# Supplementary material for: Guanidine as a strong CO2adsorbent: a DFT study on cooperative CO2adsorption
Source: Royal Society of Chemistry journal article supplement (doi:10.1039/d1cp00754h), 2021-01-01
Supplement: d1cp00754h1.pdf [file d1cp00754h1.pdf]

# Guanidine as a strong CO<sub>2</sub> adsorbent: A DFT study on cooperative CO<sub>2</sub> adsorption

Sebastian Anila<sup>ab</sup> and Cherumuttathu H. Suresh<sup>\*ab</sup>

<sup>a</sup>Chemical Sciences and Technology Division, CSIR– National Institute for Interdisciplinary Science and Technology, Thiruvananthapuram Kerala, 695 019, India.

<sup>b</sup>Academy of Scientific and Innovative Research (AcSIR), Ghaziabad 201002, India.

\*Tel: +91-471-2515472, E-mail: sureshch@niist.res.in, sureshch@gmail.com

## Supporting Information

### Table of Contents

| Sl. No. | Title                                                                                                                                                                                         | Page No. |
|---------|-----------------------------------------------------------------------------------------------------------------------------------------------------------------------------------------------|----------|
| 1       | <b>Fig. S1</b> Optimized geometries of G(CO <sub>2</sub> ) <sub>n</sub> complexes at M06-2X/6-311++G** level.                                                                                 | S3       |
| 2       | <b>Fig. S2</b> Correlation between ΔE (kcal/mol) and number of CO <sub>2</sub> molecules (n) of G(CO <sub>2</sub> ) <sub>n</sub> complexes at M06-2X/6-311++G** level.                        | S3       |
| 3       | <b>Fig.S3</b> Optimized geometries (side view with bowl depth ) of (G-CO <sub>2</sub> ) <sub>n</sub> complexes at M06-2X/6-311++G** level for n= 4 to 10.                                     | S4       |
| 4       | <b>Table S1</b> O...HN and H...OC hydrogen bond angle (°) of (G-CO <sub>2</sub> ) <sub>n</sub> complexes at M06-2X/6-311++G** level.                                                          | S4       |
| 5       | <b>Fig. S4</b> Correlation between ΔE (kcal/mol) and number of CO <sub>2</sub> molecules (n) of (G-CO <sub>2</sub> ) <sub>n</sub> complexes at M06-2X/6-311++G** level.                       | S5       |
| 6       | <b>Table S2.</b> ZPE and BSSE corrected ΔE <sub>/CO<sub>2</sub></sub> and ΔG <sub>/CO<sub>2</sub></sub> (kcal/mol) of (G-CO <sub>2</sub> ) <sub>n</sub> complexes at M06-2X/6-311++G** level. | S5       |
| 7       | <b>Table S3.</b> Average δ values of C nucleus of the CO <sub>2</sub> molecules in (G-CO <sub>2</sub> ) <sub>n</sub> complexes at M062X/6-311++G** level.                                     | S6       |
| 8       | <b>Fig. S5</b> QTAIM plots of G(CO <sub>2</sub> ) <sub>n</sub> complexes for n=5-10 at M06-2X/6-311++G**                                                                                      | S7       |
| 9       | <b>Fig.S6</b> Correlation between Σρ <sub>b</sub> and ΔE for G(CO <sub>2</sub> ) <sub>n</sub> clusters.                                                                                       | S8       |

|    |                                                                                                                                                                                                                                 |     |
|----|---------------------------------------------------------------------------------------------------------------------------------------------------------------------------------------------------------------------------------|-----|
| 10 | <b>Table S4.</b> Total values of QTAIM parameters (a.u.) of the non-covalent interactions in $G(\text{CO}_2)_n$ clusters.                                                                                                       | S8  |
| 11 | <b>Table S5.</b> Average values of QTAIM parameters (a.u.) of the non-covalent interactions in $G(\text{CO}_2)_n$ clusters.                                                                                                     | S9  |
| 12 | <b>Table S6.</b> Total values of QTAIM parameters (a.u.) of the O...HN non-covalent interactions in $(\text{G}-\text{CO}_2)_n$ clusters.                                                                                        | S9  |
| 13 | <b>Table S7.</b> Average values of QTAIM parameters (a.u.) of the O...HN non-covalent interactions in $(\text{G}-\text{CO}_2)_n$ clusters.                                                                                      | S10 |
| 14 | <b>Table S8.</b> Total values of QTAIM parameters (a.u. ) of N-C covalent interactions in $(\text{G}-\text{CO}_2)_n$ clusters.                                                                                                  | S10 |
| 15 | <b>Table S9.</b> Average values of QTAIM parameters of the N-C covalent interactions in $(\text{G}-\text{CO}_2)_n$ clusters.                                                                                                    | S11 |
| 16 | <b>Table S10.</b> $\Sigma V_n^N$ and $\Sigma V_n^H$ for the $(\text{G}-\text{CO}_2)_n$ clusters in a. u. and the corresponding $\Delta \Sigma V_n^N$ and $\Delta \Sigma V_n^G$ in kcal/mol at M062X/6-311++G** level of theory. | S12 |
| 17 | <b>Fig.S7</b> Correlation between $\Sigma V_n$ (a.u.) and $\Delta E$ (kcal/mol).                                                                                                                                                | S12 |
| 18 | <b>Fig.S8 (a)</b> Variation of $\Sigma \Delta V_n^N$ (a.u.) with $\Delta E$ (kcal/mol) and <b>(b)</b> $\Sigma \Delta V_n^H$ with $\Delta E$ (kcal/mol).                                                                         | S13 |
| 19 | <b>Table S11.</b> BSSE and ZPE corrected $\Delta E$ (kcal/mol) for $(\text{G}-\text{CO}_2)_n$ complexes using different methods with dispersion correction in conjunction with basis set 6-311++G**                             | S13 |
| 20 | <b>Table S12.</b> BSSE and ZPE corrected $\Delta E_{/\text{CO}_2}$ (kcal/mol) for $(\text{G}-\text{CO}_2)_n$ complexes using different methods with dispersion correction in conjunction with basis set 6-311++G**.             | S14 |
| 21 | <b>Table S13</b> BSSE and ZPE corrected $\Delta G_{/\text{G}-\text{CO}_2}$ (kcal/mol) for $(\text{G}-\text{CO}_2)_n$ complexes using different methods with dispersion correction in conjunction with basis set 6-311++G**.     | S14 |
| 22 | Cartesian coordinates of optimized geometry of higher energy linear structures of $(\text{G}-\text{CO}_2)_n$ complexes at M06-2X/6-311++G** level. Atomic number followed by X, Y, Z coordinates in Å.                          | S15 |
| 23 | Cartesian coordinates of optimized geometry of cyclic structures of $(\text{G}-\text{CO}_2)_n$ clusters at M06-2X/6-311++G** level. Atomic number followed by X, Y, Z coordinates in Å.                                         | S21 |
| 24 | Cartesian coordinates of optimized geometry of cyclic structures of $\text{G}(\text{CO}_2)_n$ clusters at M06-2X/6-311++G** level. Atomic number followed by X, Y, Z coordinates in Å.                                          | S29 |
| 25 | References                                                                                                                                                                                                                      | S32 |

## Structure and energetics

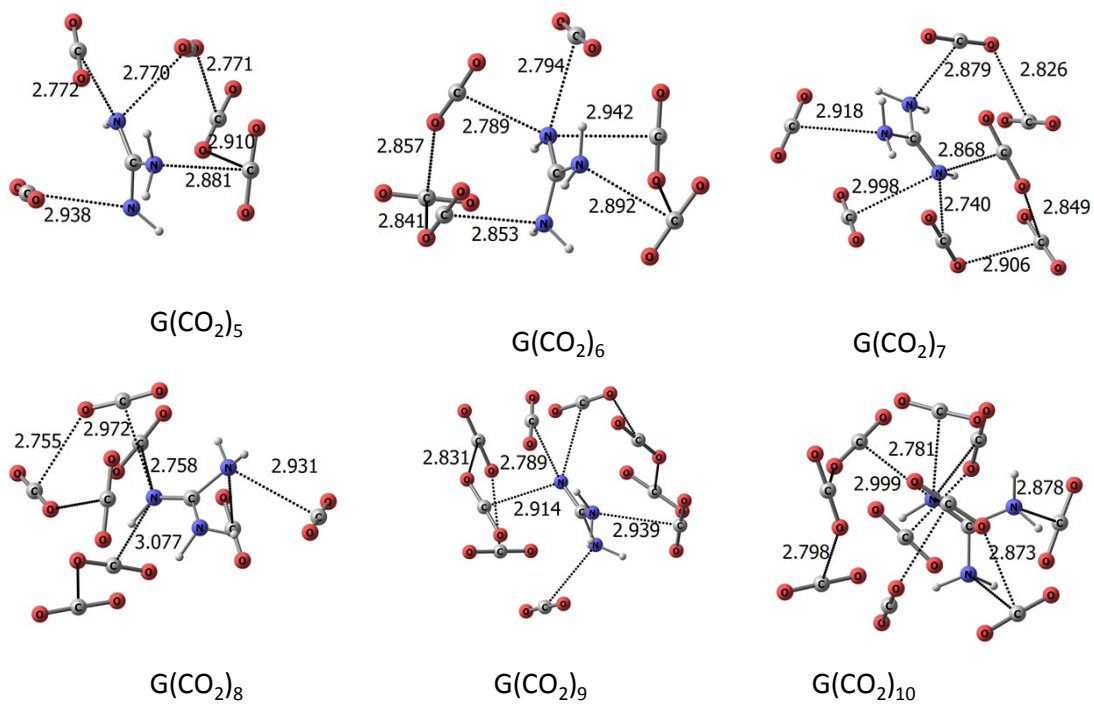

**Fig. S1** Optimized geometries of  $G(\text{CO}_2)_n$  complexes at M06-2X/6-311++G\*\* level.

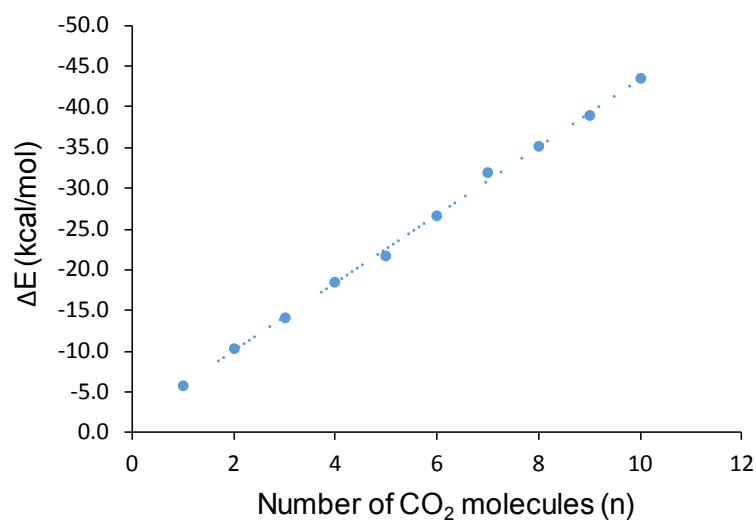

**Fig. S2** Correlation between  $\Delta E$  (kcal/mol) and number of  $\text{CO}_2$  molecules ( $n$ ) of  $\text{G}(\text{CO}_2)_n$  complexes at M06-2X/6-311++G\*\* level.

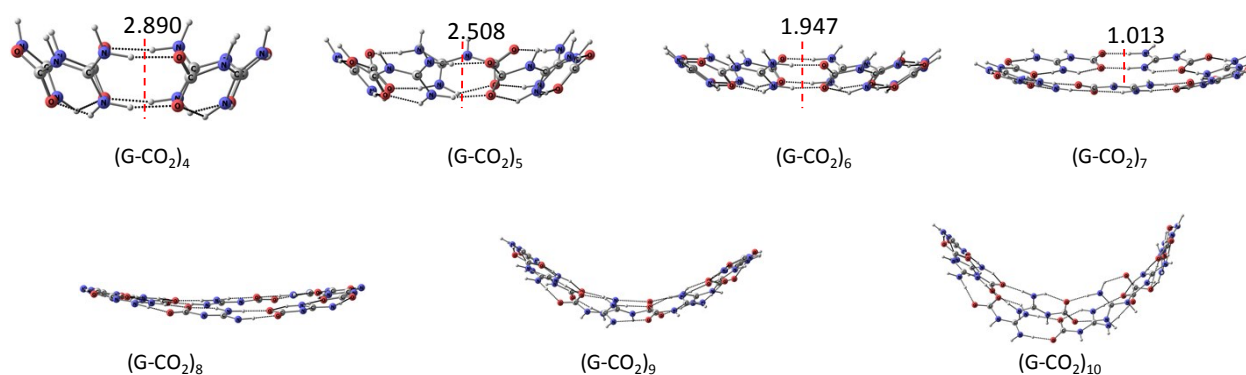

**Fig.S3** Optimized geometries (side view with bowl depth) of  $(\text{G}-\text{CO}_2)_n$  complexes at M06-2X/6-311++G\*\* level for  $n= 4$  to 10.

**Table S1.** O...NH and H...OC hydrogen bond angle ( $^\circ$ ) of  $(\text{G}-\text{CO}_2)_n$  complexes at M06-2X/6-311++G\*\* level.

| System                     | O...HN | H...OC |
|----------------------------|--------|--------|
| $(\text{G}-\text{CO}_2)_2$ | 145.2  | 112.6  |
| $(\text{G}-\text{CO}_2)_3$ | 153.4  | 113.9  |

|                        |       |       |
|------------------------|-------|-------|
| $(\text{G-CO}_2)_4$    | 162.4 | 114.6 |
| $(\text{G-CO}_2)_5$    | 168.4 | 116.1 |
| $(\text{G-CO}_2)_6$    | 172.8 | 116.9 |
| $(\text{G-CO}_2)_7$    | 176.7 | 117.2 |
| $(\text{G-CO}_2)_8$    | 178.5 | 115.7 |
| $(\text{G-CO}_2)_9$    | 176.7 | 114.7 |
| $(\text{G-CO}_2)_{10}$ | 173.2 | 114.0 |

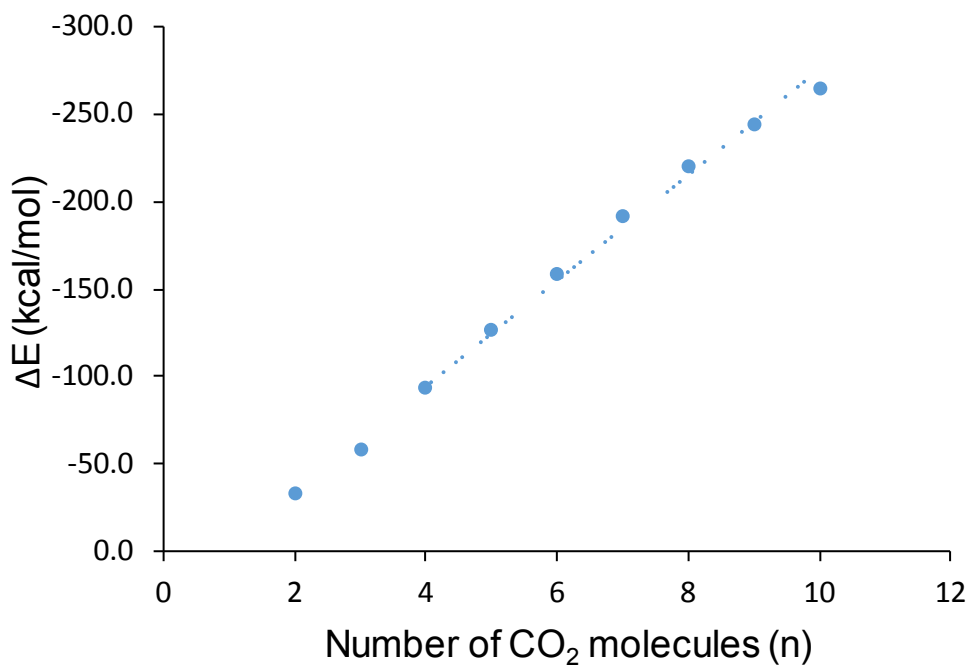

**Fig. S4** Correlation between  $\Delta E$  (kcal/mol) and number of  $\text{CO}_2$  molecules ( $n$ ) of  $(\text{G-CO}_2)_n$  complexes at M06-2X/6-311++G\*\* level.

**Table S2.** ZPE and BSSE corrected  $\Delta E_{/\text{CO}_2}$  and  $\Delta G_{/\text{CO}_2}$  (kcal/mol) of  $(\text{G-CO}_2)_n$  complexes at M06-2X/6-311++G\*\* level.

| n  | $\Delta E_{/CO_2}$ (kcal/mol) | $\Delta G_{/CO_2}$ (kcal/mol) |
|----|-------------------------------|-------------------------------|
| 1  | -5.7                          | 2.3                           |
| 2  | -16.4                         | -0.5                          |
| 3  | -19.4                         | -1.0                          |
| 4  | -23.4                         | -4.1                          |
| 5  | -25.3                         | -5.7                          |
| 6  | -26.5                         | -6.6                          |
| 7  | -27.4                         | -7.7                          |
| 8  | -27.5                         | -7.8                          |
| 9  | -27.2                         | -7.1                          |
| 10 | -26.5                         | -6.3                          |

### NMR analysis

The formation of the G-CO<sub>2</sub> zwitterion is verified using the NMR analysis of the (G-CO<sub>2</sub>)<sub>n</sub> clusters at the same level of DFT. NMR calculations are carried out for the (G-CO<sub>2</sub>)<sub>n</sub> complexes and the reference compound TMS to obtain the magnetic shielding value ( $\sigma$ ) of the C nucleus. Nuclear magnetic resonance (NMR) analysis has been carried out using the Gauge-Independent Atomic Orbital (GIAO) method<sup>1</sup> at M06-2X/6-311++G\*\* level. The calculated magnetic shielding value ( $\sigma$ ) is converted into a chemical shift ( $\delta$ ) by calculating the magnetic shielding of the reference compound,<sup>2</sup> trimethyl silane (TMS) using eq. 2,

$$\delta_{nucl} = \sigma_{ref} - \sigma_{nucl} \quad (S1)$$

where  $\delta_{nucl}$  is the chemical shift of the nucleus under study (here C of CO<sub>2</sub>),  $\sigma_{ref}$  is the calculated shielding of TMS, and  $\sigma_{nucl}$  is the calculated shielding of the C.

**Table S3.** Average  $\delta$  values of C nucleus of the CO<sub>2</sub> molecules in (G-CO<sub>2</sub>)<sub>n</sub> complexes at M062X/6-311++G\*\* level.

| System              | $\delta$ (ppm) |
|---------------------|----------------|
| CO <sub>2</sub>     | 139            |
| G(CO <sub>2</sub> ) | 140            |

|                                    |     |
|------------------------------------|-----|
| (G-CO <sub>2</sub> ) <sub>2</sub>  | 164 |
| (G-CO <sub>2</sub> ) <sub>3</sub>  | 168 |
| (G-CO <sub>2</sub> ) <sub>4</sub>  | 168 |
| (G-CO <sub>2</sub> ) <sub>5</sub>  | 169 |
| (G-CO <sub>2</sub> ) <sub>6</sub>  | 169 |
| (G-CO <sub>2</sub> ) <sub>7</sub>  | 169 |
| (G-CO <sub>2</sub> ) <sub>8</sub>  | 170 |
| (G-CO <sub>2</sub> ) <sub>9</sub>  | 170 |
| (G-CO <sub>2</sub> ) <sub>10</sub> | 170 |

From these  $\delta$  values are calculated using the equation S1. The  $\delta$  value observed for the CO<sub>2</sub> is 139 ppm. The values observed for the G-CO<sub>2</sub> is 140 ppm which is comparable to that of CO<sub>2</sub>. From the complex (G-CO<sub>2</sub>)<sub>2</sub> onwards the  $\delta$  value is found to have a large jump to 160 ppm and it slightly increases to 164 ppm for (G-CO<sub>2</sub>)<sub>3</sub> and beyond this  $\delta$  value remains almost same 168 -170 ppm towards the larger clusters. This higher  $\delta$  values shows the transformation of the C nuclei of CO<sub>2</sub> to the anionic nature in the zwitterion, G-CO<sub>2</sub> with partial negative charge on CO<sub>2</sub> and a partial positive charge on the imine unit. This  $\delta$  value is in the range that is observed for the carbamate group, which again shows the formation of carbamate through the N-C covalent interaction.<sup>3-6</sup> The constant nature of the  $\delta$  value beyond  $n=5$  again shows that the nature of the electronic environment around the C nucleus remains same in higher clusters. This was also visible in the  $\Delta E$  value of the (G-CO<sub>2</sub>)<sub>n</sub> clusters, which showed a constant value of  $\Delta E_{/G-CO_2}$  for the higher clusters

### QTAIM analysis

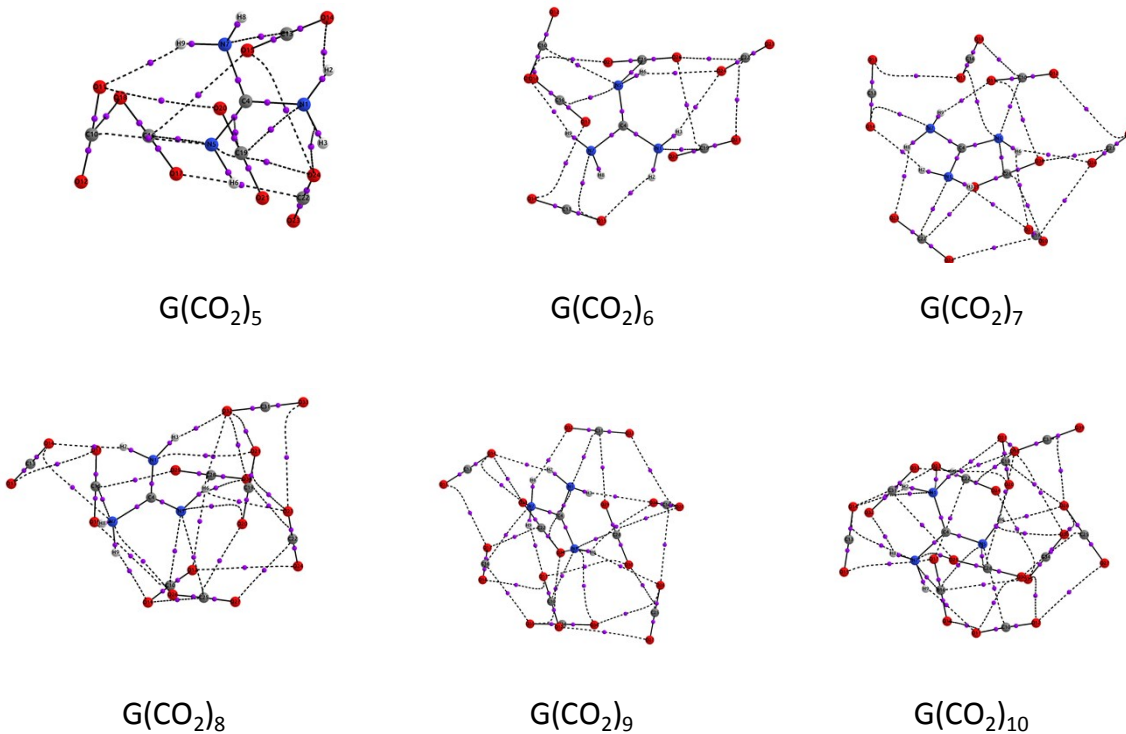

**Fig. S5** QTAIM plots of  $G(\text{CO}_2)_n$  complexes for  $n=5-10$  at M06-2X/6-311++G\*\*

In the  $G(\text{CO}_2)_n$  clusters as well, Koch-Popelier criterion on  $\rho_b$  is valid for all the  $G \dots \text{CO}_2$  non-covalent interactions and the sign of  $\nabla^2\rho$  is positive (**Table S3**). The increased cooperativity in the large clusters is marked with very higher  $\Sigma\rho_b$  resulting from the  $\text{CO}_2 \dots \text{CO}_2$  interactions. As observed in the case of the  $(G-\text{CO}_2)_n$  clusters, here also  $\Sigma\rho_b$  is in good linear correlation with  $\Delta E$ , having a correlation coefficient of  $R = 0.9878$  a. u.



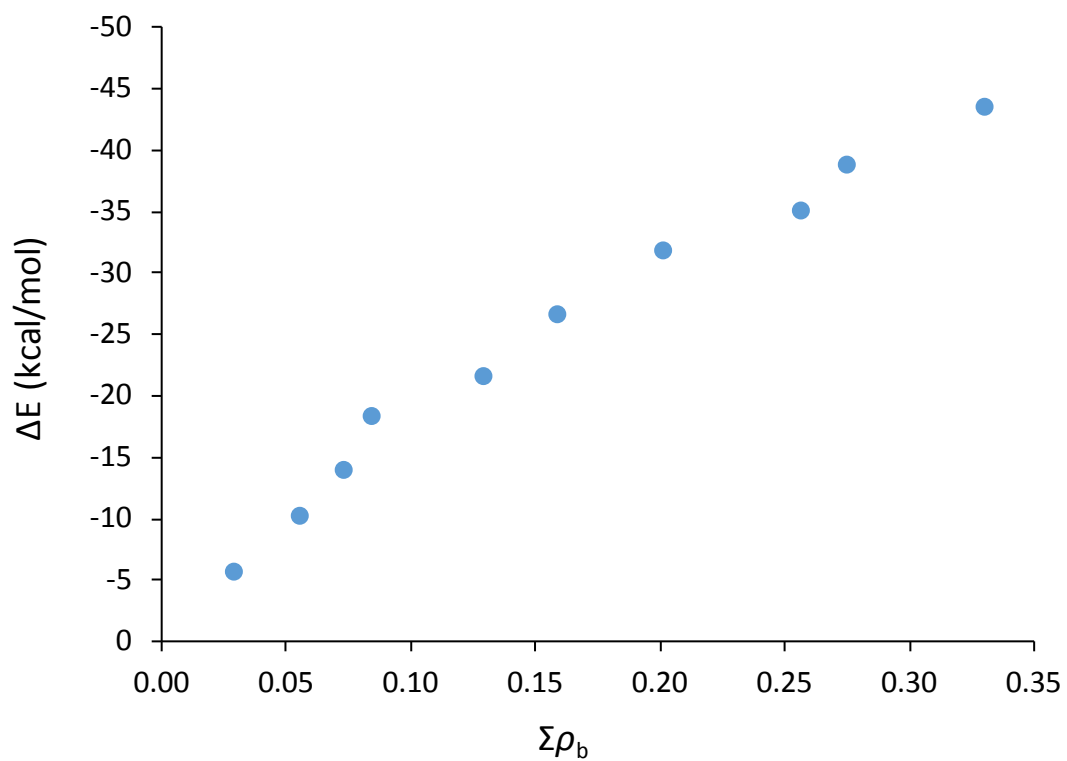

**Fig.S6** Correlation between  $\Sigma\rho_b$  and  $\Delta E$  for  $G(\text{CO}_2)_n$  clusters.

**Table S4.** Total values of QTAIM parameters (a.u.) of the non-covalent interactions in  $G(\text{CO}_2)_n$  clusters.

| n  | $\Sigma\rho$ | $\Sigma\nabla^2\rho$ | $\Sigma\lambda_1$ | $\Sigma\lambda_2$ | $\Sigma\lambda_3$ |
|----|--------------|----------------------|-------------------|-------------------|-------------------|
| 1  | 0.0287       | 0.1075               | -0.0270           | -0.0204           | 0.1549            |
| 2  | 0.0546       | 0.2148               | -0.0439           | -0.0260           | 0.2847            |
| 3  | 0.0723       | 0.2800               | -0.0547           | -0.0294           | 0.3641            |
| 4  | 0.0833       | 0.3330               | -0.0656           | -0.0327           | 0.4314            |
| 5  | 0.1283       | 0.4987               | -0.1026           | -0.0569           | 0.6583            |
| 6  | 0.1586       | 0.6208               | -0.1394           | -0.0819           | 0.8421            |
| 7  | 0.2004       | 0.7917               | -0.1705           | -0.0963           | 1.0585            |
| 8  | 0.2556       | 1.0258               | -0.2086           | -0.1141           | 1.3484            |
| 9  | 0.2746       | 1.1129               | -0.2338           | -0.1288           | 1.4755            |
| 10 | 0.3298       | 1.3333               | -0.2801           | -0.1489           | 1.7622            |

**Table S5.** Average values of QTAIM parameters (a.u.) of the non-covalent interactions in  $G(\text{CO}_2)_n$  clusters.

| n  | $\rho_{b.\text{avg}}$ | $\nabla^2\rho_{.\text{avg}}$ | $\lambda_{1.\text{avg}}$ | $\lambda_{2.\text{avg}}$ | $\lambda_{3.\text{avg}}$ |
|----|-----------------------|------------------------------|--------------------------|--------------------------|--------------------------|
| 1  | 0.0143                | 0.0537                       | -0.0135                  | -0.0102                  | 0.0774                   |
| 2  | 0.0109                | 0.0430                       | -0.0088                  | -0.0052                  | 0.0569                   |
| 3  | 0.0103                | 0.0400                       | -0.0078                  | -0.0042                  | 0.0520                   |
| 4  | 0.0104                | 0.0416                       | -0.0082                  | -0.0041                  | 0.0539                   |
| 5  | 0.0092                | 0.0356                       | -0.0073                  | -0.0041                  | 0.0470                   |
| 6  | 0.0092                | 0.0356                       | -0.0073                  | -0.0041                  | 0.0470                   |
| 7  | 0.0106                | 0.0414                       | -0.0093                  | -0.0055                  | 0.0561                   |
| 8  | 0.0100                | 0.0396                       | -0.0085                  | -0.0048                  | 0.0529                   |
| 9  | 0.0095                | 0.0380                       | -0.0077                  | -0.0042                  | 0.0499                   |
| 10 | 0.0095                | 0.0384                       | -0.0081                  | -0.0044                  | 0.0509                   |

**Table S6.** Total values of QTAIM parameters (a.u.) of the O...HN non-covalent interactions in  $(G\text{-CO}_2)_n$  clusters.

| System                 | $\Sigma\rho$ | $\Sigma\nabla^2\rho$ | $\Sigma\lambda_1$ | $\Sigma\lambda_2$ | $\Sigma\lambda_3$ |
|------------------------|--------------|----------------------|-------------------|-------------------|-------------------|
| $G(\text{CO}_2)$       | 0.0287       | 0.1075               | -0.0270           | -0.0204           | 0.1549            |
| $(G\text{-CO}_2)_2$    | 0.1840       | 0.6904               | -0.2582           | -0.2444           | 1.1930            |
| $(G\text{-CO}_2)_3$    | 0.2459       | 0.9208               | -0.3449           | -0.3198           | 1.5856            |
| $(G\text{-CO}_2)_4$    | 0.4128       | 1.5099               | -0.6204           | -0.5854           | 2.7157            |
| $(G\text{-CO}_2)_5$    | 0.5436       | 1.9398               | -0.8388           | -0.7990           | 3.5776            |
| $(G\text{-CO}_2)_6$    | 0.6705       | 2.3568               | -1.0490           | -1.0049           | 4.4106            |
| $(G\text{-CO}_2)_7$    | 0.7931       | 2.7601               | -1.2501           | -1.2026           | 5.2128            |
| $(G\text{-CO}_2)_8$    | 0.7255       | 2.4471               | -1.1626           | -1.1196           | 4.7293            |
| $(G\text{-CO}_2)_9$    | 1.0112       | 3.4369               | -1.6048           | -1.5464           | 6.5881            |
| $(G\text{-CO}_2)_{10}$ | 1.0883       | 3.7676               | -1.6940           | -1.6323           | 7.0940            |

**Table S7.** Average values of QTAIM parameters (a.u.) of the O...HN non-covalent interactions in (G-CO<sub>2</sub>)<sub>n</sub> clusters.

| System                             | $\rho_{b,avg}$ | $\nabla^2\rho_{b,avg}$ | $\lambda_{1,avg}$ | $\lambda_{2,avg}$ | $\lambda_{3,avg}$ |
|------------------------------------|----------------|------------------------|-------------------|-------------------|-------------------|
| G(CO <sub>2</sub> )                | 0.0143         | 0.0537                 | -0.0135           | -0.0102           | 0.0774            |
| (G-CO <sub>2</sub> ) <sub>2</sub>  | 0.0307         | 0.1151                 | -0.0430           | -0.0407           | 0.1988            |
| (G-CO <sub>2</sub> ) <sub>3</sub>  | 0.0273         | 0.1023                 | -0.0383           | -0.0355           | 0.1762            |
| (G-CO <sub>2</sub> ) <sub>4</sub>  | 0.0344         | 0.1258                 | -0.0517           | -0.0488           | 0.2263            |
| (G-CO <sub>2</sub> ) <sub>5</sub>  | 0.0362         | 0.1293                 | -0.0559           | -0.0533           | 0.2385            |
| (G-CO <sub>2</sub> ) <sub>6</sub>  | 0.0372         | 0.1309                 | -0.0583           | -0.0558           | 0.2450            |
| (G-CO <sub>2</sub> ) <sub>7</sub>  | 0.0378         | 0.1314                 | -0.0595           | -0.0573           | 0.2482            |
| (G-CO <sub>2</sub> ) <sub>8</sub>  | 0.0302         | 0.1020                 | -0.0484           | -0.0467           | 0.1971            |
| (G-CO <sub>2</sub> ) <sub>9</sub>  | 0.0375         | 0.1273                 | -0.0594           | -0.0573           | 0.2440            |
| (G-CO <sub>2</sub> ) <sub>10</sub> | 0.0363         | 0.1256                 | -0.0565           | -0.0544           | 0.2365            |

**Table S8.** Total values of QTAIM parameters (a.u. ) of N-C covalent interactions in (G-CO<sub>2</sub>)<sub>n</sub> clusters.

| System              | $\Sigma\rho$ | $\Sigma\nabla^2\rho$ |
|---------------------|--------------|----------------------|
| G-CO <sub>2</sub>   | 0.0165       | 0.0599               |
| (G-C) <sub>2</sub>  | 0.4871       | -1.1598              |
| (G-C) <sub>3</sub>  | 0.7544       | -1.8788              |
| (G-C) <sub>4</sub>  | 1.0251       | -2.6175              |
| (G-C) <sub>5</sub>  | 1.2970       | -3.3574              |
| (G-C) <sub>6</sub>  | 1.5669       | -4.0825              |
| (G-C) <sub>7</sub>  | 1.8347       | -4.7956              |
| (G-C) <sub>8</sub>  | 2.1045       | -5.5167              |
| (G-C) <sub>9</sub>  | 2.3670       | -6.2036              |
| (G-C) <sub>10</sub> | 2.6189       | -6.8315              |

**Table S9.** Average values of QTAIM parameters of the N-C covalent interactions in (G-CO<sub>2</sub>)<sub>n</sub> clusters.

| System                             | $\rho_{b.avg}$ | $\nabla^2\rho_{b.avg}$ |
|------------------------------------|----------------|------------------------|
| G(CO <sub>2</sub> )                | 0.0165         | 0.0599                 |
| (G-CO <sub>2</sub> ) <sub>2</sub>  | 0.2436         | -0.5799                |
| (G-CO <sub>2</sub> ) <sub>3</sub>  | 0.2515         | -0.6263                |
| (G-CO <sub>2</sub> ) <sub>4</sub>  | 0.2563         | -0.6544                |
| (G-CO <sub>2</sub> ) <sub>5</sub>  | 0.2594         | -0.6715                |
| (G-CO <sub>2</sub> ) <sub>6</sub>  | 0.2611         | -0.6804                |
| (G-CO <sub>2</sub> ) <sub>7</sub>  | 0.2621         | -0.6851                |
| (G-CO <sub>2</sub> ) <sub>8</sub>  | 0.2631         | -0.6896                |
| (G-CO <sub>2</sub> ) <sub>9</sub>  | 0.2630         | -0.6893                |
| (G-CO <sub>2</sub> ) <sub>10</sub> | 0.2619         | -0.6831                |

### MESP analysis

The sum of potential at the sp<sup>2</sup> N atom ( $\Sigma V_n^N$ ) and all the H atoms ( $\Sigma V_n^H$ ) of every G is computed for (G-CO<sub>2</sub>)<sub>n</sub> clusters (**Table S9**). From the  $V_n$  values of single G molecule the predicted values for potential at the sp<sup>2</sup> N atom ( $\Sigma V_n^{N*}$ ) and all the H atoms ( $\Sigma V_n^{H*}$ ) are generated, using which the difference in  $V_n$  ( $\Delta\Sigma V_n^N$  and  $\Delta\Sigma V_n^G$ ) is calculated (**Table S9**). The value of  $\Delta\Sigma V_n^N$  and  $\Delta\Sigma V_n^H$  increases steadily with increasing value of  $n$ . Larger the clusters larger is the delocalisation of the potential from the sp<sup>2</sup> N centres to the CO<sub>2</sub> molecules. This clearly shows the impact of the cooperativity from the neighbouring G-CO<sub>2</sub> units in the dispersing the negative potential and thereby to stabilise the larger clusters.

**Table. S10**  $\Sigma V_n^N$  and  $\Sigma V_n^H$  for the (G-CO<sub>2</sub>)<sub>n</sub> clusters in a. u. and the corresponding  $\Delta\Sigma V_n^N$  and  $\Delta\Sigma V_n^G$  in kcal/mol at M062X/6-311++G\*\* level of theory.

| n | $\Sigma V_n^N$ | $\Sigma V_n^H$ | $\Delta\Sigma V_n^N$ | $\Delta\Sigma V_n^H$ |
|---|----------------|----------------|----------------------|----------------------|
| 1 | -5.1270        | -18.4349       | 4.6                  | 0.0                  |
| 2 | -9.9697        | -36.7205       | 113.9                | 0.5                  |
| 3 | -14.9997       | -55.0329       | 199.2                | 0.7                  |
| 4 | -20.0674       | -73.3505       | 282.9                | 0.9                  |
| 5 | -25.1727       | -91.7001       | 346.1                | 1.0                  |

|    |          |           |       |     |
|----|----------|-----------|-------|-----|
| 6  | -30.2776 | -110.0520 | 408.0 | 1.1 |
| 7  | -35.3824 | -128.4068 | 468.9 | 1.2 |
| 8  | -40.4506 | -146.7577 | 531.6 | 1.4 |
| 9  | -45.5132 | -165.1013 | 597.9 | 1.6 |
| 10 | -50.5605 | -183.4453 | 664.7 | 1.8 |
| 11 | -55.5868 | -201.7823 | 736.0 | 2.0 |

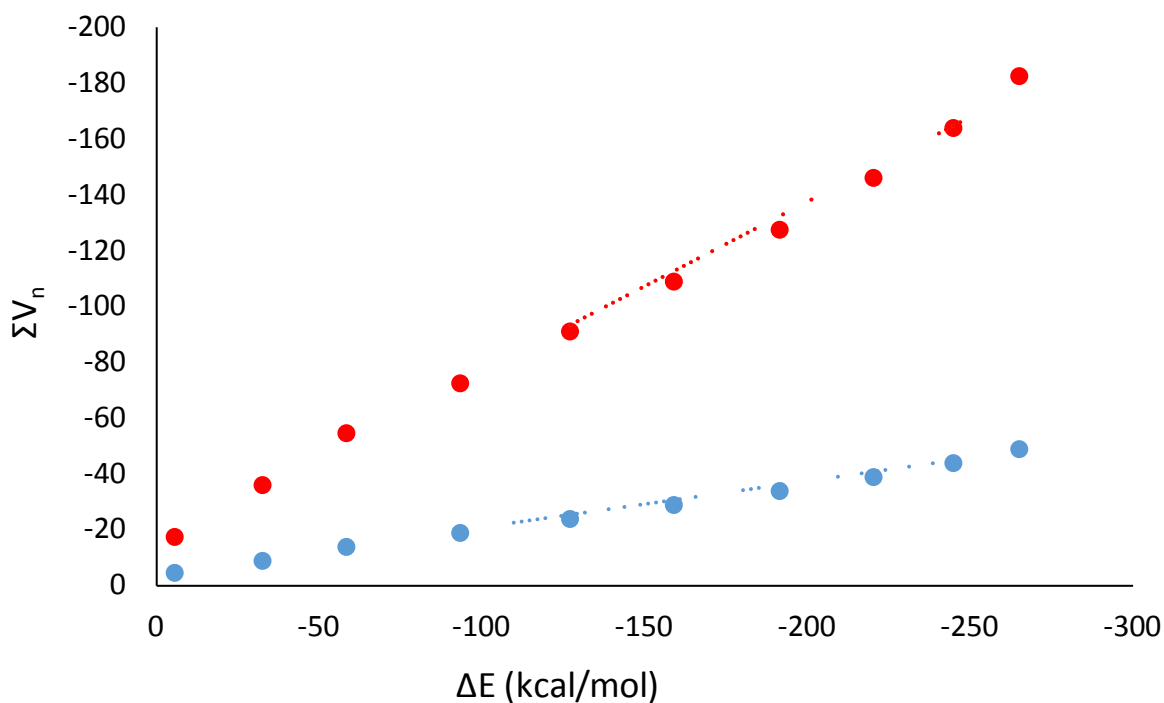

**Fig.S7** Correlation between  $\Sigma V_n$  (a.u.) and  $\Delta E$  (kcal/mol).

**Fig. S7** gives the variation of  $\Sigma V_n^N$  and  $\Sigma V_n^H$  with  $\Delta E$ . Both are giving good linear correlations with correlation coefficient of 0.998 in both the cases. These strong linear correlations suggest that the total interaction energy is directly proportional to the ability of the systems to undergo electron delocalization. Larger the  $n$  values larger will be the delocalization and resulting cooperative interactions leading to the formation more stable clusters.

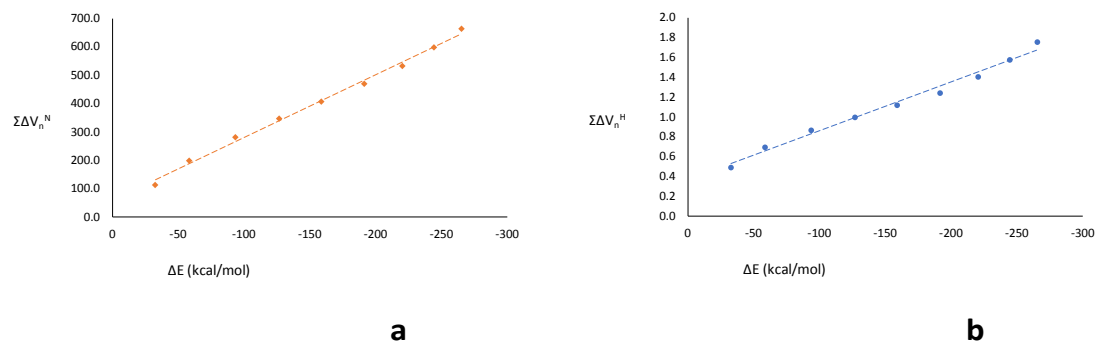

**Fig.S8 (a)** Variation of  $\Sigma\Delta V_n^N$  (a.u.) with  $\Delta E$  (kcal/mol) and **(b)**  $\Sigma\Delta V_n^H$  with  $\Delta E$  (kcal/mol).

### Benchmark Study

**Table S11.** BSSE and ZPE corrected  $\Delta E$  (kcal/mol) for  $(G-CO_2)_n$  complexes using different methods with dispersion correction in conjunction with basis set 6-311++G\*\*.

| System                            | B3LYP  | B3LYP-D3 | M06-2X | M06-2X-D3 | BP86-D3 | wB97XD |
|-----------------------------------|--------|----------|--------|-----------|---------|--------|
| G(CO <sub>2</sub> )               | -3.1   | -5.3     | -5.7   | -3.5      | -4.9    | -4.7   |
| (G-CO <sub>2</sub> ) <sub>2</sub> | -19.8  | -28.9    | -32.8  | -33.4     | -34.1   | -32.1  |
| (G-CO <sub>2</sub> ) <sub>3</sub> | -35.8  | -54.3    | -58.3  | -60.1     | -62.5   | -58.3  |
| (G-CO <sub>2</sub> ) <sub>4</sub> | -67.2  | -89.2    | -93.4  | -95.7     | -99.0   | -94.9  |
| (G-CO <sub>2</sub> ) <sub>5</sub> | -94.3  | -120.9   | -126.6 | -129.1    | -132.7  | -128.4 |
| (G-CO <sub>2</sub> ) <sub>6</sub> | -120.2 | -151.6   | -158.8 | -161.5    | -165.4  | -160.7 |
| (G-CO <sub>2</sub> ) <sub>7</sub> | -145.5 | -182.1   | -191.5 | -193.9    | -197.5  | -192.7 |
| (G-CO <sub>2</sub> ) <sub>8</sub> | -168.8 | -209.6   | -219.9 | -223.8    | -226.4  | -222.3 |
| (G-CO <sub>2</sub> ) <sub>9</sub> | -186.3 | -232.7   | -244.4 | -248.2    | -252.1  | -246.6 |

**Table S12.** BSSE and ZPE corrected  $\Delta E_{/CO_2}$  (kcal/mol) for  $(G-CO_2)_n$  complexes using different methods with dispersion correction in conjunction with basis set 6-311++G\*\*.

| System                            | B3LYP | B3LYP-D3 | M06-2X | M06-2X-D3 | BP86-D3 | wB97XD |
|-----------------------------------|-------|----------|--------|-----------|---------|--------|
| G(CO <sub>2</sub> )               | -3.1  | -5.3     | -5.7   | -3.5      | -4.9    | -4.7   |
| (G-CO <sub>2</sub> ) <sub>2</sub> | -9.9  | -14.4    | -16.4  | -16.7     | -17.1   | -16.1  |
| (G-CO <sub>2</sub> ) <sub>3</sub> | -11.9 | -18.1    | -19.4  | -20.0     | -20.8   | -19.4  |
| (G-CO <sub>2</sub> ) <sub>4</sub> | -16.8 | -22.3    | -23.4  | -23.9     | -24.8   | -23.7  |
| (G-CO <sub>2</sub> ) <sub>5</sub> | -18.9 | -24.2    | -25.3  | -25.8     | -26.5   | -25.7  |
| (G-CO <sub>2</sub> ) <sub>6</sub> | -20.0 | -25.3    | -26.5  | -26.9     | -27.6   | -26.8  |
| (G-CO <sub>2</sub> ) <sub>7</sub> | -20.8 | -26.0    | -27.4  | -27.7     | -28.2   | -27.5  |
| (G-CO <sub>2</sub> ) <sub>8</sub> | -21.1 | -26.2    | -27.5  | -28.0     | -28.3   | -27.8  |
| (G-CO <sub>2</sub> ) <sub>9</sub> | -20.7 | -25.9    | -27.2  | -27.6     | -28.0   | -27.4  |

**Table S13.** BSSE and ZPE corrected  $\Delta G_{G-CO_2}$  (kcal/mol) for (G-CO<sub>2</sub>)<sub>n</sub> complexes using different methods with dispersion correction in conjunction with basis set 6-311++G\*\*.

| System                            | B3LYP | B3LYP-D3 | M06-2X | M06-2X-D3 | BP86-D3 | wB97XD |
|-----------------------------------|-------|----------|--------|-----------|---------|--------|
| G(CO <sub>2</sub> )               | 4.4   | 2.4      | 2.3    | 4.4       | 2.8     | 3.0    |
| (G-CO <sub>2</sub> ) <sub>2</sub> | 5.9   | 1.4      | -0.5   | -0.8      | -1.1    | -0.2   |
| (G-CO <sub>2</sub> ) <sub>3</sub> | 6.6   | 0.4      | -1.0   | -1.6      | -2.2    | -0.9   |
| (G-CO <sub>2</sub> ) <sub>4</sub> | 2.7   | -2.8     | -4.1   | -4.8      | -5.2    | -4.2   |
| (G-CO <sub>2</sub> ) <sub>5</sub> | 1.1   | -4.3     | -5.7   | -6.2      | -6.6    | -5.8   |
| (G-CO <sub>2</sub> ) <sub>6</sub> | 0.1   | -5.2     | -6.6   | -7.1      | -7.5    | -6.7   |
| (G-CO <sub>2</sub> ) <sub>7</sub> | -0.7  | -6.0     | -7.7   | -8.0      | -8.3    | -7.5   |
| (G-CO <sub>2</sub> ) <sub>8</sub> | -1.2  | -6.3     | -7.8   | -8.7      | -8.3    | -7.9   |
| (G-CO <sub>2</sub> ) <sub>9</sub> | -0.4  | -5.6     | -7.1   | -7.5      | -7.7    | -7.1   |

**Cartesian coordinates of higher energy linear structures of (G-CO<sub>2</sub>)<sub>n</sub> complexes.**

|                                   |                                   |
|-----------------------------------|-----------------------------------|
| (G-CO <sub>2</sub> ) <sub>2</sub> | (G-CO <sub>2</sub> ) <sub>3</sub> |
|-----------------------------------|-----------------------------------|

|                                       |              |              |              |                                       |              |              |              |
|---------------------------------------|--------------|--------------|--------------|---------------------------------------|--------------|--------------|--------------|
| <b>SCF E = -787.885496131 a.u.</b>    |              |              |              | <b>SCF E = -1181.85419552 a.u.</b>    |              |              |              |
| 7                                     | -5.584768000 | -0.548899000 | -0.167237000 | 7                                     | 8.525385000  | -1.334875000 | -0.080005000 |
| 1                                     | -6.407220000 | 0.030705000  | -0.134516000 | 1                                     | 9.440238000  | -0.927734000 | -0.182795000 |
| 1                                     | -5.707507000 | -1.529737000 | 0.023441000  | 1                                     | 8.448989000  | -2.333630000 | -0.179986000 |
| 6                                     | -4.359622000 | 0.008194000  | -0.089616000 | 6                                     | 7.425912000  | -0.560187000 | -0.074596000 |
| 7                                     | -3.297665000 | -0.765877000 | 0.107794000  | 7                                     | 6.223531000  | -1.132434000 | -0.107867000 |
| 1                                     | -3.424820000 | -1.760842000 | 0.233907000  | 1                                     | 6.155899000  | -2.139490000 | -0.166406000 |
| 7                                     | -4.217925000 | 1.318655000  | -0.217802000 | 7                                     | 7.539602000  | 0.757372000  | -0.030649000 |
| 1                                     | -4.991481000 | 1.900525000  | -0.490842000 | 1                                     | 8.435352000  | 1.201298000  | 0.080472000  |
| 1                                     | -3.243807000 | 1.649108000  | -0.214727000 | 1                                     | 6.652896000  | 1.272456000  | 0.018982000  |
| 6                                     | -1.856936000 | -0.347123000 | 0.122228000  | 6                                     | 4.898205000  | -0.457425000 | -0.041560000 |
| 8                                     | -1.668695000 | 0.868927000  | -0.038710000 | 8                                     | 4.940123000  | 0.781829000  | 0.036698000  |
| 8                                     | -1.110169000 | -1.292313000 | 0.295020000  | 8                                     | 3.973259000  | -1.251653000 | -0.077886000 |
| 7                                     | 1.223780000  | 1.358771000  | 0.360045000  | 7                                     | 2.213741000  | 1.791968000  | -0.036423000 |
| 1                                     | 0.237320000  | 1.151485000  | 0.215053000  | 1                                     | 3.157469000  | 1.403285000  | -0.002421000 |
| 1                                     | 1.500237000  | 2.320450000  | 0.256925000  | 1                                     | 2.111376000  | 2.789837000  | 0.030548000  |
| 6                                     | 2.156074000  | 0.405414000  | 0.125078000  | 6                                     | 1.126011000  | 1.009835000  | 0.033161000  |
| 7                                     | 3.439185000  | 0.742506000  | 0.033885000  | 7                                     | -0.085108000 | 1.588127000  | 0.078846000  |
| 1                                     | 3.695372000  | 1.712425000  | 0.146508000  | 1                                     | -0.144849000 | 2.595602000  | 0.051904000  |
| 7                                     | 1.781914000  | -0.857435000 | 0.008024000  | 7                                     | 1.250053000  | -0.302163000 | 0.047114000  |
| 1                                     | 0.808179000  | -1.119232000 | 0.125025000  | 1                                     | 2.172690000  | -0.732211000 | 0.002834000  |
| 1                                     | 2.556636000  | -1.518142000 | -0.110482000 | 1                                     | 0.374350000  | -0.825188000 | 0.077785000  |
| 6                                     | 4.652822000  | -0.190065000 | -0.140029000 | 6                                     | -1.404267000 | 0.931125000  | 0.121177000  |
| 8                                     | 5.685444000  | 0.449108000  | -0.145222000 | 8                                     | -2.328460000 | 1.735437000  | 0.141468000  |
| 8                                     | 4.344847000  | -1.379387000 | -0.239740000 | 8                                     | -1.387119000 | -0.312309000 | 0.131416000  |
|                                       |              |              |              | 7                                     | -4.097324000 | -1.295113000 | 0.452882000  |
|                                       |              |              |              | 1                                     | -3.157654000 | -0.908091000 | 0.339811000  |
|                                       |              |              |              | 1                                     | -4.184295000 | -2.294913000 | 0.386733000  |
|                                       |              |              |              | 6                                     | -5.182226000 | -0.547685000 | 0.151044000  |
|                                       |              |              |              | 7                                     | -6.378381000 | -1.129716000 | 0.057242000  |
|                                       |              |              |              | 1                                     | -6.447743000 | -2.120414000 | 0.236660000  |
|                                       |              |              |              | 7                                     | -5.050363000 | 0.755099000  | -0.022778000 |
|                                       |              |              |              | 1                                     | -4.132618000 | 1.192810000  | 0.037198000  |
|                                       |              |              |              | 1                                     | -5.925482000 | 1.248754000  | -0.216462000 |
|                                       |              |              |              | 6                                     | -7.732470000 | -0.469543000 | -0.213232000 |
|                                       |              |              |              | 8                                     | -7.662277000 | 0.748118000  | -0.397386000 |
|                                       |              |              |              | 8                                     | -8.626969000 | -1.294789000 | -0.194228000 |
| <b>(G-CO<sub>2</sub>)<sub>4</sub></b> |              |              |              | <b>(G-CO<sub>2</sub>)<sub>5</sub></b> |              |              |              |
| <b>SCF E = -1575.82716903 a.u.</b>    |              |              |              | <b>SCF E = -1969.80087853 a.u.</b>    |              |              |              |
| 7                                     | -5.259490000 | 2.464564000  | -0.021587000 | 7                                     | 2.374032000  | 1.053327000  | -0.120085000 |
| 1                                     | -6.236599000 | 2.158190000  | -0.041855000 | 1                                     | 3.309352000  | 0.626094000  | -0.078221000 |
| 1                                     | -5.057037000 | 3.445933000  | -0.104858000 | 1                                     | 2.305410000  | 2.054644000  | -0.062560000 |
| 6                                     | -4.263757000 | 1.572852000  | -0.036657000 | 6                                     | 1.260754000  | 0.313484000  | -0.077439000 |
| 7                                     | -2.993289000 | 2.016409000  | -0.086755000 | 7                                     | 0.067891000  | 0.945501000  | -0.058655000 |
| 1                                     | -2.828494000 | 3.012296000  | -0.110698000 | 1                                     | 0.056201000  | 1.954322000  | -0.087425000 |
| 7                                     | -4.524743000 | 0.280595000  | 0.003111000  | 7                                     | 1.333492000  | -1.000301000 | -0.063017000 |
| 1                                     | -5.484016000 | -0.063259000 | 0.052833000  | 1                                     | 2.248446000  | -1.463600000 | -0.072821000 |
| 1                                     | -3.710116000 | -0.332169000 | 0.004422000  | 1                                     | 0.444874000  | -1.495346000 | -0.044536000 |
| 6                                     | -1.760248000 | 1.228973000  | -0.088168000 | 6                                     | -1.265776000 | 0.357963000  | -0.032298000 |



|                                   |               |              |              |                                   |               |              |              |
|-----------------------------------|---------------|--------------|--------------|-----------------------------------|---------------|--------------|--------------|
| 8                                 | -1.899367000  | -0.008602000 | -0.046781000 | 8                                 | -1.321199000  | -0.886614000 | -0.015991000 |
| 8                                 | -0.749448000  | 1.924576000  | -0.132070000 | 8                                 | -2.161642000  | 1.201253000  | -0.029209000 |
| 7                                 | 0.629094000   | -1.287899000 | -0.231862000 | 7                                 | -3.992969000  | -1.781548000 | 0.147424000  |
| 1                                 | -0.272138000  | -0.799370000 | -0.165346000 | 1                                 | -3.025906000  | -1.434468000 | 0.087622000  |
| 1                                 | 0.627758000   | -2.291594000 | -0.175461000 | 1                                 | -4.144543000  | -2.774902000 | 0.120093000  |
| 6                                 | 1.791874000   | -0.629268000 | -0.133427000 | 6                                 | -5.041691000  | -0.954476000 | 0.058547000  |
| 7                                 | 2.935842000   | -1.338938000 | -0.105559000 | 7                                 | -6.282522000  | -1.481547000 | 0.054722000  |
| 1                                 | 2.882439000   | -2.344830000 | -0.168260000 | 1                                 | -6.381394000  | -2.483013000 | 0.130549000  |
| 7                                 | 1.808181000   | 0.686240000  | -0.078303000 | 7                                 | -4.857791000  | 0.347347000  | -0.012779000 |
| 1                                 | 0.929948000   | 1.211758000  | -0.097820000 | 1                                 | -3.907736000  | 0.732910000  | -0.018773000 |
| 1                                 | 2.731336000   | 1.113780000  | -0.024388000 | 1                                 | -5.704728000  | 0.910383000  | -0.062031000 |
| 6                                 | 4.313932000   | -0.839035000 | -0.028803000 | 6                                 | -7.567305000  | -0.779887000 | -0.009147000 |
| 8                                 | 5.145084000   | -1.742660000 | -0.028458000 | 8                                 | -8.528172000  | -1.545041000 | 0.016024000  |
| 8                                 | 4.442269000   | 0.397222000  | 0.025808000  | 8                                 | -7.509197000  | 0.461443000  | -0.079870000 |
| 7                                 | 7.219094000   | 1.060433000  | 0.436041000  | 7                                 | -10.147280000 | 1.549802000  | -0.417442000 |
| 1                                 | 6.245029000   | 0.783163000  | 0.285513000  | 1                                 | -9.223842000  | 1.122206000  | -0.296907000 |
| 1                                 | 7.423464000   | 2.043852000  | 0.386933000  | 1                                 | -10.193602000 | 2.552725000  | -0.360112000 |
| 6                                 | 8.224369000   | 0.193552000  | 0.188163000  | 6                                 | -11.267657000 | 0.850107000  | -0.138609000 |
| 7                                 | 9.484061000   | 0.634767000  | 0.165944000  | 7                                 | -12.441622000 | 1.484021000  | -0.078608000 |
| 1                                 | 9.655770000   | 1.608969000  | 0.365328000  | 1                                 | -12.463458000 | 2.473687000  | -0.274201000 |
| 7                                 | 7.953648000   | -1.084758000 | -0.003505000 | 7                                 | -11.195297000 | -0.455587000 | 0.044683000  |
| 1                                 | 6.987367000   | -1.410378000 | -0.014825000 | 1                                 | -10.290726000 | -0.927572000 | 0.035779000  |
| 1                                 | 8.774600000   | -1.674430000 | -0.159595000 | 1                                 | -12.092533000 | -0.909551000 | 0.230080000  |
| 6                                 | 10.764552000  | -0.172818000 | -0.034781000 | 6                                 | -13.824742000 | 0.889799000  | 0.168868000  |
| 8                                 | 10.569042000  | -1.373361000 | -0.242304000 | 8                                 | -13.816191000 | -0.327217000 | 0.372803000  |
| 8                                 | 11.746606000  | 0.542858000  | 0.049411000  | 8                                 | -14.684000000 | 1.752375000  | 0.117425000  |
| 7                                 | -11.334728000 | -1.536398000 | 0.094610000  | 7                                 | 14.296531000  | 2.058514000  | 0.075603000  |
| 1                                 | -11.734550000 | -2.459799000 | 0.065557000  | 1                                 | 14.642631000  | 3.003606000  | 0.055203000  |
| 1                                 | -11.956908000 | -0.756746000 | -0.040302000 | 1                                 | 14.963854000  | 1.316170000  | -0.054051000 |
| 6                                 | -10.001874000 | -1.362906000 | 0.086182000  | 6                                 | 12.976595000  | 1.807365000  | 0.075590000  |
| 7                                 | -9.506489000  | -0.128503000 | -0.015443000 | 7                                 | 12.554017000  | 0.545475000  | -0.021894000 |
| 1                                 | -10.141645000 | 0.652845000  | -0.104579000 | 1                                 | 13.233954000  | -0.197212000 | -0.111731000 |
| 7                                 | -9.193070000  | -2.404374000 | 0.183328000  | 7                                 | 12.108454000  | 2.799566000  | 0.175786000  |
| 1                                 | -9.550513000  | -3.334154000 | 0.324239000  | 1                                 | 12.411145000  | 3.749700000  | 0.309175000  |
| 1                                 | -8.191007000  | -2.185080000 | 0.209089000  | 1                                 | 11.121121000  | 2.523100000  | 0.204354000  |
| 6                                 | -8.077789000  | 0.272569000  | 0.012636000  | 6                                 | 11.153137000  | 0.060786000  | 0.012410000  |
| 8                                 | -7.267578000  | -0.659911000 | 0.129563000  | 8                                 | 10.287788000  | 0.942643000  | 0.129190000  |
| 8                                 | -7.932585000  | 1.482696000  | -0.087286000 | 8                                 | 11.079704000  | -1.156571000 | -0.083090000 |
|                                   |               |              |              | 7                                 | 8.483950000   | -2.304415000 | -0.010079000 |
|                                   |               |              |              | 1                                 | 9.440177000   | -1.936134000 | -0.032630000 |
|                                   |               |              |              | 1                                 | 8.344109000   | -3.297534000 | -0.082570000 |
|                                   |               |              |              | 6                                 | 7.434246000   | -1.478392000 | -0.014625000 |
|                                   |               |              |              | 7                                 | 6.193684000   | -2.003686000 | -0.054094000 |
|                                   |               |              |              | 1                                 | 6.094721000   | -3.008169000 | -0.081873000 |
|                                   |               |              |              | 7                                 | 7.612019000   | -0.172193000 | 0.023819000  |
|                                   |               |              |              | 1                                 | 8.548103000   | 0.232631000  | 0.066505000  |
|                                   |               |              |              | 1                                 | 6.761518000   | 0.388507000  | 0.031728000  |
|                                   |               |              |              | 6                                 | 4.914526000   | -1.300784000 | -0.047783000 |
|                                   |               |              |              | 8                                 | 4.968695000   | -0.056233000 | -0.004797000 |
|                                   |               |              |              | 8                                 | 3.949741000   | -2.060901000 | -0.087661000 |
| (G-CO <sub>2</sub> ) <sub>6</sub> |               |              |              | (G-CO <sub>2</sub> ) <sub>7</sub> |               |              |              |

| SCF E = -2363.77541743 a.u. |               |              |              | SCF E = -2757.75070394 a. u. |               |              |              |
|-----------------------------|---------------|--------------|--------------|------------------------------|---------------|--------------|--------------|
| 7                           | 5.475330000   | 1.070099000  | -0.040671000 | 7                            | -8.408807000  | 1.005059000  | -0.399152000 |
| 1                           | 6.409616000   | 0.636947000  | -0.023851000 | 1                            | -9.360504000  | 0.645405000  | -0.236381000 |
| 1                           | 5.412290000   | 2.071210000  | 0.025981000  | 1                            | -8.305489000  | 1.943584000  | -0.744359000 |
| 6                           | 4.358842000   | 0.335804000  | -0.030677000 | 6                            | -7.329542000  | 0.231083000  | -0.254794000 |
| 7                           | 3.168535000   | 0.975095000  | -0.000168000 | 7                            | -6.116584000  | 0.760901000  | -0.530327000 |
| 1                           | 3.163932000   | 1.984367000  | 0.007183000  | 1                            | -6.068584000  | 1.723805000  | -0.829000000 |
| 7                           | 4.423850000   | -0.977935000 | -0.056094000 | 7                            | -7.450524000  | -1.014739000 | 0.150055000  |
| 1                           | 5.337125000   | -1.446044000 | -0.075547000 | 1                            | -8.379812000  | -1.398524000 | 0.358322000  |
| 1                           | 3.533669000   | -1.469474000 | -0.056719000 | 1                            | -6.585157000  | -1.539515000 | 0.247318000  |
| 6                           | 1.834119000   | 0.397440000  | 0.000994000  | 6                            | -4.812487000  | 0.128865000  | -0.428676000 |
| 8                           | 1.767359000   | -0.847054000 | -0.021471000 | 8                            | -4.797412000  | -1.059810000 | -0.053008000 |
| 8                           | 0.941514000   | 1.245328000  | 0.025207000  | 8                            | -3.886217000  | 0.879804000  | -0.737509000 |
| 7                           | -0.889658000  | -1.740021000 | 0.062971000  | 7                            | -2.202055000  | -2.105695000 | -0.022263000 |
| 1                           | 0.082445000   | -1.396683000 | 0.033651000  | 1                            | -3.155165000  | -1.709782000 | -0.042302000 |
| 1                           | -1.048197000  | -2.731644000 | 0.015864000  | 1                            | -2.085823000  | -3.054747000 | 0.288658000  |
| 6                           | -1.929929000  | -0.902574000 | 0.020945000  | 6                            | -1.125243000  | -1.342373000 | -0.226733000 |
| 7                           | -3.176918000  | -1.423859000 | 0.000813000  | 7                            | 0.097909000   | -1.907057000 | -0.101661000 |
| 1                           | -3.279146000  | -2.427513000 | 0.028648000  | 1                            | 0.152921000   | -2.886481000 | 0.135520000  |
| 7                           | -1.738041000  | 0.399089000  | 0.006961000  | 7                            | -1.257887000  | -0.074426000 | -0.550672000 |
| 1                           | -0.783228000  | 0.778676000  | 0.015283000  | 1                            | -2.195381000  | 0.338963000  | -0.639798000 |
| 1                           | -2.577362000  | 0.972755000  | -0.013884000 | 1                            | -0.394814000  | 0.440310000  | -0.703472000 |
| 6                           | -4.449901000  | -0.719791000 | -0.026883000 | 6                            | 1.398864000   | -1.289329000 | -0.285053000 |
| 8                           | -5.420210000  | -1.477594000 | -0.030675000 | 8                            | 2.335928000   | -2.068139000 | -0.102699000 |
| 8                           | -4.395002000  | 0.525418000  | -0.043499000 | 8                            | 1.403059000   | -0.081173000 | -0.594332000 |
| 7                           | -6.960635000  | 1.663162000  | -0.210637000 | 7                            | 3.991466000   | 0.953195000  | -0.733713000 |
| 1                           | -6.029238000  | 1.226690000  | -0.150441000 | 1                            | 3.039377000   | 0.556589000  | -0.683208000 |
| 1                           | -7.018664000  | 2.666168000  | -0.176766000 | 1                            | 4.094215000   | 1.928349000  | -0.955319000 |
| 6                           | -8.081178000  | 0.938256000  | -0.110895000 | 6                            | 5.077748000   | 0.186672000  | -0.608124000 |
| 7                           | -9.267359000  | 1.580201000  | -0.099301000 | 7                            | 6.293227000   | 0.765341000  | -0.734913000 |
| 1                           | -9.271319000  | 2.586279000  | -0.177500000 | 1                            | 6.336827000   | 1.757892000  | -0.912418000 |
| 7                           | -8.019700000  | -0.374786000 | -0.037885000 | 7                            | 4.961224000   | -1.101121000 | -0.363506000 |
| 1                           | -7.109036000  | -0.847592000 | -0.035607000 | 1                            | 4.029471000   | -1.523001000 | -0.260136000 |
| 1                           | -8.914777000  | -0.856165000 | 0.020263000  | 1                            | 5.832071000   | -1.616783000 | -0.266555000 |
| 6                           | -10.611185000 | 1.004501000  | -0.019378000 | 6                            | 7.604431000   | 0.150018000  | -0.610378000 |
| 8                           | -10.671569000 | -0.236580000 | 0.055112000  | 8                            | 7.624913000   | -1.074194000 | -0.375234000 |
| 8                           | -11.495888000 | 1.857414000  | -0.036882000 | 8                            | 8.528673000   | 0.949829000  | -0.760434000 |
| 7                           | 17.403024000  | 1.986427000  | 0.089370000  | 7                            | -20.254325000 | 2.614424000  | -0.078752000 |
| 1                           | 17.758143000  | 2.928371000  | 0.082790000  | 1                            | -20.568239000 | 3.534708000  | -0.339401000 |
| 1                           | 18.064335000  | 1.239089000  | -0.042455000 | 1                            | -20.935319000 | 1.983109000  | 0.309715000  |
| 6                           | 16.081126000  | 1.747221000  | 0.085631000  | 6                            | -18.947928000 | 2.302207000  | -0.085793000 |
| 7                           | 15.647480000  | 0.489886000  | -0.023948000 | 7                            | -18.561672000 | 1.108568000  | 0.369532000  |
| 1                           | 16.321028000  | -0.257891000 | -0.119648000 | 1                            | -19.257401000 | 0.467674000  | 0.726169000  |
| 7                           | 15.221576000  | 2.746050000  | 0.193666000  | 7                            | -18.057106000 | 3.165985000  | -0.542297000 |
| 1                           | 15.532407000  | 3.692616000  | 0.333642000  | 1                            | -18.336293000 | 4.048298000  | -0.936968000 |
| 1                           | 14.231762000  | 2.478517000  | 0.216947000  | 1                            | -17.084430000 | 2.840880000  | -0.543712000 |
| 6                           | 14.242921000  | 0.017498000  | 0.001383000  | 6                            | -17.185176000 | 0.561074000  | 0.402483000  |
| 8                           | 13.384336000  | 0.905309000  | 0.124152000  | 8                            | -16.300709000 | 1.315421000  | -0.032509000 |
| 8                           | 14.158851000  | -1.198329000 | -0.106153000 | 8                            | -17.145505000 | -0.571182000 | 0.864590000  |
| 7                           | 11.558107000  | -2.327023000 | -0.056759000 | 7                            | -14.612642000 | -1.835687000 | 0.990709000  |
| 1                           | 12.517310000  | -1.965323000 | -0.072155000 | 1                            | -15.550345000 | -1.422025000 | 0.958421000  |
| 1                           | 11.411002000  | -3.318304000 | -0.139491000 |                              |               |              |              |

|                                       |               |              |              |                                       |               |              |              |
|---------------------------------------|---------------|--------------|--------------|---------------------------------------|---------------|--------------|--------------|
| 6                                     | 10.514736000  | -1.493890000 | -0.039366000 | 1                                     | -14.503133000 | -2.762875000 | 1.364214000  |
| 7                                     | 9.269942000   | -2.010461000 | -0.079772000 | 6                                     | -13.538129000 | -1.115667000 | 0.659408000  |
| 1                                     | 9.164561000   | -3.013680000 | -0.124511000 | 7                                     | -12.318038000 | -1.678419000 | 0.775208000  |
| 7                                     | 10.701733000  | -0.189872000 | 0.020622000  | 1                                     | -12.254718000 | -2.629575000 | 1.108150000  |
| 1                                     | 11.641138000  | 0.207967000  | 0.061948000  | 7                                     | -13.671196000 | 0.121244000  | 0.222105000  |
| 1                                     | 9.855912000   | 0.377088000  | 0.041960000  | 1                                     | -14.592174000 | 0.551458000  | 0.125177000  |
| 6                                     | 7.996542000   | -1.300530000 | -0.055224000 | 1                                     | -12.805567000 | 0.599699000  | -0.020745000 |
| 8                                     | 8.057440000   | -0.056930000 | 0.007397000  | 6                                     | -11.020784000 | -1.093611000 | 0.459809000  |
| 8                                     | 7.025952000   | -2.053578000 | -0.101797000 | 8                                     | -11.030462000 | 0.078199000  | 0.034160000  |
| 7                                     | -13.392102000 | -1.065834000 | 0.443770000  | 8                                     | -10.083742000 | -1.862408000 | 0.666314000  |
| 1                                     | -12.434219000 | -0.729361000 | 0.302361000  | 7                                     | 10.268488000  | -2.028567000 | -0.305779000 |
| 1                                     | -13.536019000 | -2.059944000 | 0.396222000  | 1                                     | 9.308275000   | -1.654975000 | -0.341078000 |
| 6                                     | -14.446015000 | -0.262538000 | 0.187683000  | 1                                     | 10.387154000  | -3.002235000 | -0.085349000 |
| 7                                     | -15.676978000 | -0.780668000 | 0.159818000  | 6                                     | 11.333071000  | -1.217406000 | -0.270768000 |
| 1                                     | -15.789223000 | -1.762180000 | 0.365309000  | 7                                     | 12.554300000  | -1.763656000 | -0.089994000 |
| 7                                     | -14.252617000 | 1.029233000  | -0.006102000 | 1                                     | 12.623563000  | -2.765955000 | 0.002332000  |
| 1                                     | -13.306497000 | 1.411702000  | -0.019897000 | 7                                     | 11.185656000  | 0.080906000  | -0.423152000 |
| 1                                     | -15.106058000 | 1.567322000  | -0.171422000 | 1                                     | 10.248408000  | 0.477375000  | -0.558221000 |
| 6                                     | -17.002027000 | -0.056429000 | -0.051349000 | 1                                     | 12.042471000  | 0.630333000  | -0.406573000 |
| 8                                     | -16.882213000 | 1.153050000  | -0.265458000 | 6                                     | 13.850034000  | -1.086923000 | -0.044987000 |
| 8                                     | -17.939441000 | -0.830864000 | 0.032577000  | 8                                     | 13.829465000  | 0.147143000  | -0.182063000 |
|                                       |               |              |              | 8                                     | 14.788705000  | -1.867041000 | 0.127012000  |
|                                       |               |              |              | 7                                     | 17.340522000  | -0.613495000 | 0.167146000  |
|                                       |               |              |              | 1                                     | 16.420267000  | -1.068141000 | 0.134696000  |
|                                       |               |              |              | 1                                     | 18.132438000  | -1.194448000 | 0.383135000  |
|                                       |               |              |              | 6                                     | 17.428755000  | 0.703155000  | 0.445589000  |
|                                       |               |              |              | 7                                     | 18.617046000  | 1.240023000  | 0.737139000  |
|                                       |               |              |              | 1                                     | 19.429826000  | 0.642292000  | 0.722040000  |
|                                       |               |              |              | 7                                     | 16.342281000  | 1.453953000  | 0.406136000  |
|                                       |               |              |              | 1                                     | 15.434916000  | 1.045346000  | 0.179837000  |
|                                       |               |              |              | 1                                     | 16.504836000  | 2.446226000  | 0.592320000  |
|                                       |               |              |              | 6                                     | 18.952359000  | 2.701530000  | 1.007961000  |
|                                       |               |              |              | 8                                     | 17.972249000  | 3.451832000  | 0.990719000  |
|                                       |               |              |              | 8                                     | 20.148114000  | 2.847196000  | 1.194542000  |
| <b>(G-CO<sub>2</sub>)<sub>8</sub></b> |               |              |              | <b>(G-CO<sub>2</sub>)<sub>9</sub></b> |               |              |              |
| <b>SCF E = -3151.72598607 a.u.</b>    |               |              |              | <b>SCF E = -3545.70135987 a.u.</b>    |               |              |              |
| 7                                     | -5.755295000  | -0.349533000 | 0.075222000  | 7                                     | -2.912105000  | -1.547241000 | -0.421332000 |
| 1                                     | -6.673794000  | -0.822736000 | 0.095225000  | 1                                     | -3.784908000  | -2.079928000 | -0.263524000 |
| 1                                     | -5.733898000  | 0.651387000  | -0.016131000 | 1                                     | -2.975864000  | -0.553588000 | -0.560611000 |
| 6                                     | -4.611655000  | -1.037858000 | 0.064630000  | 6                                     | -1.712745000  | -2.121216000 | -0.307552000 |
| 7                                     | -3.448052000  | -0.350442000 | -0.011319000 | 7                                     | -0.612094000  | -1.348293000 | -0.467180000 |
| 1                                     | -3.487871000  | 0.657130000  | -0.052212000 | 1                                     | -0.740273000  | -0.369856000 | -0.678522000 |
| 7                                     | -4.621858000  | -2.351433000 | 0.131888000  | 7                                     | -1.608870000  | -3.407586000 | -0.054089000 |
| 1                                     | -5.516740000  | -2.856192000 | 0.186716000  | 1                                     | -2.457386000  | -3.976847000 | 0.074249000  |
| 1                                     | -3.713775000  | -2.807372000 | 0.127879000  | 1                                     | -0.664666000  | -3.776845000 | 0.010835000  |
| 6                                     | -2.093684000  | -0.868202000 | -0.024964000 | 6                                     | 0.781353000   | -1.739479000 | -0.402779000 |
| 8                                     | -1.967936000  | -2.107473000 | 0.034183000  | 8                                     | 1.015676000   | -2.939838000 | -0.157948000 |
| 8                                     | -1.237527000  | 0.016049000  | -0.095540000 | 8                                     | 1.558515000   | -0.803339000 | -0.604301000 |
| 7                                     | 0.708331000   | -2.891008000 | -0.062786000 | 7                                     | 3.745807000   | -3.492103000 | -0.130327000 |
| 1                                     | -0.279434000  | -2.589343000 | -0.029026000 | 1                                     | 2.734575000   | -3.277009000 | -0.146480000 |

|   |               |              |              |   |               |              |              |
|---|---------------|--------------|--------------|---|---------------|--------------|--------------|
| 1 | 0.912404000   | -3.873115000 | 0.004471000  | 1 | 4.033008000   | -4.427570000 | 0.100310000  |
| 6 | 1.709029000   | -2.007724000 | -0.086104000 | 6 | 4.665459000   | -2.534536000 | -0.269102000 |
| 7 | 2.980186000   | -2.473627000 | -0.082848000 | 7 | 5.972146000   | -2.878025000 | -0.177272000 |
| 1 | 3.125513000   | -3.472190000 | -0.069154000 | 1 | 6.203353000   | -3.847916000 | -0.021483000 |
| 7 | 1.459167000   | -0.716777000 | -0.117265000 | 7 | 4.304683000   | -1.290646000 | -0.497494000 |
| 1 | 0.486277000   | -0.380379000 | -0.113418000 | 1 | 3.305727000   | -1.045644000 | -0.551614000 |
| 1 | 2.270270000   | -0.105025000 | -0.142000000 | 1 | 5.059186000   | -0.617691000 | -0.598773000 |
| 6 | 4.217186000   | -1.716668000 | -0.115861000 | 6 | 7.138697000   | -2.026104000 | -0.303242000 |
| 8 | 5.223353000   | -2.428354000 | -0.108270000 | 8 | 8.202680000   | -2.637111000 | -0.184006000 |
| 8 | 4.110217000   | -0.474277000 | -0.146394000 | 8 | 6.925790000   | -0.814577000 | -0.510358000 |
| 7 | 6.587248000   | 0.799865000  | -0.095108000 | 7 | 9.282976000   | 0.637768000  | -0.807266000 |
| 1 | 5.674991000   | 0.315003000  | -0.112196000 | 1 | 8.415333000   | 0.086774000  | -0.698533000 |
| 1 | 6.596839000   | 1.804110000  | -0.141082000 | 1 | 9.205409000   | 1.631697000  | -0.937225000 |
| 6 | 7.738069000   | 0.126404000  | -0.168992000 | 6 | 10.485706000  | 0.092049000  | -0.609701000 |
| 7 | 8.893489000   | 0.827866000  | -0.214048000 | 7 | 11.576097000  | 0.888176000  | -0.692774000 |
| 1 | 8.845346000   | 1.835292000  | -0.177932000 | 1 | 11.442474000  | 1.864031000  | -0.912734000 |
| 7 | 7.741284000   | -1.189303000 | -0.189556000 | 7 | 10.601243000  | -1.192771000 | -0.350567000 |
| 1 | 6.853091000   | -1.707039000 | -0.160030000 | 1 | 9.760505000   | -1.781341000 | -0.278627000 |
| 1 | 8.655240000   | -1.632117000 | -0.233969000 | 1 | 11.548471000  | -1.537791000 | -0.220137000 |
| 6 | 10.255213000  | 0.323847000  | -0.274176000 | 6 | 12.973702000  | 0.526350000  | -0.529914000 |
| 8 | 10.390095000  | -0.915366000 | -0.300837000 | 8 | 13.213251000  | -0.668982000 | -0.268114000 |
| 8 | 11.100690000  | 1.219280000  | -0.291579000 | 8 | 13.739709000  | 1.479543000  | -0.677893000 |
| 7 | -17.649266000 | 0.034036000  | 0.201341000  | 7 | -14.750487000 | -2.076993000 | 0.483230000  |
| 1 | -18.082879000 | 0.959008000  | 0.135368000  | 1 | -15.265117000 | -1.190698000 | 0.373684000  |
| 1 | -18.246360000 | -0.759839000 | 0.356734000  | 1 | -15.259102000 | -2.889113000 | 0.787551000  |
| 6 | -16.322315000 | -0.128966000 | 0.153917000  | 6 | -13.421329000 | -2.135005000 | 0.364162000  |
| 7 | -15.821968000 | -1.375285000 | 0.281534000  | 7 | -12.807183000 | -3.320912000 | 0.582626000  |
| 1 | -16.463953000 | -2.144506000 | 0.405453000  | 1 | -13.375840000 | -4.120619000 | 0.818507000  |
| 7 | -15.527988000 | 0.906533000  | -0.016101000 | 7 | -12.732645000 | -1.063881000 | 0.035998000  |
| 1 | -15.920788000 | 1.844422000  | -0.116047000 | 1 | -13.215502000 | -0.170883000 | -0.121861000 |
| 1 | -14.530789000 | 0.704121000  | -0.050934000 | 1 | -11.726766000 | -1.185619000 | -0.047824000 |
| 6 | -14.424947000 | -1.789192000 | 0.249127000  | 6 | -11.391790000 | -3.627102000 | 0.497051000  |
| 8 | -13.584149000 | -0.886972000 | 0.088966000  | 8 | -10.633966000 | -2.688061000 | 0.193314000  |
| 8 | -14.281797000 | -3.005169000 | 0.389300000  | 8 | -11.136964000 | -4.809746000 | 0.745675000  |
| 7 | -11.673999000 | -3.966418000 | 0.320601000  | 7 | -8.480824000  | -5.549428000 | 0.598463000  |
| 1 | -12.653120000 | -3.638826000 | 0.343763000  | 1 | -9.483834000  | -5.296383000 | 0.651017000  |
| 1 | -11.485041000 | -4.946299000 | 0.443311000  | 1 | -8.204698000  | -6.492114000 | 0.813038000  |
| 6 | -10.664664000 | -3.097106000 | 0.257672000  | 6 | -7.550564000  | -4.615024000 | 0.402006000  |
| 7 | -9.397680000  | -3.570293000 | 0.292639000  | 7 | -6.247545000  | -4.984409000 | 0.416107000  |
| 1 | -9.259585000  | -4.567874000 | 0.360783000  | 1 | -6.027236000  | -5.957716000 | 0.566942000  |
| 7 | -10.901054000 | -1.805210000 | 0.157987000  | 7 | -7.896115000  | -3.362108000 | 0.191819000  |
| 1 | -11.862934000 | -1.448090000 | 0.128029000  | 1 | -8.886764000  | -3.086506000 | 0.182266000  |
| 1 | -10.081395000 | -1.206127000 | 0.102924000  | 1 | -7.132893000  | -2.708783000 | 0.038760000  |
| 6 | -8.154870000  | -2.824853000 | 0.221195000  | 6 | -5.074789000  | -4.158777000 | 0.212155000  |
| 8 | -8.252467000  | -1.584828000 | 0.122743000  | 8 | -5.273978000  | -2.943885000 | 0.007499000  |
| 8 | -7.154401000  | -3.541903000 | 0.269946000  | 8 | -4.017479000  | -4.789852000 | 0.271884000  |
| 7 | 13.102823000  | -1.615768000 | -0.514113000 | 7 | 15.980265000  | -1.121332000 | -0.114916000 |
| 1 | 12.114501000  | -1.331908000 | -0.437463000 | 1 | 14.968888000  | -0.929715000 | -0.178260000 |
| 1 | 13.315959000  | -2.597788000 | -0.487697000 | 1 | 16.270015000  | -2.049706000 | 0.139505000  |
| 6 | 14.098444000  | -0.727084000 | -0.412331000 | 6 | 16.882540000  | -0.132720000 | -0.117844000 |
| 7 | 15.370334000  | -1.180352000 | -0.417079000 | 7 | 18.181060000  | -0.444385000 | 0.082234000  |
| 1 | 15.526427000  | -2.172635000 | -0.511479000 | 1 | 18.427435000  | -1.413688000 | 0.214998000  |
| 7 | 13.836207000  | 0.558872000  | -0.321788000 | 7 | 16.506536000  | 1.110957000  | -0.323854000 |

|   |               |              |              |   |               |              |              |
|---|---------------|--------------|--------------|---|---------------|--------------|--------------|
| 1 | 12.862063000  | 0.882916000  | -0.310591000 | 1 | 15.513282000  | 1.328390000  | -0.467386000 |
| 1 | 14.644916000  | 1.174651000  | -0.267170000 | 1 | 17.250909000  | 1.805048000  | -0.331612000 |
| 6 | 16.607207000  | -0.403549000 | -0.348399000 | 6 | 19.335237000  | 0.452883000  | 0.093626000  |
| 8 | 16.477422000  | 0.828473000  | -0.261652000 | 8 | 19.096664000  | 1.657156000  | -0.093448000 |
| 8 | 17.616343000  | -1.110366000 | -0.388630000 | 8 | 20.397433000  | -0.140425000 | 0.292539000  |
| 7 | 20.051372000  | 0.356055000  | -0.366426000 | 7 | 22.688165000  | 1.537423000  | 0.224726000  |
| 1 | 19.171666000  | -0.173447000 | -0.387732000 | 1 | 21.860781000  | 0.928775000  | 0.234565000  |
| 1 | 20.906269000  | -0.172430000 | -0.334528000 | 1 | 23.572316000  | 1.115050000  | 0.450844000  |
| 6 | 20.067070000  | 1.614240000  | 0.118365000  | 6 | 22.549602000  | 2.862506000  | 0.432969000  |
| 7 | 21.234984000  | 2.209498000  | 0.377460000  | 7 | 23.630483000  | 3.611888000  | 0.669150000  |
| 1 | 22.085156000  | 1.701532000  | 0.184421000  | 1 | 24.534411000  | 3.163557000  | 0.665485000  |
| 7 | 18.927550000  | 2.254148000  | 0.312686000  | 7 | 21.348586000  | 3.410638000  | 0.380197000  |
| 1 | 18.035599000  | 1.802870000  | 0.106785000  | 1 | 20.523200000  | 2.839240000  | 0.195823000  |
| 1 | 19.031679000  | 3.215758000  | 0.644284000  | 1 | 21.338351000  | 4.424709000  | 0.510902000  |
| 6 | 21.483515000  | 3.635431000  | 0.853357000  | 6 | 23.710889000  | 5.121706000  | 0.855319000  |
| 8 | 20.452249000  | 4.282317000  | 1.057791000  | 8 | 22.615493000  | 5.689833000  | 0.821549000  |
| 8 | 22.677716000  | 3.863290000  | 0.942976000  | 8 | 24.865801000  | 5.481654000  | 1.006365000  |
| 7 | -20.134710000 | 6.577502000  | -0.364721000 | 7 | -17.765741000 | 4.125460000  | -0.483050000 |
| 1 | -21.085271000 | 6.907238000  | -0.397250000 | 1 | -18.739407000 | 4.427460000  | -0.388727000 |
| 1 | -19.403747000 | 7.245671000  | -0.545315000 | 1 | -17.076147000 | 4.815758000  | -0.725993000 |
| 6 | -19.860775000 | 5.267691000  | -0.251125000 | 6 | -17.389017000 | 2.866445000  | -0.234771000 |
| 7 | -18.592733000 | 4.858933000  | -0.319865000 | 7 | -16.084541000 | 2.548521000  | -0.359358000 |
| 1 | -17.862026000 | 5.540485000  | -0.474191000 | 1 | -15.435729000 | 3.268301000  | -0.643007000 |
| 7 | -20.837261000 | 4.394140000  | -0.069924000 | 7 | -18.276598000 | 1.960620000  | 0.119171000  |
| 1 | -21.792128000 | 4.690636000  | 0.041229000  | 1 | -19.260555000 | 2.216485000  | 0.219018000  |
| 1 | -20.543255000 | 3.418047000  | 0.039777000  | 1 | -17.915065000 | 1.024299000  | 0.289269000  |
| 6 | -18.080885000 | 3.475929000  | -0.171253000 | 6 | -15.447434000 | 1.255192000  | -0.144746000 |
| 8 | -18.945742000 | 2.604285000  | 0.023836000  | 8 | -16.195192000 | 0.320490000  | 0.202039000  |
| 8 | -16.864671000 | 3.416887000  | -0.267942000 | 8 | -14.233997000 | 1.279261000  | -0.343152000 |
|   |               |              |              | 7 | -24.567820000 | 5.697024000  | 0.230800000  |
|   |               |              |              | 1 | -25.033243000 | 6.587841000  | 0.173956000  |
|   |               |              |              | 1 | -25.111459000 | 4.906696000  | 0.536035000  |
|   |               |              |              | 6 | -23.237089000 | 5.601602000  | 0.076170000  |
|   |               |              |              | 7 | -22.642041000 | 4.422810000  | 0.267541000  |
|   |               |              |              | 1 | -23.201312000 | 3.626553000  | 0.542050000  |
|   |               |              |              | 7 | -22.526657000 | 6.663310000  | -0.265973000 |
|   |               |              |              | 1 | -22.965903000 | 7.545916000  | -0.466473000 |
|   |               |              |              | 1 | -21.522393000 | 6.501607000  | -0.394659000 |
|   |               |              |              | 6 | -21.204824000 | 4.100385000  | 0.102894000  |
|   |               |              |              | 8 | -20.480457000 | 5.051685000  | -0.237657000 |
|   |               |              |              | 8 | -20.960809000 | 2.926081000  | 0.334511000  |

**Cartesian coordinates of cyclic structures of (G-CO<sub>2</sub>)<sub>n</sub> complexes.**

|                                       |              |              |              |                                       |              |              |              |
|---------------------------------------|--------------|--------------|--------------|---------------------------------------|--------------|--------------|--------------|
| <b>(G-CO<sub>2</sub>)<sub>2</sub></b> |              |              |              | <b>(G-CO<sub>2</sub>)<sub>3</sub></b> |              |              |              |
| <b>SCF E = -787.915203086 a.u.</b>    |              |              |              | <b>SCF E = -1181.89142049 a.u.</b>    |              |              |              |
| 7                                     | 2.318321000  | -2.036369000 | 0.205439000  | 7                                     | 4.130557000  | 0.772942000  | -0.471425000 |
| 1                                     | 2.992737000  | -2.663081000 | 0.608451000  | 1                                     | 4.912711000  | 0.878518000  | -1.096567000 |
| 1                                     | 1.403706000  | -2.382587000 | -0.090175000 | 1                                     | 3.555791000  | 1.611934000  | -0.293378000 |
| 6                                     | 2.536563000  | -0.716214000 | 0.172689000  | 6                                     | 3.580862000  | -0.437715000 | -0.330298000 |
| 7                                     | 1.642476000  | 0.043842000  | -0.456434000 | 7                                     | 2.532865000  | -0.574501000 | 0.482755000  |
| 1                                     | 0.861527000  | -0.492033000 | -0.844886000 | 1                                     | 2.204710000  | 0.258868000  | 0.989785000  |
| 7                                     | 3.624757000  | -0.174058000 | 0.719073000  | 7                                     | 4.098502000  | -1.506175000 | -0.941791000 |
| 1                                     | 4.185451000  | -0.706233000 | 1.362064000  | 1                                     | 4.759842000  | -1.382088000 | -1.688990000 |
| 1                                     | 3.628744000  | 0.850411000  | 0.724390000  | 1                                     | 3.531645000  | -2.354925000 | -0.874147000 |
| 6                                     | 1.472005000  | 1.505395000  | -0.306934000 | 6                                     | 1.643980000  | -1.721872000 | 0.584687000  |
| 8                                     | 2.408601000  | 2.113756000  | 0.199692000  | 8                                     | 1.876068000  | -2.696259000 | -0.159580000 |
| 8                                     | 0.361673000  | 1.880602000  | -0.726057000 | 8                                     | 0.727882000  | -1.550514000 | 1.391916000  |
| 7                                     | -2.318300000 | 2.036348000  | 0.204775000  | 7                                     | -0.950474000 | -2.764046000 | -0.904086000 |
| 1                                     | -2.992582000 | 2.663008000  | 0.608096000  | 1                                     | -0.091876000 | -3.062405000 | -0.436018000 |
| 1                                     | -1.403498000 | 2.382467000  | -0.090406000 | 1                                     | -0.837078000 | -2.517049000 | -1.873922000 |
| 6                                     | -2.536597000 | 0.716208000  | 0.171888000  | 6                                     | -1.914763000 | -2.150304000 | -0.203412000 |
| 7                                     | -1.642483000 | -0.043830000 | -0.457231000 | 7                                     | -2.910567000 | -1.521224000 | -0.863602000 |
| 1                                     | -0.861456000 | 0.492039000  | -0.845516000 | 1                                     | -2.867261000 | -1.535118000 | -1.873290000 |
| 7                                     | -3.624852000 | 0.174029000  | 0.718121000  | 7                                     | -1.906799000 | -2.205266000 | 1.117519000  |
| 1                                     | -4.185610000 | 0.706157000  | 1.361093000  | 1                                     | -0.981476000 | -2.277083000 | 1.545746000  |
| 1                                     | -3.628873000 | -0.850438000 | 0.723336000  | 1                                     | -2.628068000 | -1.645904000 | 1.567124000  |
| 6                                     | -1.471977000 | -1.505376000 | -0.307627000 | 6                                     | -3.585342000 | -0.305945000 | -0.353234000 |
| 8                                     | -2.408750000 | -2.113789000 | 0.198605000  | 8                                     | -3.912110000 | 0.470176000  | -1.250627000 |
| 8                                     | -0.361466000 | -1.880511000 | -0.726333000 | 8                                     | -3.668876000 | -0.208001000 | 0.880378000  |
|                                       |              |              |              | 7                                     | -2.298965000 | 2.744613000  | -0.609629000 |
|                                       |              |              |              | 1                                     | -3.093075000 | 2.100334000  | -0.696138000 |
|                                       |              |              |              | 1                                     | -2.164078000 | 3.370339000  | -1.387097000 |
|                                       |              |              |              | 6                                     | -1.214799000 | 2.339658000  | 0.071936000  |
|                                       |              |              |              | 7                                     | -0.023307000 | 2.919734000  | -0.194041000 |
|                                       |              |              |              | 1                                     | 0.035128000  | 3.519323000  | -1.004470000 |
|                                       |              |              |              | 7                                     | -1.324256000 | 1.404666000  | 0.992290000  |
|                                       |              |              |              | 1                                     | -2.229713000 | 0.972274000  | 1.180661000  |
|                                       |              |              |              | 1                                     | -0.472350000 | 1.128159000  | 1.480194000  |
|                                       |              |              |              | 6                                     | 1.282759000  | 2.467768000  | 0.283164000  |
|                                       |              |              |              | 8                                     | 2.222537000  | 2.844179000  | -0.422935000 |
|                                       |              |              |              | 8                                     | 1.276509000  | 1.751681000  | 1.296789000  |
| <b>(G-CO<sub>2</sub>)<sub>4</sub></b> |              |              |              | <b>(G-CO<sub>2</sub>)<sub>5</sub></b> |              |              |              |
| <b>SCF E = -1575.88150241 a.u.</b>    |              |              |              | <b>SCF E = -1969.86686571 a.u.</b>    |              |              |              |
| 7                                     | -1.284800000 | -3.201277000 | 1.030928000  | 7                                     | -3.701244000 | -2.235298000 | 0.896281000  |
| 1                                     | -2.133477000 | -2.642972000 | 1.194899000  | 1                                     | -4.034998000 | -1.269087000 | 1.029316000  |
| 1                                     | -0.417948000 | -3.026482000 | 1.533415000  | 1                                     | -2.852684000 | -2.587961000 | 1.330800000  |
| 6                                     | -1.168825000 | -3.911003000 | -0.070501000 | 6                                     | -4.210189000 | -2.984439000 | -0.056502000 |
| 7                                     | 0.027193000  | -4.432111000 | -0.437733000 | 7                                     | -3.652465000 | -4.178882000 | -0.376556000 |
| 1                                     | 0.068438000  | -4.948566000 | -1.304350000 | 1                                     | -4.068773000 | -4.711280000 | -1.126263000 |
| 7                                     | -2.241748000 | -4.158156000 | -0.831780000 | 7                                     | -5.308948000 | -2.593152000 | -0.709919000 |
| 1                                     | -3.101802000 | -3.606660000 | -0.692302000 | 1                                     | -5.656045000 | -1.625157000 | -0.603083000 |

|   |              |              |              |   |              |              |              |
|---|--------------|--------------|--------------|---|--------------|--------------|--------------|
| 1 | -2.103952000 | -4.554294000 | -1.746728000 | 1 | -5.598143000 | -3.101730000 | -1.528453000 |
| 6 | 1.338125000  | -3.999501000 | 0.028182000  | 6 | -2.347030000 | -4.672165000 | 0.020876000  |
| 8 | 1.361375000  | -3.358901000 | 1.095827000  | 8 | -1.779795000 | -4.060006000 | 0.946129000  |
| 8 | 2.260261000  | -4.316761000 | -0.727415000 | 8 | -1.963770000 | -5.645373000 | -0.635389000 |
| 7 | 3.201709000  | -1.284739000 | 1.030745000  | 7 | 0.983208000  | -4.210669000 | 0.894354000  |
| 1 | 2.643425000  | -2.133413000 | 1.194810000  | 1 | -0.038900000 | -4.228930000 | 1.027870000  |
| 1 | 3.027069000  | -0.417905000 | 1.533320000  | 1 | 1.581647000  | -3.513346000 | 1.329150000  |
| 6 | 3.911302000  | -1.168786000 | -0.070771000 | 6 | 1.537743000  | -4.925804000 | -0.059137000 |
| 7 | 4.432347000  | 0.027247000  | -0.437983000 | 7 | 2.845975000  | -4.764693000 | -0.379590000 |
| 1 | 4.948720000  | 0.068610000  | -1.304644000 | 1 | 3.223264000  | -5.324766000 | -1.129782000 |
| 7 | 4.158330000  | -2.241698000 | -0.832108000 | 7 | 0.825643000  | -5.849129000 | -0.713134000 |
| 1 | 3.606772000  | -3.101705000 | -0.692589000 | 1 | -0.202076000 | -5.879965000 | -0.605803000 |
| 1 | 4.554360000  | -2.103895000 | -1.747101000 | 1 | 1.219465000  | -6.280186000 | -1.532484000 |
| 6 | 3.999646000  | 1.338059000  | 0.028142000  | 6 | 3.718903000  | -3.676408000 | 0.019207000  |
| 8 | 4.317062000  | 2.260384000  | -0.727160000 | 8 | 4.763049000  | -3.611939000 | -0.636780000 |
| 8 | 3.358677000  | 1.360954000  | 1.095574000  | 8 | 3.311940000  | -2.948900000 | 0.945279000  |
| 7 | 1.284511000  | 3.201304000  | 1.030639000  | 7 | 4.308157000  | -0.367225000 | 0.896216000  |
| 1 | 2.133145000  | 2.642964000  | 1.194739000  | 1 | 4.009955000  | -1.345097000 | 1.028796000  |
| 1 | 0.417563000  | 3.026512000  | 1.532956000  | 1 | 3.829148000  | 0.416854000  | 1.331023000  |
| 6 | 1.168774000  | 3.911084000  | -0.070781000 | 6 | 5.160497000  | -0.059955000 | -0.056232000 |
| 7 | -0.027202000 | 4.432180000  | -0.438076000 | 7 | 5.412017000  | 1.234302000  | -0.375353000 |
| 1 | -0.068491000 | 4.948668000  | -1.304672000 | 1 | 6.061887000  | 1.420427000  | -1.124932000 |
| 7 | 2.241815000  | 4.158250000  | -0.831892000 | 7 | 5.819193000  | -1.022018000 | -0.710355000 |
| 1 | 3.101838000  | 3.606743000  | -0.692282000 | 1 | 5.530648000  | -2.009112000 | -0.604613000 |
| 1 | 2.104171000  | 4.554414000  | -1.746850000 | 1 | 6.352591000  | -0.779894000 | -1.528351000 |
| 6 | -1.338027000 | 3.999449000  | 0.027963000  | 6 | 4.645930000  | 2.400674000  | 0.022493000  |
| 8 | -1.360949000 | 3.358631000  | 1.095481000  | 8 | 3.826985000  | 2.238413000  | 0.947434000  |
| 8 | -2.260333000 | 4.316860000  | -0.727365000 | 8 | 4.907995000  | 3.413602000  | -0.633285000 |
| 7 | -4.158392000 | 2.241792000  | -0.831984000 | 7 | 2.770881000  | 5.217876000  | -0.711376000 |
| 1 | -3.606812000 | 3.101782000  | -0.692455000 | 1 | 3.620462000  | 4.638644000  | -0.604200000 |
| 1 | -4.554617000 | 2.104122000  | -1.746913000 | 1 | 2.706072000  | 5.798666000  | -1.530371000 |
| 6 | -3.911228000 | 1.168771000  | -0.070841000 | 6 | 1.651792000  | 4.888827000  | -0.058116000 |
| 7 | -4.432407000 | -0.027197000 | -0.438065000 | 7 | 0.498660000  | 5.527286000  | -0.378859000 |
| 1 | -4.948910000 | -0.068486000 | -1.304651000 | 1 | 0.522880000  | 6.202149000  | -1.129071000 |
| 7 | -3.201367000 | 1.284525000  | 1.030524000  | 7 | 1.680034000  | 3.984004000  | 0.895047000  |
| 1 | -2.643001000 | 2.133148000  | 1.194590000  | 1 | 2.517791000  | 3.398288000  | 1.028718000  |
| 1 | -3.026574000 | 0.417584000  | 1.532857000  | 1 | 0.785976000  | 3.771062000  | 1.329331000  |
| 6 | -3.999774000 | -1.338041000 | 0.028018000  | 6 | -0.847500000 | 5.159472000  | 0.018817000  |
| 8 | -3.359011000 | -1.360987000 | 1.095568000  | 8 | -0.946562000 | 4.331710000  | 0.944851000  |
| 8 | -4.317059000 | -2.260328000 | -0.727385000 | 8 | -1.729697000 | 5.720857000  | -0.637939000 |
|   |              |              |              | 7 | -4.106996000 | 4.246809000  | -0.712506000 |
|   |              |              |              | 1 | -3.293187000 | 4.875540000  | -0.606382000 |
|   |              |              |              | 1 | -4.680451000 | 4.364742000  | -1.530743000 |
|   |              |              |              | 6 | -4.139893000 | 3.081291000  | -0.058456000 |
|   |              |              |              | 7 | -5.104231000 | 2.182111000  | -0.377416000 |
|   |              |              |              | 1 | -5.739705000 | 2.413482000  | -1.126745000 |
|   |              |              |              | 7 | -3.269764000 | 2.828836000  | 0.893982000  |
|   |              |              |              | 1 | -2.453749000 | 3.444663000  | 1.026731000  |
|   |              |              |              | 1 | -3.343316000 | 1.913057000  | 1.329005000  |
|   |              |              |              | 6 | -5.170251000 | 0.788418000  | 0.021157000  |
|   |              |              |              | 8 | -4.412322000 | 0.438747000  | 0.946244000  |
|   |              |              |              | 8 | -5.977900000 | 0.122686000  | -0.634022000 |

| <b>(G-CO<sub>2</sub>)<sub>6</sub></b><br><b>SCF E = -2363.84963434 a.u.</b> |              |              |              | <b>(G-CO<sub>2</sub>)<sub>7</sub></b><br><b>SCF E = -2757.83062274 a.u.</b> |              |              |              |
|-----------------------------------------------------------------------------|--------------|--------------|--------------|-----------------------------------------------------------------------------|--------------|--------------|--------------|
| 7                                                                           | 2.462740000  | 4.570494000  | 0.692793000  | 7                                                                           | 4.565280000  | 3.999654000  | 0.359911000  |
| 1                                                                           | 3.237850000  | 3.897033000  | 0.793046000  | 1                                                                           | 5.049542000  | 3.090622000  | 0.417498000  |
| 1                                                                           | 1.521228000  | 4.388392000  | 1.029119000  | 1                                                                           | 3.570625000  | 4.115349000  | 0.531150000  |
| 6                                                                           | 2.612414000  | 5.648862000  | -0.043426000 | 6                                                                           | 5.217501000  | 5.077664000  | -0.014647000 |
| 7                                                                           | 1.564183000  | 6.473472000  | -0.294717000 | 7                                                                           | 4.579263000  | 6.267815000  | -0.152193000 |
| 1                                                                           | 1.723401000  | 7.285996000  | -0.871679000 | 1                                                                           | 5.118866000  | 7.070234000  | -0.440534000 |
| 7                                                                           | 3.810132000  | 5.966778000  | -0.541212000 | 7                                                                           | 6.528469000  | 5.025112000  | -0.255298000 |
| 1                                                                           | 4.600579000  | 5.301840000  | -0.468050000 | 1                                                                           | 7.036568000  | 4.121324000  | -0.228397000 |
| 1                                                                           | 3.886622000  | 6.723469000  | -1.199359000 | 1                                                                           | 7.001217000  | 5.833750000  | -0.620810000 |
| 6                                                                           | 0.167413000  | 6.247992000  | 0.011862000  | 6                                                                           | 3.169199000  | 6.546012000  | 0.004531000  |
| 8                                                                           | -0.093547000 | 5.264472000  | 0.731440000  | 8                                                                           | 2.450158000  | 5.599348000  | 0.377975000  |
| 8                                                                           | -0.593022000 | 7.077365000  | -0.498366000 | 8                                                                           | 2.862620000  | 7.713655000  | -0.261478000 |
| 7                                                                           | -2.727895000 | 4.418501000  | 0.692558000  | 7                                                                           | -0.285104000 | 6.059226000  | 0.350081000  |
| 1                                                                           | -1.756867000 | 4.752627000  | 0.791971000  | 1                                                                           | 0.727358000  | 5.868458000  | 0.403037000  |
| 1                                                                           | -3.041168000 | 3.512527000  | 1.029882000  | 1                                                                           | -0.996853000 | 5.355935000  | 0.525815000  |
| 6                                                                           | -3.586821000 | 5.086749000  | -0.044331000 | 6                                                                           | -0.719702000 | 7.240321000  | -0.029331000 |
| 7                                                                           | -4.825296000 | 4.591421000  | -0.294783000 | 7                                                                           | -2.047986000 | 7.485435000  | -0.164926000 |
| 1                                                                           | -5.449185000 | 5.134946000  | -0.872515000 | 1                                                                           | -2.337737000 | 8.406833000  | -0.456915000 |
| 7                                                                           | -3.262904000 | 6.282223000  | -0.543634000 | 7                                                                           | 0.140202000  | 8.229399000  | -0.277219000 |
| 1                                                                           | -2.291724000 | 6.634071000  | -0.470944000 | 1                                                                           | 1.163487000  | 8.063060000  | -0.246420000 |
| 1                                                                           | -3.879960000 | 6.726347000  | -1.202097000 | 1                                                                           | -0.196213000 | 9.102821000  | -0.644514000 |
| 6                                                                           | -5.328693000 | 3.269470000  | 0.013187000  | 6                                                                           | -3.145893000 | 6.558886000  | -0.002656000 |
| 8                                                                           | -4.607696000 | 2.552349000  | 0.733658000  | 8                                                                           | -4.249654000 | 7.047762000  | -0.268743000 |
| 8                                                                           | -6.427128000 | 3.025242000  | -0.496983000 | 8                                                                           | -2.855200000 | 5.407648000  | 0.375303000  |
| 7                                                                           | 3.262655000  | -6.281838000 | -0.543878000 | 7                                                                           | -4.922247000 | 3.558746000  | 0.357922000  |
| 1                                                                           | 2.291512000  | -6.633760000 | -0.471010000 | 1                                                                           | -4.141300000 | 4.231033000  | 0.407989000  |
| 1                                                                           | 3.879556000  | -6.725769000 | -1.202617000 | 1                                                                           | -4.816561000 | 2.564235000  | 0.536484000  |
| 6                                                                           | 3.586770000  | -5.086597000 | -0.044158000 | 6                                                                           | -6.115945000 | 3.954389000  | -0.024537000 |
| 7                                                                           | 4.825259000  | -4.591301000 | -0.294596000 | 7                                                                           | -7.135547000 | 3.068404000  | -0.159218000 |
| 1                                                                           | 5.449044000  | -5.134708000 | -0.872552000 | 1                                                                           | -8.036759000 | 3.415772000  | -0.451373000 |
| 7                                                                           | 2.728025000  | -4.418536000 | 0.693117000  | 7                                                                           | -6.352860000 | 5.242859000  | -0.275784000 |
| 1                                                                           | 1.756905000  | -4.752464000 | 0.792256000  | 1                                                                           | -5.584265000 | 5.938620000  | -0.247652000 |
| 1                                                                           | 3.041421000  | -3.512686000 | 1.030660000  | 1                                                                           | -7.243432000 | 5.522557000  | -0.649462000 |
| 6                                                                           | 5.328730000  | -3.269435000 | 0.013610000  | 6                                                                           | -7.095331000 | 1.632668000  | 0.005910000  |
| 8                                                                           | 4.607863000  | -2.552479000 | 0.734373000  | 8                                                                           | -6.014127000 | 1.143424000  | 0.385844000  |
| 8                                                                           | 6.427075000  | -3.025095000 | -0.496705000 | 8                                                                           | -8.165186000 | 1.073512000  | -0.260191000 |
| 7                                                                           | 7.074262000  | -0.315615000 | -0.539663000 | 7                                                                           | 3.442150000  | -7.469135000 | -0.304562000 |
| 1                                                                           | 6.893138000  | -1.332635000 | -0.467772000 | 1                                                                           | 2.449513000  | -7.766448000 | -0.262327000 |
| 1                                                                           | 7.768401000  | -0.003079000 | -1.196987000 | 1                                                                           | 4.127499000  | -8.115996000 | -0.654801000 |
| 6                                                                           | 6.199803000  | 0.562394000  | -0.041858000 | 6                                                                           | 3.791427000  | -6.209451000 | -0.040460000 |
| 7                                                                           | 6.389966000  | 1.882661000  | -0.292161000 | 7                                                                           | 5.095866000  | -5.856316000 | -0.169591000 |
| 1                                                                           | 7.173365000  | 2.151485000  | -0.868744000 | 1                                                                           | 5.753585000  | -6.557043000 | -0.477118000 |
| 7                                                                           | 5.190611000  | 0.152398000  | 0.693490000  | 7                                                                           | 2.889024000  | -5.335118000 | 0.345713000  |
| 1                                                                           | 4.995115000  | -0.855651000 | 0.793505000  | 1                                                                           | 1.893637000  | -5.601386000 | 0.396601000  |
| 1                                                                           | 4.561932000  | 0.876532000  | 1.029834000  | 1                                                                           | 3.227072000  | -4.395078000 | 0.530360000  |
| 6                                                                           | 5.496069000  | 2.979322000  | 0.014610000  | 6                                                                           | 5.684683000  | -4.546863000 | 0.000566000  |
| 8                                                                           | 4.513604000  | 2.713138000  | 0.733704000  | 8                                                                           | 4.925757000  | -3.638517000 | 0.389791000  |
| 8                                                                           | 5.834181000  | 4.052853000  | -0.494982000 | 8                                                                           | 6.889983000  | -4.507016000 | -0.271179000 |



|                                       |              |              |              |                                       |               |              |              |
|---------------------------------------|--------------|--------------|--------------|---------------------------------------|---------------|--------------|--------------|
| 7                                     | -5.190857000 | -0.152451000 | 0.693850000  | 7                                     | 8.001020000   | -1.968255000 | -0.269979000 |
| 1                                     | -4.995183000 | 0.855590000  | 0.793582000  | 1                                     | 7.610877000   | -2.928862000 | -0.243580000 |
| 1                                     | -4.562409000 | -0.876606000 | 1.030580000  | 1                                     | 8.923958000   | -1.832628000 | -0.645188000 |
| 6                                     | -6.199643000 | -0.562427000 | -0.042071000 | 6                                     | 7.228558000   | -0.911052000 | -0.015027000 |
| 7                                     | -6.389785000 | -1.882702000 | -0.292349000 | 7                                     | 7.761395000   | 0.330131000  | -0.150067000 |
| 1                                     | -7.172930000 | -2.151518000 | -0.869282000 | 1                                     | 8.722339000   | 0.409076000  | -0.447641000 |
| 7                                     | -7.073710000 | 0.315610000  | -0.540501000 | 7                                     | 5.982851000   | -1.074022000 | 0.371585000  |
| 1                                     | -6.892741000 | 1.332641000  | -0.468377000 | 1                                     | 5.572210000   | -2.019019000 | 0.422511000  |
| 1                                     | -7.767512000 | 0.003080000  | -1.198184000 | 1                                     | 5.455533000   | -0.224560000 | 0.551594000  |
| 6                                     | -5.496040000 | -2.979374000 | 0.014824000  | 6                                     | 7.101212000   | 1.605701000  | 0.015625000  |
| 8                                     | -4.513866000 | -2.713197000 | 0.734315000  | 8                                     | 5.916239000   | 1.576739000  | 0.399731000  |
| 8                                     | -5.833963000 | -4.052908000 | -0.494891000 | 8                                     | 7.820659000   | 2.574022000  | -0.254423000 |
| 7                                     | -3.810348000 | -5.967268000 | -0.540390000 | 7                                     | -5.851395000  | -1.625049000 | 0.360344000  |
| 1                                     | -4.600717000 | -5.302205000 | -0.467534000 | 1                                     | -5.891964000  | -0.595546000 | 0.413195000  |
| 1                                     | -3.886938000 | -6.724281000 | -1.198156000 | 1                                     | -5.006397000  | -2.161465000 | 0.534741000  |
| 6                                     | -2.612520000 | -5.649013000 | -0.043077000 | 6                                     | -6.906275000  | -2.313049000 | -0.015939000 |
| 7                                     | -1.564277000 | -6.473637000 | -0.294267000 | 7                                     | -6.848388000  | -3.662546000 | -0.151091000 |
| 1                                     | -1.723540000 | -7.286387000 | -0.870898000 | 1                                     | -7.682669000  | -4.151364000 | -0.439593000 |
| 7                                     | -2.462732000 | -4.570277000 | 0.692574000  | 7                                     | -8.063593000  | -1.696418000 | -0.260596000 |
| 1                                     | -3.237937000 | -3.896950000 | 0.793008000  | 1                                     | -8.128919000  | -0.661728000 | -0.234299000 |
| 1                                     | -1.521161000 | -4.387977000 | 1.028630000  | 1                                     | -8.839136000  | -2.219445000 | -0.629330000 |
| 6                                     | -0.167477000 | -6.247978000 | 0.012033000  | 6                                     | -5.699614000  | -4.525387000 | 0.010301000  |
| 8                                     | 0.093530000  | -5.264138000 | 0.731155000  | 8                                     | -4.641742000  | -3.984088000 | 0.385405000  |
| 8                                     | 0.592928000  | -7.077505000 | -0.497988000 | 8                                     | -5.929767000  | -5.710835000 | -0.253763000 |
|                                       |              |              |              | 7                                     | -3.700768000  | -7.359392000 | -0.249680000 |
|                                       |              |              |              | 1                                     | -4.550219000  | -6.765055000 | -0.225702000 |
|                                       |              |              |              | 1                                     | -3.777834000  | -8.297431000 | -0.603376000 |
|                                       |              |              |              | 6                                     | -2.495952000  | -6.837194000 | -0.015009000 |
|                                       |              |              |              | 7                                     | -1.405530000  | -7.634863000 | -0.147282000 |
|                                       |              |              |              | 1                                     | -1.544822000  | -8.593852000 | -0.428536000 |
|                                       |              |              |              | 7                                     | -2.374251000  | -5.579903000 | 0.348467000  |
|                                       |              |              |              | 1                                     | -3.204599000  | -4.970006000 | 0.402922000  |
|                                       |              |              |              | 1                                     | -1.427131000  | -5.251866000 | 0.514182000  |
|                                       |              |              |              | 6                                     | -0.013832000  | -7.273336000 | 0.003940000  |
|                                       |              |              |              | 8                                     | 0.224447000   | -6.105250000 | 0.366587000  |
|                                       |              |              |              | 8                                     | 0.768033000   | -8.195044000 | -0.255345000 |
| <b>(G-CO<sub>2</sub>)<sub>8</sub></b> |              |              |              | <b>(G-CO<sub>2</sub>)<sub>9</sub></b> |               |              |              |
| <b>SCF E = -3151.80828765 a.u.</b>    |              |              |              | <b>SCF E = -3545.78206152 a.u.</b>    |               |              |              |
| 7                                     | -4.148454000 | -5.653200000 | 0.357075000  | 7                                     | -7.313304000  | 2.118324000  | -1.141561000 |
| 1                                     | -3.196464000 | -6.045190000 | 0.359624000  | 1                                     | -6.865525000  | 2.985740000  | -0.815984000 |
| 1                                     | -4.346024000 | -4.668797000 | 0.203694000  | 1                                     | -6.876242000  | 1.204146000  | -1.072732000 |
| 6                                     | -5.189558000 | -6.432734000 | 0.560944000  | 6                                     | -8.482291000  | 2.164178000  | -1.745448000 |
| 7                                     | -6.449419000 | -5.929937000 | 0.557264000  | 7                                     | -9.059465000  | 1.040419000  | -2.237282000 |
| 1                                     | -7.216023000 | -6.565070000 | 0.721927000  | 1                                     | -9.963799000  | 1.124101000  | -2.676992000 |
| 7                                     | -5.027567000 | -7.735071000 | 0.785612000  | 7                                     | -9.118874000  | 3.324910000  | -1.899729000 |
| 1                                     | -4.086408000 | -8.176178000 | 0.718034000  | 1                                     | -8.798857000  | 4.167035000  | -1.376163000 |
| 1                                     | -5.834926000 | -8.327710000 | 0.875186000  | 1                                     | -10.048918000 | 3.325411000  | -2.283084000 |
| 6                                     | -6.873811000 | -4.566015000 | 0.346969000  | 6                                     | -8.581255000  | -0.320741000 | -2.173038000 |
| 8                                     | -5.985105000 | -3.718724000 | 0.145503000  | 8                                     | -7.476336000  | -0.511208000 | -1.634538000 |
| 8                                     | -8.103755000 | -4.429592000 | 0.397806000  | 8                                     | -9.370636000  | -1.131995000 | -2.676296000 |
| 7                                     | -6.939586000 | -1.072132000 | -0.086521000 | 7                                     | -6.834981000  | -3.243932000 | -1.257244000 |

|   |               |              |              |   |              |              |              |
|---|---------------|--------------|--------------|---|--------------|--------------|--------------|
| 1 | -6.545950000  | -2.019306000 | 0.000767000  | 1 | -7.005323000 | -2.240691000 | -1.409568000 |
| 1 | -6.368779000  | -0.234556000 | -0.149980000 | 1 | -6.023310000 | -3.602028000 | -0.762713000 |
| 6 | -8.241738000  | -0.899552000 | -0.174354000 | 6 | -7.726957000 | -4.134715000 | -1.638194000 |
| 7 | -8.773336000  | 0.339663000  | -0.321277000 | 7 | -7.548892000 | -5.454583000 | -1.381221000 |
| 1 | -9.776568000  | 0.421953000  | -0.391354000 | 1 | -8.269187000 | -6.097230000 | -1.675102000 |
| 7 | -9.068425000  | -1.942187000 | -0.127071000 | 7 | -8.823068000 | -3.760246000 | -2.293531000 |
| 1 | -8.709689000  | -2.900678000 | 0.067239000  | 1 | -9.025736000 | -2.753735000 | -2.472363000 |
| 1 | -10.062122000 | -1.788652000 | -0.137571000 | 1 | -9.518113000 | -4.446398000 | -2.532557000 |
| 6 | -8.088592000  | 1.606412000  | -0.428628000 | 6 | -6.478621000 | -6.093704000 | -0.653034000 |
| 8 | -8.862282000  | 2.563008000  | -0.571148000 | 8 | -6.652072000 | -7.312109000 | -0.510886000 |
| 8 | -6.846162000  | 1.588418000  | -0.366419000 | 8 | -5.540230000 | -5.372836000 | -0.269008000 |
| 7 | -5.652606000  | 4.146888000  | -0.366963000 | 7 | -3.360330000 | -6.881615000 | 0.724684000  |
| 1 | -6.044666000  | 3.195113000  | -0.368605000 | 1 | -4.111853000 | -6.289644000 | 0.345555000  |
| 1 | -4.668186000  | 4.344469000  | -0.213705000 | 1 | -2.399938000 | -6.567834000 | 0.827628000  |
| 6 | -6.432820000  | 5.188191000  | -0.567303000 | 6 | -3.638408000 | -8.079416000 | 1.195077000  |
| 7 | -5.930316000  | 6.448159000  | -0.559900000 | 7 | -2.680280000 | -8.842544000 | 1.775815000  |
| 1 | -6.564991000  | 7.215040000  | -0.725147000 | 1 | -2.941521000 | -9.755653000 | 2.116666000  |
| 7 | -7.734923000  | 5.026628000  | -0.792993000 | 7 | -4.878380000 | -8.562819000 | 1.122525000  |
| 1 | -8.175812000  | 4.085251000  | -0.724795000 | 1 | -5.586239000 | -8.088874000 | 0.522712000  |
| 1 | -8.327934000  | 5.834844000  | -0.871391000 | 1 | -5.051090000 | -9.511878000 | 1.407731000  |
| 6 | -4.566650000  | 6.872282000  | -0.347441000 | 6 | -1.280513000 | -8.542303000 | 1.965559000  |
| 8 | -3.719122000  | 5.983315000  | -0.148269000 | 8 | -0.874279000 | -7.439793000 | 1.557373000  |
| 8 | -4.430532000  | 8.102390000  | -0.394306000 | 8 | -0.662542000 | -9.460872000 | 2.521232000  |
| 7 | 9.067240000   | 1.944733000  | -0.141817000 | 7 | 9.388069000  | 0.202663000  | -2.808440000 |
| 1 | 8.708941000   | 2.902673000  | 0.055612000  | 1 | 9.362280000  | -0.811520000 | -2.572210000 |
| 1 | 10.060995000  | 1.792116000  | -0.158609000 | 1 | 10.221561000 | 0.574105000  | -3.231714000 |
| 6 | 8.241288000   | 0.901186000  | -0.181698000 | 6 | 8.511036000  | 1.040751000  | -2.256863000 |
| 7 | 8.773208000   | -0.337674000 | -0.330461000 | 7 | 8.707216000  | 2.373778000  | -2.409995000 |
| 1 | 9.776074000   | -0.418987000 | -0.406662000 | 1 | 9.534775000  | 2.678691000  | -2.900274000 |
| 7 | 6.939614000   | 1.072735000  | -0.085145000 | 7 | 7.471466000  | 0.580505000  | -1.593234000 |
| 1 | 6.545700000   | 2.019851000  | 0.002309000  | 1 | 7.330258000  | -0.433281000 | -1.485582000 |
| 1 | 6.369157000   | 0.234525000  | -0.143009000 | 1 | 6.838449000  | 1.275185000  | -1.208070000 |
| 6 | 8.089371000   | -1.605546000 | -0.430194000 | 6 | 7.932806000  | 3.465094000  | -1.866901000 |
| 8 | 6.847353000   | -1.588906000 | -0.359193000 | 8 | 6.896473000  | 3.172659000  | -1.243800000 |
| 8 | 8.863581000   | -2.561239000 | -0.575923000 | 8 | 8.429357000  | 4.574755000  | -2.104224000 |
| 7 | 7.738420000   | -5.028123000 | -0.771869000 | 7 | 7.365046000  | 6.636109000  | -0.688816000 |
| 1 | 8.178308000   | -4.085712000 | -0.712712000 | 1 | 7.786777000  | 5.855949000  | -1.235240000 |
| 1 | 8.331274000   | -5.836257000 | -0.852077000 | 1 | 7.837050000  | 7.523998000  | -0.671712000 |
| 6 | 6.434706000   | -5.188863000 | -0.555544000 | 6 | 6.108842000  | 6.555100000  | -0.253363000 |
| 7 | 5.932135000   | -6.448829000 | -0.548539000 | 7 | 5.543707000  | 7.658415000  | 0.296154000  |
| 1 | 6.568025000   | -7.216127000 | -0.707030000 | 1 | 6.103463000  | 8.495149000  | 0.365109000  |
| 7 | 5.653255000   | -4.147038000 | -0.362882000 | 7 | 5.439861000  | 5.424996000  | -0.347591000 |
| 1 | 6.045462000   | -3.195279000 | -0.363321000 | 1 | 5.908244000  | 4.577285000  | -0.695500000 |
| 1 | 4.668099000   | -4.344367000 | -0.214123000 | 1 | 4.494173000  | 5.428620000  | 0.022877000  |
| 6 | 4.567586000   | -6.872846000 | -0.341508000 | 6 | 4.228418000  | 7.803016000  | 0.874142000  |
| 8 | 3.718735000   | -5.983765000 | -0.148515000 | 8 | 3.471572000  | 6.817048000  | 0.820898000  |
| 8 | 4.432154000   | -8.103122000 | -0.386067000 | 8 | 4.032329000  | 8.928937000  | 1.351763000  |
| 7 | -1.072868000  | 6.937512000  | 0.088692000  | 7 | 1.948512000  | -7.235823000 | 1.514410000  |
| 1 | -2.019929000  | 6.543909000  | -0.000057000 | 1 | 0.919843000  | -7.250696000 | 1.539405000  |
| 1 | -0.235141000  | 6.366803000  | 0.150703000  | 1 | 2.483452000  | -6.514908000 | 1.039144000  |
| 6 | -0.900550000  | 8.239593000  | 0.178730000  | 6 | 2.642706000  | -8.200078000 | 2.081712000  |
| 7 | 0.338513000   | 8.771203000  | 0.326857000  | 7 | 3.997785000  | -8.209652000 | 2.026500000  |
| 1 | 0.420859000   | 9.774414000  | 0.397229000  | 1 | 4.485195000  | -8.982327000 | 2.454990000  |

|                                        |              |               |              |   |              |              |              |
|----------------------------------------|--------------|---------------|--------------|---|--------------|--------------|--------------|
| 7                                      | -1.943314000 | 9.066148000   | 0.132682000  | 7 | 2.028509000  | -9.183570000 | 2.736858000  |
| 1                                      | -2.901742000 | 8.707686000   | -0.062469000 | 1 | 0.991734000  | -9.279848000 | 2.697911000  |
| 1                                      | -1.789883000 | 10.059831000  | 0.145270000  | 1 | 2.570399000  | -9.953414000 | 3.090754000  |
| 6                                      | 1.605752000  | 8.086838000   | 0.431996000  | 6 | 4.877091000  | -7.290656000 | 1.343051000  |
| 8                                      | 1.588393000  | 6.844439000   | 0.367710000  | 8 | 4.354793000  | -6.303432000 | 0.794972000  |
| 8                                      | 2.561969000  | 8.860902000   | 0.574929000  | 8 | 6.067626000  | -7.627996000 | 1.400971000  |
| 7                                      | 5.027180000  | 7.734825000   | 0.789792000  | 7 | 7.746526000  | -6.227491000 | -0.212706000 |
| 1                                      | 4.085595000  | 8.175529000   | 0.724782000  | 1 | 7.111640000  | -6.788152000 | 0.393737000  |
| 1                                      | 5.835162000  | 8.326769000   | 0.878524000  | 1 | 8.685506000  | -6.557058000 | -0.359086000 |
| 6                                      | 5.188713000  | 6.432504000   | 0.564415000  | 6 | 7.449776000  | -4.960613000 | -0.500363000 |
| 7                                      | 6.448662000  | 5.929922000   | 0.558360000  | 7 | 8.395353000  | -4.195645000 | -1.099348000 |
| 1                                      | 7.215439000  | 6.565268000   | 0.721447000  | 1 | 9.289327000  | -4.617037000 | -1.302868000 |
| 7                                      | 4.147418000  | 5.652809000   | 0.362193000  | 7 | 6.259683000  | -4.472891000 | -0.219044000 |
| 1                                      | 3.195444000  | 6.044668000   | 0.365640000  | 1 | 5.530376000  | -5.086674000 | 0.168746000  |
| 1                                      | 4.344969000  | 4.668549000   | 0.207832000  | 1 | 6.094670000  | -3.505926000 | -0.482371000 |
| 6                                      | 6.873147000  | 4.566454000   | 0.345350000  | 6 | 8.305460000  | -2.816951000 | -1.519159000 |
| 8                                      | 5.984388000  | 3.718830000   | 0.145481000  | 8 | 7.237760000  | -2.220877000 | -1.290340000 |
| 8                                      | 8.103251000  | 4.430622000   | 0.392563000  | 8 | 9.342607000  | -2.408877000 | -2.059519000 |
| 7                                      | 1.942462000  | -9.066760000  | 0.128749000  | 7 | -5.299705000 | 8.234771000  | 1.532855000  |
| 1                                      | 2.901646000  | -8.708054000  | -0.062239000 | 1 | -4.386618000 | 8.525090000  | 1.942400000  |
| 1                                      | 1.789023000  | -10.060453000 | 0.139923000  | 1 | -6.106165000 | 8.816301000  | 1.683097000  |
| 6                                      | 0.899723000  | -8.240199000  | 0.174262000  | 6 | -5.450112000 | 7.033922000  | 0.978356000  |
| 7                                      | -0.339617000 | -8.771946000  | 0.319784000  | 7 | -6.687734000 | 6.665817000  | 0.563373000  |
| 1                                      | -0.422012000 | -9.775177000  | 0.389778000  | 1 | -7.440956000 | 7.328839000  | 0.669503000  |
| 7                                      | 1.072267000  | -6.938001000  | 0.086120000  | 7 | -4.418336000 | 6.228906000  | 0.832188000  |
| 1                                      | 2.019414000  | -6.544418000  | -0.001866000 | 1 | -3.474822000 | 6.546376000  | 1.092619000  |
| 1                                      | 0.234475000  | -6.367323000  | 0.147514000  | 1 | -4.602875000 | 5.336373000  | 0.383899000  |
| 6                                      | -1.606907000 | -8.087662000  | 0.424314000  | 6 | -7.086435000 | 5.455556000  | -0.115476000 |
| 8                                      | -1.589437000 | -6.845163000  | 0.361114000  | 8 | -6.215462000 | 4.583617000  | -0.284951000 |
| 8                                      | -2.563231000 | -8.861849000  | 0.565686000  | 8 | -8.282014000 | 5.456220000  | -0.439973000 |
|                                        |              |               |              | 7 | 1.617512000  | 9.332165000  | 2.532004000  |
|                                        |              |               |              | 1 | 2.563557000  | 9.173182000  | 2.126108000  |
|                                        |              |               |              | 1 | 1.434484000  | 10.211025000 | 2.985928000  |
|                                        |              |               |              | 6 | 0.590004000  | 8.579769000  | 2.138549000  |
|                                        |              |               |              | 7 | -0.662507000 | 8.961477000  | 2.490377000  |
|                                        |              |               |              | 1 | -0.769680000 | 9.823829000  | 3.003295000  |
|                                        |              |               |              | 7 | 0.793589000  | 7.483809000  | 1.438332000  |
|                                        |              |               |              | 1 | 1.751358000  | 7.188823000  | 1.204015000  |
|                                        |              |               |              | 1 | -0.032688000 | 6.951450000  | 1.182640000  |
|                                        |              |               |              | 6 | -1.921782000 | 8.342120000  | 2.148959000  |
|                                        |              |               |              | 8 | -1.877023000 | 7.278961000  | 1.504710000  |
|                                        |              |               |              | 8 | -2.900242000 | 8.983090000  | 2.556576000  |
| <b>(G-CO<sub>2</sub>)<sub>10</sub></b> |              |               |              |   |              |              |              |
| <b>SCF E = -3939.74930800 a.u.</b>     |              |               |              |   |              |              |              |
| 7                                      | 8.444617000  | -0.737202000  | 0.767401000  |   |              |              |              |
| 1                                      | 8.212740000  | 0.156160000   | 1.223429000  |   |              |              |              |
| 1                                      | 7.768147000  | -1.291815000  | 0.250850000  |   |              |              |              |
| 6                                      | 9.695693000  | -1.141965000  | 0.709017000  |   |              |              |              |
| 7                                      | 10.041148000 | -2.249299000  | 0.006373000  |   |              |              |              |
| 1                                      | 11.017339000 | -2.501406000  | -0.035838000 |   |              |              |              |
| 7                                      | 10.655340000 | -0.459721000  | 1.333887000  |   |              |              |              |

|   |              |              |              |
|---|--------------|--------------|--------------|
| 1 | 10.406494000 | 0.301435000  | 1.997458000  |
| 1 | 11.593032000 | -0.823060000 | 1.344186000  |
| 6 | 9.192944000  | -3.103593000 | -0.792574000 |
| 8 | 7.971801000  | -2.861846000 | -0.775542000 |
| 8 | 9.816633000  | -3.986631000 | -1.394863000 |
| 7 | 6.455454000  | -4.971760000 | -1.830147000 |
| 1 | 6.972716000  | -4.190328000 | -1.402965000 |
| 1 | 5.478352000  | -5.169752000 | -1.634351000 |
| 6 | 7.016558000  | -5.692316000 | -2.777214000 |
| 7 | 6.316322000  | -6.647445000 | -3.437147000 |
| 1 | 6.780544000  | -7.156487000 | -4.174474000 |
| 7 | 8.289873000  | -5.483537000 | -3.117565000 |
| 1 | 8.895229000  | -4.901089000 | -2.506439000 |
| 1 | 8.730145000  | -6.104800000 | -3.774798000 |
| 6 | 4.930300000  | -7.020836000 | -3.264055000 |
| 8 | 4.554420000  | -7.890294000 | -4.059650000 |
| 8 | 4.301197000  | -6.445457000 | -2.356639000 |
| 7 | 1.899861000  | -7.736405000 | -1.699269000 |
| 1 | 2.786172000  | -7.246113000 | -1.882272000 |
| 1 | 1.393039000  | -7.674395000 | -0.819886000 |
| 6 | 1.298049000  | -8.389278000 | -2.670618000 |
| 7 | 0.076833000  | -8.944042000 | -2.481863000 |
| 1 | -0.356375000 | -9.427060000 | -3.254591000 |
| 7 | 1.877118000  | -8.502618000 | -3.868058000 |
| 1 | 2.878142000  | -8.253321000 | -3.983732000 |
| 1 | 1.445290000  | -9.081202000 | -4.568382000 |
| 6 | -0.733599000 | -8.918322000 | -1.278378000 |
| 8 | -0.263911000 | -8.377525000 | -0.276952000 |
| 8 | -1.837360000 | -9.485269000 | -1.435353000 |
| 7 | -8.355366000 | 5.534830000  | -2.933373000 |
| 1 | -8.915356000 | 4.941582000  | -2.286669000 |
| 1 | -8.840728000 | 6.224329000  | -3.482288000 |
| 6 | -7.046881000 | 5.684220000  | -2.721887000 |
| 7 | -6.395166000 | 6.677539000  | -3.373624000 |
| 1 | -6.933602000 | 7.287453000  | -3.970574000 |
| 7 | -6.406041000 | 4.870164000  | -1.909743000 |
| 1 | -6.904370000 | 4.081096000  | -1.476814000 |
| 1 | -5.408875000 | 5.030553000  | -1.802827000 |
| 6 | -5.004687000 | 7.058726000  | -3.276995000 |
| 8 | -4.275620000 | 6.373637000  | -2.538493000 |
| 8 | -4.731952000 | 8.054064000  | -3.962216000 |
| 7 | -2.322791000 | 9.206845000  | -3.512644000 |
| 1 | -3.231498000 | 8.741382000  | -3.723117000 |
| 1 | -2.151058000 | 10.123162000 | -3.889687000 |
| 6 | -1.485450000 | 8.703371000  | -2.608879000 |
| 7 | -0.368198000 | 9.408273000  | -2.302915000 |
| 1 | -0.242870000 | 10.309859000 | -2.738491000 |
| 7 | -1.733172000 | 7.543493000  | -2.035676000 |
| 1 | -2.614619000 | 7.049613000  | -2.226623000 |
| 1 | -1.048957000 | 7.219302000  | -1.358524000 |
| 6 | 0.639764000  | 9.112268000  | -1.311714000 |
| 8 | 0.573503000  | 8.009455000  | -0.740766000 |
| 8 | 1.458083000  | 10.031676000 | -1.168027000 |

|   |               |               |              |
|---|---------------|---------------|--------------|
| 7 | -3.857953000  | -8.212803000  | 0.077866000  |
| 1 | -3.304880000  | -8.496279000  | -0.732331000 |
| 1 | -4.508807000  | -7.433499000  | 0.097823000  |
| 6 | -3.559460000  | -8.771467000  | 1.231085000  |
| 7 | -4.133270000  | -8.366445000  | 2.383950000  |
| 1 | -3.948749000  | -8.900943000  | 3.220292000  |
| 7 | -2.706509000  | -9.805411000  | 1.263560000  |
| 1 | -2.182674000  | -9.953843000  | 0.397575000  |
| 1 | -2.231197000  | -10.002781000 | 2.129314000  |
| 6 | -5.094548000  | -7.299972000  | 2.572570000  |
| 8 | -5.384186000  | -6.622804000  | 1.569272000  |
| 8 | -5.501995000  | -7.210948000  | 3.736178000  |
| 7 | -10.512634000 | 0.516819000   | 1.607999000  |
| 1 | -10.234090000 | -0.263342000  | 2.236520000  |
| 1 | -11.398926000 | 0.965291000   | 1.766725000  |
| 6 | -9.592496000  | 1.138053000   | 0.869286000  |
| 7 | -9.931648000  | 2.295777000   | 0.251225000  |
| 1 | -10.877409000 | 2.632034000   | 0.355251000  |
| 7 | -8.387680000  | 0.624857000   | 0.736649000  |
| 1 | -8.187250000  | -0.308531000  | 1.121270000  |
| 1 | -7.741206000  | 1.138552000   | 0.145105000  |
| 6 | -9.129614000  | 3.108301000   | -0.634227000 |
| 8 | -7.941280000  | 2.774419000   | -0.791799000 |
| 8 | -9.756384000  | 4.058922000   | -1.120682000 |
| 7 | 7.740632000   | 5.366551000   | 4.082828000  |
| 1 | 7.112145000   | 6.167068000   | 3.862349000  |
| 1 | 8.551273000   | 5.538122000   | 4.653223000  |
| 6 | 7.692865000   | 4.260992000   | 3.339917000  |
| 7 | 8.671188000   | 3.334990000   | 3.495673000  |
| 1 | 9.424554000   | 3.543618000   | 4.133798000  |
| 7 | 6.707354000   | 4.069366000   | 2.488167000  |
| 1 | 5.975064000   | 4.781789000   | 2.366956000  |
| 1 | 6.728873000   | 3.200577000   | 1.962092000  |
| 6 | 8.866791000   | 2.103385000   | 2.766094000  |
| 8 | 7.978287000   | 1.775294000   | 1.959140000  |
| 8 | 9.926467000   | 1.531528000   | 3.054668000  |
| 7 | 3.073547000   | 9.783021000   | 0.998233000  |
| 1 | 2.429756000   | 9.914639000   | 0.189644000  |
| 1 | 3.594107000   | 10.579190000  | 1.325989000  |
| 6 | 3.520558000   | 8.559484000   | 1.283847000  |
| 7 | 4.572730000   | 8.436081000   | 2.128555000  |
| 1 | 4.984286000   | 9.278893000   | 2.500774000  |
| 7 | 2.934996000   | 7.499617000   | 0.766248000  |
| 1 | 2.085235000   | 7.610682000   | 0.197926000  |
| 1 | 3.315956000   | 6.596657000   | 1.032694000  |
| 6 | 5.238312000   | 7.232802000   | 2.571646000  |
| 8 | 4.812786000   | 6.151151000   | 2.129735000  |
| 8 | 6.176760000   | 7.461200000   | 3.347370000  |
| 7 | -6.843196000  | -4.301018000  | 2.198418000  |
| 1 | -6.952295000  | -3.477894000  | 1.613115000  |
| 6 | -7.607176000  | -4.360486000  | 3.268459000  |
| 7 | -8.473661000  | -3.360849000  | 3.565163000  |
| 1 | -9.066167000  | -3.468454000  | 4.374973000  |

|   |              |              |             |
|---|--------------|--------------|-------------|
| 7 | -7.551362000 | -5.417259000 | 4.079620000 |
| 1 | -6.794148000 | -6.119345000 | 3.969052000 |
| 1 | -8.081718000 | -5.412251000 | 4.934166000 |
| 6 | -8.763527000 | -2.171311000 | 2.797183000 |
| 8 | -8.061367000 | -1.962684000 | 1.790640000 |
| 8 | -9.694408000 | -1.503210000 | 3.264755000 |
| 1 | -6.267523000 | -5.111672000 | 1.933005000 |

**Cartesian coordinates structures of  $G(\text{CO}_2)_n$  complexes.**

|                                                                                                                                                                                                                                                                                                                                                                                                                                                                                                                                                                                                                                                                                                                                                                                                                                                                                                                                                                                                                                                                                                                                                                                                                                                                                                                 |              |              |              |              |   |              |              |              |   |              |              |              |   |              |              |              |   |             |              |              |   |              |              |              |   |              |              |              |   |              |              |             |   |              |              |              |   |              |             |             |   |              |             |             |   |              |              |              |                                                                                                                                                                                                                                                                                                                                                                                                                                                                                                                                                                                                                                                                                                                                                                                                                                                                                                                                                                                                                                                                                                                                                                                                                                                                                                                                                                                               |              |             |              |              |              |             |              |                                                                                                                                                                                                                                                                                                                                                                                                                                                                                                                                                                                                                                                                                                                                                                                                                                                                                                                                                                                                                                                                                                                                                                                                                           |   |             |              |              |   |             |              |              |   |              |              |              |   |             |              |              |   |             |              |              |   |              |              |              |   |             |              |             |   |              |              |              |   |              |              |             |   |              |              |              |   |             |             |             |   |             |             |              |   |              |              |              |
|-----------------------------------------------------------------------------------------------------------------------------------------------------------------------------------------------------------------------------------------------------------------------------------------------------------------------------------------------------------------------------------------------------------------------------------------------------------------------------------------------------------------------------------------------------------------------------------------------------------------------------------------------------------------------------------------------------------------------------------------------------------------------------------------------------------------------------------------------------------------------------------------------------------------------------------------------------------------------------------------------------------------------------------------------------------------------------------------------------------------------------------------------------------------------------------------------------------------------------------------------------------------------------------------------------------------|--------------|--------------|--------------|--------------|---|--------------|--------------|--------------|---|--------------|--------------|--------------|---|--------------|--------------|--------------|---|-------------|--------------|--------------|---|--------------|--------------|--------------|---|--------------|--------------|--------------|---|--------------|--------------|-------------|---|--------------|--------------|--------------|---|--------------|-------------|-------------|---|--------------|-------------|-------------|---|--------------|--------------|--------------|-----------------------------------------------------------------------------------------------------------------------------------------------------------------------------------------------------------------------------------------------------------------------------------------------------------------------------------------------------------------------------------------------------------------------------------------------------------------------------------------------------------------------------------------------------------------------------------------------------------------------------------------------------------------------------------------------------------------------------------------------------------------------------------------------------------------------------------------------------------------------------------------------------------------------------------------------------------------------------------------------------------------------------------------------------------------------------------------------------------------------------------------------------------------------------------------------------------------------------------------------------------------------------------------------------------------------------------------------------------------------------------------------|--------------|-------------|--------------|--------------|--------------|-------------|--------------|---------------------------------------------------------------------------------------------------------------------------------------------------------------------------------------------------------------------------------------------------------------------------------------------------------------------------------------------------------------------------------------------------------------------------------------------------------------------------------------------------------------------------------------------------------------------------------------------------------------------------------------------------------------------------------------------------------------------------------------------------------------------------------------------------------------------------------------------------------------------------------------------------------------------------------------------------------------------------------------------------------------------------------------------------------------------------------------------------------------------------------------------------------------------------------------------------------------------------|---|-------------|--------------|--------------|---|-------------|--------------|--------------|---|--------------|--------------|--------------|---|-------------|--------------|--------------|---|-------------|--------------|--------------|---|--------------|--------------|--------------|---|-------------|--------------|-------------|---|--------------|--------------|--------------|---|--------------|--------------|-------------|---|--------------|--------------|--------------|---|-------------|-------------|-------------|---|-------------|-------------|--------------|---|--------------|--------------|--------------|
| <p><b><math>G(\text{CO}_2)</math></b><br/> <b>SCF E = -393.937166624 a.u.</b></p> <table> <tbody> <tr><td>7</td><td>2.715356000</td><td>-0.558597000</td><td>0.167860000</td></tr> <tr><td>1</td><td>3.426056000</td><td>-0.020952000</td><td>-0.307762000</td></tr> <tr><td>1</td><td>2.845915000</td><td>-1.554107000</td><td>0.073324000</td></tr> <tr><td>6</td><td>1.411936000</td><td>-0.113930000</td><td>-0.028680000</td></tr> <tr><td>7</td><td>0.359959000</td><td>-0.835501000</td><td>-0.099493000</td></tr> <tr><td>1</td><td>0.577996000</td><td>-1.827508000</td><td>-0.109878000</td></tr> <tr><td>7</td><td>1.328931000</td><td>1.261789000</td><td>-0.141416000</td></tr> <tr><td>1</td><td>1.954696000</td><td>1.781444000</td><td>0.456592000</td></tr> <tr><td>1</td><td>0.374361000</td><td>1.595582000</td><td>-0.119054000</td></tr> <tr><td>6</td><td>-2.171459000</td><td>0.059694000</td><td>0.029234000</td></tr> <tr><td>8</td><td>-1.809249000</td><td>1.160604000</td><td>0.063150000</td></tr> <tr><td>8</td><td>-2.622201000</td><td>-1.000964000</td><td>0.001200000</td></tr> </tbody> </table>                                                                                                                                                                             | 7            | 2.715356000  | -0.558597000 | 0.167860000  | 1 | 3.426056000  | -0.020952000 | -0.307762000 | 1 | 2.845915000  | -1.554107000 | 0.073324000  | 6 | 1.411936000  | -0.113930000 | -0.028680000 | 7 | 0.359959000 | -0.835501000 | -0.099493000 | 1 | 0.577996000  | -1.827508000 | -0.109878000 | 7 | 1.328931000  | 1.261789000  | -0.141416000 | 1 | 1.954696000  | 1.781444000  | 0.456592000 | 1 | 0.374361000  | 1.595582000  | -0.119054000 | 6 | -2.171459000 | 0.059694000 | 0.029234000 | 8 | -1.809249000 | 1.160604000 | 0.063150000 | 8 | -2.622201000 | -1.000964000 | 0.001200000  | <p><b><math>G(\text{CO}_2)_2</math></b><br/> <b>SCF E = -582.521554562 a.u.</b></p> <table> <tbody> <tr><td>7</td><td>2.617485000</td><td>-1.152526000</td><td>-0.416644000</td></tr> <tr><td>1</td><td>3.279350000</td><td>-0.657774000</td><td>0.165441000</td></tr> <tr><td>1</td><td>2.829795000</td><td>-1.062146000</td><td>-1.398903000</td></tr> <tr><td>6</td><td>1.285161000</td><td>-0.936225000</td><td>-0.093271000</td></tr> <tr><td>7</td><td>0.295601000</td><td>-0.882613000</td><td>-0.901470000</td></tr> <tr><td>1</td><td>0.594619000</td><td>-0.935196000</td><td>-1.870846000</td></tr> <tr><td>7</td><td>1.076885000</td><td>-0.744893000</td><td>1.262073000</td></tr> <tr><td>1</td><td>1.698852000</td><td>-1.254894000</td><td>1.872387000</td></tr> <tr><td>1</td><td>0.101064000</td><td>-0.825688000</td><td>1.521761000</td></tr> <tr><td>6</td><td>-2.298318000</td><td>-0.574372000</td><td>-0.078495000</td></tr> <tr><td>8</td><td>-2.024786000</td><td>-0.951436000</td><td>0.982978000</td></tr> <tr><td>8</td><td>-2.648280000</td><td>-0.198189000</td><td>-1.110186000</td></tr> <tr><td>6</td><td>0.319936000</td><td>1.916935000</td><td>0.095025000</td></tr> <tr><td>8</td><td>1.375484000</td><td>2.089383000</td><td>-0.343253000</td></tr> <tr><td>8</td><td>-0.736688000</td><td>1.779979000</td><td>0.540822000</td></tr> </tbody> </table> | 7            | 2.617485000 | -1.152526000 | -0.416644000 | 1            | 3.279350000 | -0.657774000 | 0.165441000                                                                                                                                                                                                                                                                                                                                                                                                                                                                                                                                                                                                                                                                                                                                                                                                                                                                                                                                                                                                                                                                                                                                                                                                               | 1 | 2.829795000 | -1.062146000 | -1.398903000 | 6 | 1.285161000 | -0.936225000 | -0.093271000 | 7 | 0.295601000  | -0.882613000 | -0.901470000 | 1 | 0.594619000 | -0.935196000 | -1.870846000 | 7 | 1.076885000 | -0.744893000 | 1.262073000  | 1 | 1.698852000  | -1.254894000 | 1.872387000  | 1 | 0.101064000 | -0.825688000 | 1.521761000 | 6 | -2.298318000 | -0.574372000 | -0.078495000 | 8 | -2.024786000 | -0.951436000 | 0.982978000 | 8 | -2.648280000 | -0.198189000 | -1.110186000 | 6 | 0.319936000 | 1.916935000 | 0.095025000 | 8 | 1.375484000 | 2.089383000 | -0.343253000 | 8 | -0.736688000 | 1.779979000  | 0.540822000  |
| 7                                                                                                                                                                                                                                                                                                                                                                                                                                                                                                                                                                                                                                                                                                                                                                                                                                                                                                                                                                                                                                                                                                                                                                                                                                                                                                               | 2.715356000  | -0.558597000 | 0.167860000  |              |   |              |              |              |   |              |              |              |   |              |              |              |   |             |              |              |   |              |              |              |   |              |              |              |   |              |              |             |   |              |              |              |   |              |             |             |   |              |             |             |   |              |              |              |                                                                                                                                                                                                                                                                                                                                                                                                                                                                                                                                                                                                                                                                                                                                                                                                                                                                                                                                                                                                                                                                                                                                                                                                                                                                                                                                                                                               |              |             |              |              |              |             |              |                                                                                                                                                                                                                                                                                                                                                                                                                                                                                                                                                                                                                                                                                                                                                                                                                                                                                                                                                                                                                                                                                                                                                                                                                           |   |             |              |              |   |             |              |              |   |              |              |              |   |             |              |              |   |             |              |              |   |              |              |              |   |             |              |             |   |              |              |              |   |              |              |             |   |              |              |              |   |             |             |             |   |             |             |              |   |              |              |              |
| 1                                                                                                                                                                                                                                                                                                                                                                                                                                                                                                                                                                                                                                                                                                                                                                                                                                                                                                                                                                                                                                                                                                                                                                                                                                                                                                               | 3.426056000  | -0.020952000 | -0.307762000 |              |   |              |              |              |   |              |              |              |   |              |              |              |   |             |              |              |   |              |              |              |   |              |              |              |   |              |              |             |   |              |              |              |   |              |             |             |   |              |             |             |   |              |              |              |                                                                                                                                                                                                                                                                                                                                                                                                                                                                                                                                                                                                                                                                                                                                                                                                                                                                                                                                                                                                                                                                                                                                                                                                                                                                                                                                                                                               |              |             |              |              |              |             |              |                                                                                                                                                                                                                                                                                                                                                                                                                                                                                                                                                                                                                                                                                                                                                                                                                                                                                                                                                                                                                                                                                                                                                                                                                           |   |             |              |              |   |             |              |              |   |              |              |              |   |             |              |              |   |             |              |              |   |              |              |              |   |             |              |             |   |              |              |              |   |              |              |             |   |              |              |              |   |             |             |             |   |             |             |              |   |              |              |              |
| 1                                                                                                                                                                                                                                                                                                                                                                                                                                                                                                                                                                                                                                                                                                                                                                                                                                                                                                                                                                                                                                                                                                                                                                                                                                                                                                               | 2.845915000  | -1.554107000 | 0.073324000  |              |   |              |              |              |   |              |              |              |   |              |              |              |   |             |              |              |   |              |              |              |   |              |              |              |   |              |              |             |   |              |              |              |   |              |             |             |   |              |             |             |   |              |              |              |                                                                                                                                                                                                                                                                                                                                                                                                                                                                                                                                                                                                                                                                                                                                                                                                                                                                                                                                                                                                                                                                                                                                                                                                                                                                                                                                                                                               |              |             |              |              |              |             |              |                                                                                                                                                                                                                                                                                                                                                                                                                                                                                                                                                                                                                                                                                                                                                                                                                                                                                                                                                                                                                                                                                                                                                                                                                           |   |             |              |              |   |             |              |              |   |              |              |              |   |             |              |              |   |             |              |              |   |              |              |              |   |             |              |             |   |              |              |              |   |              |              |             |   |              |              |              |   |             |             |             |   |             |             |              |   |              |              |              |
| 6                                                                                                                                                                                                                                                                                                                                                                                                                                                                                                                                                                                                                                                                                                                                                                                                                                                                                                                                                                                                                                                                                                                                                                                                                                                                                                               | 1.411936000  | -0.113930000 | -0.028680000 |              |   |              |              |              |   |              |              |              |   |              |              |              |   |             |              |              |   |              |              |              |   |              |              |              |   |              |              |             |   |              |              |              |   |              |             |             |   |              |             |             |   |              |              |              |                                                                                                                                                                                                                                                                                                                                                                                                                                                                                                                                                                                                                                                                                                                                                                                                                                                                                                                                                                                                                                                                                                                                                                                                                                                                                                                                                                                               |              |             |              |              |              |             |              |                                                                                                                                                                                                                                                                                                                                                                                                                                                                                                                                                                                                                                                                                                                                                                                                                                                                                                                                                                                                                                                                                                                                                                                                                           |   |             |              |              |   |             |              |              |   |              |              |              |   |             |              |              |   |             |              |              |   |              |              |              |   |             |              |             |   |              |              |              |   |              |              |             |   |              |              |              |   |             |             |             |   |             |             |              |   |              |              |              |
| 7                                                                                                                                                                                                                                                                                                                                                                                                                                                                                                                                                                                                                                                                                                                                                                                                                                                                                                                                                                                                                                                                                                                                                                                                                                                                                                               | 0.359959000  | -0.835501000 | -0.099493000 |              |   |              |              |              |   |              |              |              |   |              |              |              |   |             |              |              |   |              |              |              |   |              |              |              |   |              |              |             |   |              |              |              |   |              |             |             |   |              |             |             |   |              |              |              |                                                                                                                                                                                                                                                                                                                                                                                                                                                                                                                                                                                                                                                                                                                                                                                                                                                                                                                                                                                                                                                                                                                                                                                                                                                                                                                                                                                               |              |             |              |              |              |             |              |                                                                                                                                                                                                                                                                                                                                                                                                                                                                                                                                                                                                                                                                                                                                                                                                                                                                                                                                                                                                                                                                                                                                                                                                                           |   |             |              |              |   |             |              |              |   |              |              |              |   |             |              |              |   |             |              |              |   |              |              |              |   |             |              |             |   |              |              |              |   |              |              |             |   |              |              |              |   |             |             |             |   |             |             |              |   |              |              |              |
| 1                                                                                                                                                                                                                                                                                                                                                                                                                                                                                                                                                                                                                                                                                                                                                                                                                                                                                                                                                                                                                                                                                                                                                                                                                                                                                                               | 0.577996000  | -1.827508000 | -0.109878000 |              |   |              |              |              |   |              |              |              |   |              |              |              |   |             |              |              |   |              |              |              |   |              |              |              |   |              |              |             |   |              |              |              |   |              |             |             |   |              |             |             |   |              |              |              |                                                                                                                                                                                                                                                                                                                                                                                                                                                                                                                                                                                                                                                                                                                                                                                                                                                                                                                                                                                                                                                                                                                                                                                                                                                                                                                                                                                               |              |             |              |              |              |             |              |                                                                                                                                                                                                                                                                                                                                                                                                                                                                                                                                                                                                                                                                                                                                                                                                                                                                                                                                                                                                                                                                                                                                                                                                                           |   |             |              |              |   |             |              |              |   |              |              |              |   |             |              |              |   |             |              |              |   |              |              |              |   |             |              |             |   |              |              |              |   |              |              |             |   |              |              |              |   |             |             |             |   |             |             |              |   |              |              |              |
| 7                                                                                                                                                                                                                                                                                                                                                                                                                                                                                                                                                                                                                                                                                                                                                                                                                                                                                                                                                                                                                                                                                                                                                                                                                                                                                                               | 1.328931000  | 1.261789000  | -0.141416000 |              |   |              |              |              |   |              |              |              |   |              |              |              |   |             |              |              |   |              |              |              |   |              |              |              |   |              |              |             |   |              |              |              |   |              |             |             |   |              |             |             |   |              |              |              |                                                                                                                                                                                                                                                                                                                                                                                                                                                                                                                                                                                                                                                                                                                                                                                                                                                                                                                                                                                                                                                                                                                                                                                                                                                                                                                                                                                               |              |             |              |              |              |             |              |                                                                                                                                                                                                                                                                                                                                                                                                                                                                                                                                                                                                                                                                                                                                                                                                                                                                                                                                                                                                                                                                                                                                                                                                                           |   |             |              |              |   |             |              |              |   |              |              |              |   |             |              |              |   |             |              |              |   |              |              |              |   |             |              |             |   |              |              |              |   |              |              |             |   |              |              |              |   |             |             |             |   |             |             |              |   |              |              |              |
| 1                                                                                                                                                                                                                                                                                                                                                                                                                                                                                                                                                                                                                                                                                                                                                                                                                                                                                                                                                                                                                                                                                                                                                                                                                                                                                                               | 1.954696000  | 1.781444000  | 0.456592000  |              |   |              |              |              |   |              |              |              |   |              |              |              |   |             |              |              |   |              |              |              |   |              |              |              |   |              |              |             |   |              |              |              |   |              |             |             |   |              |             |             |   |              |              |              |                                                                                                                                                                                                                                                                                                                                                                                                                                                                                                                                                                                                                                                                                                                                                                                                                                                                                                                                                                                                                                                                                                                                                                                                                                                                                                                                                                                               |              |             |              |              |              |             |              |                                                                                                                                                                                                                                                                                                                                                                                                                                                                                                                                                                                                                                                                                                                                                                                                                                                                                                                                                                                                                                                                                                                                                                                                                           |   |             |              |              |   |             |              |              |   |              |              |              |   |             |              |              |   |             |              |              |   |              |              |              |   |             |              |             |   |              |              |              |   |              |              |             |   |              |              |              |   |             |             |             |   |             |             |              |   |              |              |              |
| 1                                                                                                                                                                                                                                                                                                                                                                                                                                                                                                                                                                                                                                                                                                                                                                                                                                                                                                                                                                                                                                                                                                                                                                                                                                                                                                               | 0.374361000  | 1.595582000  | -0.119054000 |              |   |              |              |              |   |              |              |              |   |              |              |              |   |             |              |              |   |              |              |              |   |              |              |              |   |              |              |             |   |              |              |              |   |              |             |             |   |              |             |             |   |              |              |              |                                                                                                                                                                                                                                                                                                                                                                                                                                                                                                                                                                                                                                                                                                                                                                                                                                                                                                                                                                                                                                                                                                                                                                                                                                                                                                                                                                                               |              |             |              |              |              |             |              |                                                                                                                                                                                                                                                                                                                                                                                                                                                                                                                                                                                                                                                                                                                                                                                                                                                                                                                                                                                                                                                                                                                                                                                                                           |   |             |              |              |   |             |              |              |   |              |              |              |   |             |              |              |   |             |              |              |   |              |              |              |   |             |              |             |   |              |              |              |   |              |              |             |   |              |              |              |   |             |             |             |   |             |             |              |   |              |              |              |
| 6                                                                                                                                                                                                                                                                                                                                                                                                                                                                                                                                                                                                                                                                                                                                                                                                                                                                                                                                                                                                                                                                                                                                                                                                                                                                                                               | -2.171459000 | 0.059694000  | 0.029234000  |              |   |              |              |              |   |              |              |              |   |              |              |              |   |             |              |              |   |              |              |              |   |              |              |              |   |              |              |             |   |              |              |              |   |              |             |             |   |              |             |             |   |              |              |              |                                                                                                                                                                                                                                                                                                                                                                                                                                                                                                                                                                                                                                                                                                                                                                                                                                                                                                                                                                                                                                                                                                                                                                                                                                                                                                                                                                                               |              |             |              |              |              |             |              |                                                                                                                                                                                                                                                                                                                                                                                                                                                                                                                                                                                                                                                                                                                                                                                                                                                                                                                                                                                                                                                                                                                                                                                                                           |   |             |              |              |   |             |              |              |   |              |              |              |   |             |              |              |   |             |              |              |   |              |              |              |   |             |              |             |   |              |              |              |   |              |              |             |   |              |              |              |   |             |             |             |   |             |             |              |   |              |              |              |
| 8                                                                                                                                                                                                                                                                                                                                                                                                                                                                                                                                                                                                                                                                                                                                                                                                                                                                                                                                                                                                                                                                                                                                                                                                                                                                                                               | -1.809249000 | 1.160604000  | 0.063150000  |              |   |              |              |              |   |              |              |              |   |              |              |              |   |             |              |              |   |              |              |              |   |              |              |              |   |              |              |             |   |              |              |              |   |              |             |             |   |              |             |             |   |              |              |              |                                                                                                                                                                                                                                                                                                                                                                                                                                                                                                                                                                                                                                                                                                                                                                                                                                                                                                                                                                                                                                                                                                                                                                                                                                                                                                                                                                                               |              |             |              |              |              |             |              |                                                                                                                                                                                                                                                                                                                                                                                                                                                                                                                                                                                                                                                                                                                                                                                                                                                                                                                                                                                                                                                                                                                                                                                                                           |   |             |              |              |   |             |              |              |   |              |              |              |   |             |              |              |   |             |              |              |   |              |              |              |   |             |              |             |   |              |              |              |   |              |              |             |   |              |              |              |   |             |             |             |   |             |             |              |   |              |              |              |
| 8                                                                                                                                                                                                                                                                                                                                                                                                                                                                                                                                                                                                                                                                                                                                                                                                                                                                                                                                                                                                                                                                                                                                                                                                                                                                                                               | -2.622201000 | -1.000964000 | 0.001200000  |              |   |              |              |              |   |              |              |              |   |              |              |              |   |             |              |              |   |              |              |              |   |              |              |              |   |              |              |             |   |              |              |              |   |              |             |             |   |              |             |             |   |              |              |              |                                                                                                                                                                                                                                                                                                                                                                                                                                                                                                                                                                                                                                                                                                                                                                                                                                                                                                                                                                                                                                                                                                                                                                                                                                                                                                                                                                                               |              |             |              |              |              |             |              |                                                                                                                                                                                                                                                                                                                                                                                                                                                                                                                                                                                                                                                                                                                                                                                                                                                                                                                                                                                                                                                                                                                                                                                                                           |   |             |              |              |   |             |              |              |   |              |              |              |   |             |              |              |   |             |              |              |   |              |              |              |   |             |              |             |   |              |              |              |   |              |              |             |   |              |              |              |   |             |             |             |   |             |             |              |   |              |              |              |
| 7                                                                                                                                                                                                                                                                                                                                                                                                                                                                                                                                                                                                                                                                                                                                                                                                                                                                                                                                                                                                                                                                                                                                                                                                                                                                                                               | 2.617485000  | -1.152526000 | -0.416644000 |              |   |              |              |              |   |              |              |              |   |              |              |              |   |             |              |              |   |              |              |              |   |              |              |              |   |              |              |             |   |              |              |              |   |              |             |             |   |              |             |             |   |              |              |              |                                                                                                                                                                                                                                                                                                                                                                                                                                                                                                                                                                                                                                                                                                                                                                                                                                                                                                                                                                                                                                                                                                                                                                                                                                                                                                                                                                                               |              |             |              |              |              |             |              |                                                                                                                                                                                                                                                                                                                                                                                                                                                                                                                                                                                                                                                                                                                                                                                                                                                                                                                                                                                                                                                                                                                                                                                                                           |   |             |              |              |   |             |              |              |   |              |              |              |   |             |              |              |   |             |              |              |   |              |              |              |   |             |              |             |   |              |              |              |   |              |              |             |   |              |              |              |   |             |             |             |   |             |             |              |   |              |              |              |
| 1                                                                                                                                                                                                                                                                                                                                                                                                                                                                                                                                                                                                                                                                                                                                                                                                                                                                                                                                                                                                                                                                                                                                                                                                                                                                                                               | 3.279350000  | -0.657774000 | 0.165441000  |              |   |              |              |              |   |              |              |              |   |              |              |              |   |             |              |              |   |              |              |              |   |              |              |              |   |              |              |             |   |              |              |              |   |              |             |             |   |              |             |             |   |              |              |              |                                                                                                                                                                                                                                                                                                                                                                                                                                                                                                                                                                                                                                                                                                                                                                                                                                                                                                                                                                                                                                                                                                                                                                                                                                                                                                                                                                                               |              |             |              |              |              |             |              |                                                                                                                                                                                                                                                                                                                                                                                                                                                                                                                                                                                                                                                                                                                                                                                                                                                                                                                                                                                                                                                                                                                                                                                                                           |   |             |              |              |   |             |              |              |   |              |              |              |   |             |              |              |   |             |              |              |   |              |              |              |   |             |              |             |   |              |              |              |   |              |              |             |   |              |              |              |   |             |             |             |   |             |             |              |   |              |              |              |
| 1                                                                                                                                                                                                                                                                                                                                                                                                                                                                                                                                                                                                                                                                                                                                                                                                                                                                                                                                                                                                                                                                                                                                                                                                                                                                                                               | 2.829795000  | -1.062146000 | -1.398903000 |              |   |              |              |              |   |              |              |              |   |              |              |              |   |             |              |              |   |              |              |              |   |              |              |              |   |              |              |             |   |              |              |              |   |              |             |             |   |              |             |             |   |              |              |              |                                                                                                                                                                                                                                                                                                                                                                                                                                                                                                                                                                                                                                                                                                                                                                                                                                                                                                                                                                                                                                                                                                                                                                                                                                                                                                                                                                                               |              |             |              |              |              |             |              |                                                                                                                                                                                                                                                                                                                                                                                                                                                                                                                                                                                                                                                                                                                                                                                                                                                                                                                                                                                                                                                                                                                                                                                                                           |   |             |              |              |   |             |              |              |   |              |              |              |   |             |              |              |   |             |              |              |   |              |              |              |   |             |              |             |   |              |              |              |   |              |              |             |   |              |              |              |   |             |             |             |   |             |             |              |   |              |              |              |
| 6                                                                                                                                                                                                                                                                                                                                                                                                                                                                                                                                                                                                                                                                                                                                                                                                                                                                                                                                                                                                                                                                                                                                                                                                                                                                                                               | 1.285161000  | -0.936225000 | -0.093271000 |              |   |              |              |              |   |              |              |              |   |              |              |              |   |             |              |              |   |              |              |              |   |              |              |              |   |              |              |             |   |              |              |              |   |              |             |             |   |              |             |             |   |              |              |              |                                                                                                                                                                                                                                                                                                                                                                                                                                                                                                                                                                                                                                                                                                                                                                                                                                                                                                                                                                                                                                                                                                                                                                                                                                                                                                                                                                                               |              |             |              |              |              |             |              |                                                                                                                                                                                                                                                                                                                                                                                                                                                                                                                                                                                                                                                                                                                                                                                                                                                                                                                                                                                                                                                                                                                                                                                                                           |   |             |              |              |   |             |              |              |   |              |              |              |   |             |              |              |   |             |              |              |   |              |              |              |   |             |              |             |   |              |              |              |   |              |              |             |   |              |              |              |   |             |             |             |   |             |             |              |   |              |              |              |
| 7                                                                                                                                                                                                                                                                                                                                                                                                                                                                                                                                                                                                                                                                                                                                                                                                                                                                                                                                                                                                                                                                                                                                                                                                                                                                                                               | 0.295601000  | -0.882613000 | -0.901470000 |              |   |              |              |              |   |              |              |              |   |              |              |              |   |             |              |              |   |              |              |              |   |              |              |              |   |              |              |             |   |              |              |              |   |              |             |             |   |              |             |             |   |              |              |              |                                                                                                                                                                                                                                                                                                                                                                                                                                                                                                                                                                                                                                                                                                                                                                                                                                                                                                                                                                                                                                                                                                                                                                                                                                                                                                                                                                                               |              |             |              |              |              |             |              |                                                                                                                                                                                                                                                                                                                                                                                                                                                                                                                                                                                                                                                                                                                                                                                                                                                                                                                                                                                                                                                                                                                                                                                                                           |   |             |              |              |   |             |              |              |   |              |              |              |   |             |              |              |   |             |              |              |   |              |              |              |   |             |              |             |   |              |              |              |   |              |              |             |   |              |              |              |   |             |             |             |   |             |             |              |   |              |              |              |
| 1                                                                                                                                                                                                                                                                                                                                                                                                                                                                                                                                                                                                                                                                                                                                                                                                                                                                                                                                                                                                                                                                                                                                                                                                                                                                                                               | 0.594619000  | -0.935196000 | -1.870846000 |              |   |              |              |              |   |              |              |              |   |              |              |              |   |             |              |              |   |              |              |              |   |              |              |              |   |              |              |             |   |              |              |              |   |              |             |             |   |              |             |             |   |              |              |              |                                                                                                                                                                                                                                                                                                                                                                                                                                                                                                                                                                                                                                                                                                                                                                                                                                                                                                                                                                                                                                                                                                                                                                                                                                                                                                                                                                                               |              |             |              |              |              |             |              |                                                                                                                                                                                                                                                                                                                                                                                                                                                                                                                                                                                                                                                                                                                                                                                                                                                                                                                                                                                                                                                                                                                                                                                                                           |   |             |              |              |   |             |              |              |   |              |              |              |   |             |              |              |   |             |              |              |   |              |              |              |   |             |              |             |   |              |              |              |   |              |              |             |   |              |              |              |   |             |             |             |   |             |             |              |   |              |              |              |
| 7                                                                                                                                                                                                                                                                                                                                                                                                                                                                                                                                                                                                                                                                                                                                                                                                                                                                                                                                                                                                                                                                                                                                                                                                                                                                                                               | 1.076885000  | -0.744893000 | 1.262073000  |              |   |              |              |              |   |              |              |              |   |              |              |              |   |             |              |              |   |              |              |              |   |              |              |              |   |              |              |             |   |              |              |              |   |              |             |             |   |              |             |             |   |              |              |              |                                                                                                                                                                                                                                                                                                                                                                                                                                                                                                                                                                                                                                                                                                                                                                                                                                                                                                                                                                                                                                                                                                                                                                                                                                                                                                                                                                                               |              |             |              |              |              |             |              |                                                                                                                                                                                                                                                                                                                                                                                                                                                                                                                                                                                                                                                                                                                                                                                                                                                                                                                                                                                                                                                                                                                                                                                                                           |   |             |              |              |   |             |              |              |   |              |              |              |   |             |              |              |   |             |              |              |   |              |              |              |   |             |              |             |   |              |              |              |   |              |              |             |   |              |              |              |   |             |             |             |   |             |             |              |   |              |              |              |
| 1                                                                                                                                                                                                                                                                                                                                                                                                                                                                                                                                                                                                                                                                                                                                                                                                                                                                                                                                                                                                                                                                                                                                                                                                                                                                                                               | 1.698852000  | -1.254894000 | 1.872387000  |              |   |              |              |              |   |              |              |              |   |              |              |              |   |             |              |              |   |              |              |              |   |              |              |              |   |              |              |             |   |              |              |              |   |              |             |             |   |              |             |             |   |              |              |              |                                                                                                                                                                                                                                                                                                                                                                                                                                                                                                                                                                                                                                                                                                                                                                                                                                                                                                                                                                                                                                                                                                                                                                                                                                                                                                                                                                                               |              |             |              |              |              |             |              |                                                                                                                                                                                                                                                                                                                                                                                                                                                                                                                                                                                                                                                                                                                                                                                                                                                                                                                                                                                                                                                                                                                                                                                                                           |   |             |              |              |   |             |              |              |   |              |              |              |   |             |              |              |   |             |              |              |   |              |              |              |   |             |              |             |   |              |              |              |   |              |              |             |   |              |              |              |   |             |             |             |   |             |             |              |   |              |              |              |
| 1                                                                                                                                                                                                                                                                                                                                                                                                                                                                                                                                                                                                                                                                                                                                                                                                                                                                                                                                                                                                                                                                                                                                                                                                                                                                                                               | 0.101064000  | -0.825688000 | 1.521761000  |              |   |              |              |              |   |              |              |              |   |              |              |              |   |             |              |              |   |              |              |              |   |              |              |              |   |              |              |             |   |              |              |              |   |              |             |             |   |              |             |             |   |              |              |              |                                                                                                                                                                                                                                                                                                                                                                                                                                                                                                                                                                                                                                                                                                                                                                                                                                                                                                                                                                                                                                                                                                                                                                                                                                                                                                                                                                                               |              |             |              |              |              |             |              |                                                                                                                                                                                                                                                                                                                                                                                                                                                                                                                                                                                                                                                                                                                                                                                                                                                                                                                                                                                                                                                                                                                                                                                                                           |   |             |              |              |   |             |              |              |   |              |              |              |   |             |              |              |   |             |              |              |   |              |              |              |   |             |              |             |   |              |              |              |   |              |              |             |   |              |              |              |   |             |             |             |   |             |             |              |   |              |              |              |
| 6                                                                                                                                                                                                                                                                                                                                                                                                                                                                                                                                                                                                                                                                                                                                                                                                                                                                                                                                                                                                                                                                                                                                                                                                                                                                                                               | -2.298318000 | -0.574372000 | -0.078495000 |              |   |              |              |              |   |              |              |              |   |              |              |              |   |             |              |              |   |              |              |              |   |              |              |              |   |              |              |             |   |              |              |              |   |              |             |             |   |              |             |             |   |              |              |              |                                                                                                                                                                                                                                                                                                                                                                                                                                                                                                                                                                                                                                                                                                                                                                                                                                                                                                                                                                                                                                                                                                                                                                                                                                                                                                                                                                                               |              |             |              |              |              |             |              |                                                                                                                                                                                                                                                                                                                                                                                                                                                                                                                                                                                                                                                                                                                                                                                                                                                                                                                                                                                                                                                                                                                                                                                                                           |   |             |              |              |   |             |              |              |   |              |              |              |   |             |              |              |   |             |              |              |   |              |              |              |   |             |              |             |   |              |              |              |   |              |              |             |   |              |              |              |   |             |             |             |   |             |             |              |   |              |              |              |
| 8                                                                                                                                                                                                                                                                                                                                                                                                                                                                                                                                                                                                                                                                                                                                                                                                                                                                                                                                                                                                                                                                                                                                                                                                                                                                                                               | -2.024786000 | -0.951436000 | 0.982978000  |              |   |              |              |              |   |              |              |              |   |              |              |              |   |             |              |              |   |              |              |              |   |              |              |              |   |              |              |             |   |              |              |              |   |              |             |             |   |              |             |             |   |              |              |              |                                                                                                                                                                                                                                                                                                                                                                                                                                                                                                                                                                                                                                                                                                                                                                                                                                                                                                                                                                                                                                                                                                                                                                                                                                                                                                                                                                                               |              |             |              |              |              |             |              |                                                                                                                                                                                                                                                                                                                                                                                                                                                                                                                                                                                                                                                                                                                                                                                                                                                                                                                                                                                                                                                                                                                                                                                                                           |   |             |              |              |   |             |              |              |   |              |              |              |   |             |              |              |   |             |              |              |   |              |              |              |   |             |              |             |   |              |              |              |   |              |              |             |   |              |              |              |   |             |             |             |   |             |             |              |   |              |              |              |
| 8                                                                                                                                                                                                                                                                                                                                                                                                                                                                                                                                                                                                                                                                                                                                                                                                                                                                                                                                                                                                                                                                                                                                                                                                                                                                                                               | -2.648280000 | -0.198189000 | -1.110186000 |              |   |              |              |              |   |              |              |              |   |              |              |              |   |             |              |              |   |              |              |              |   |              |              |              |   |              |              |             |   |              |              |              |   |              |             |             |   |              |             |             |   |              |              |              |                                                                                                                                                                                                                                                                                                                                                                                                                                                                                                                                                                                                                                                                                                                                                                                                                                                                                                                                                                                                                                                                                                                                                                                                                                                                                                                                                                                               |              |             |              |              |              |             |              |                                                                                                                                                                                                                                                                                                                                                                                                                                                                                                                                                                                                                                                                                                                                                                                                                                                                                                                                                                                                                                                                                                                                                                                                                           |   |             |              |              |   |             |              |              |   |              |              |              |   |             |              |              |   |             |              |              |   |              |              |              |   |             |              |             |   |              |              |              |   |              |              |             |   |              |              |              |   |             |             |             |   |             |             |              |   |              |              |              |
| 6                                                                                                                                                                                                                                                                                                                                                                                                                                                                                                                                                                                                                                                                                                                                                                                                                                                                                                                                                                                                                                                                                                                                                                                                                                                                                                               | 0.319936000  | 1.916935000  | 0.095025000  |              |   |              |              |              |   |              |              |              |   |              |              |              |   |             |              |              |   |              |              |              |   |              |              |              |   |              |              |             |   |              |              |              |   |              |             |             |   |              |             |             |   |              |              |              |                                                                                                                                                                                                                                                                                                                                                                                                                                                                                                                                                                                                                                                                                                                                                                                                                                                                                                                                                                                                                                                                                                                                                                                                                                                                                                                                                                                               |              |             |              |              |              |             |              |                                                                                                                                                                                                                                                                                                                                                                                                                                                                                                                                                                                                                                                                                                                                                                                                                                                                                                                                                                                                                                                                                                                                                                                                                           |   |             |              |              |   |             |              |              |   |              |              |              |   |             |              |              |   |             |              |              |   |              |              |              |   |             |              |             |   |              |              |              |   |              |              |             |   |              |              |              |   |             |             |             |   |             |             |              |   |              |              |              |
| 8                                                                                                                                                                                                                                                                                                                                                                                                                                                                                                                                                                                                                                                                                                                                                                                                                                                                                                                                                                                                                                                                                                                                                                                                                                                                                                               | 1.375484000  | 2.089383000  | -0.343253000 |              |   |              |              |              |   |              |              |              |   |              |              |              |   |             |              |              |   |              |              |              |   |              |              |              |   |              |              |             |   |              |              |              |   |              |             |             |   |              |             |             |   |              |              |              |                                                                                                                                                                                                                                                                                                                                                                                                                                                                                                                                                                                                                                                                                                                                                                                                                                                                                                                                                                                                                                                                                                                                                                                                                                                                                                                                                                                               |              |             |              |              |              |             |              |                                                                                                                                                                                                                                                                                                                                                                                                                                                                                                                                                                                                                                                                                                                                                                                                                                                                                                                                                                                                                                                                                                                                                                                                                           |   |             |              |              |   |             |              |              |   |              |              |              |   |             |              |              |   |             |              |              |   |              |              |              |   |             |              |             |   |              |              |              |   |              |              |             |   |              |              |              |   |             |             |             |   |             |             |              |   |              |              |              |
| 8                                                                                                                                                                                                                                                                                                                                                                                                                                                                                                                                                                                                                                                                                                                                                                                                                                                                                                                                                                                                                                                                                                                                                                                                                                                                                                               | -0.736688000 | 1.779979000  | 0.540822000  |              |   |              |              |              |   |              |              |              |   |              |              |              |   |             |              |              |   |              |              |              |   |              |              |              |   |              |              |             |   |              |              |              |   |              |             |             |   |              |             |             |   |              |              |              |                                                                                                                                                                                                                                                                                                                                                                                                                                                                                                                                                                                                                                                                                                                                                                                                                                                                                                                                                                                                                                                                                                                                                                                                                                                                                                                                                                                               |              |             |              |              |              |             |              |                                                                                                                                                                                                                                                                                                                                                                                                                                                                                                                                                                                                                                                                                                                                                                                                                                                                                                                                                                                                                                                                                                                                                                                                                           |   |             |              |              |   |             |              |              |   |              |              |              |   |             |              |              |   |             |              |              |   |              |              |              |   |             |              |             |   |              |              |              |   |              |              |             |   |              |              |              |   |             |             |             |   |             |             |              |   |              |              |              |
| <p><b><math>G(\text{CO}_2)_3</math></b><br/> <b>SCF E = -771.104458776 a.u.</b></p> <table> <tbody> <tr><td>7</td><td>-2.142772000</td><td>-1.858719000</td><td>-0.015205000</td></tr> <tr><td>1</td><td>-2.613080000</td><td>-2.549410000</td><td>0.552435000</td></tr> <tr><td>1</td><td>-2.124841000</td><td>-2.094626000</td><td>-0.996600000</td></tr> <tr><td>6</td><td>-0.948000000</td><td>-1.371660000</td><td>0.500136000</td></tr> <tr><td>7</td><td>0.049828000</td><td>-0.952893000</td><td>-0.186383000</td></tr> <tr><td>1</td><td>-0.066419000</td><td>-1.149097000</td><td>-1.177883000</td></tr> <tr><td>7</td><td>-0.924191000</td><td>-1.330127000</td><td>1.876887000</td></tr> <tr><td>1</td><td>-1.802411000</td><td>-1.094085000</td><td>2.316866000</td></tr> <tr><td>1</td><td>-0.146519000</td><td>-0.790743000</td><td>2.233516000</td></tr> <tr><td>6</td><td>0.791280000</td><td>1.615380000</td><td>0.694333000</td></tr> <tr><td>8</td><td>0.652261000</td><td>1.336785000</td><td>1.807263000</td></tr> <tr><td>8</td><td>0.935604000</td><td>1.949271000</td><td>-0.402783000</td></tr> <tr><td>6</td><td>-2.060789000</td><td>1.050235000</td><td>-0.917120000</td></tr> <tr><td>8</td><td>-2.057943000</td><td>0.605410000</td><td>-1.983099000</td></tr> </tbody> </table> | 7            | -2.142772000 | -1.858719000 | -0.015205000 | 1 | -2.613080000 | -2.549410000 | 0.552435000  | 1 | -2.124841000 | -2.094626000 | -0.996600000 | 6 | -0.948000000 | -1.371660000 | 0.500136000  | 7 | 0.049828000 | -0.952893000 | -0.186383000 | 1 | -0.066419000 | -1.149097000 | -1.177883000 | 7 | -0.924191000 | -1.330127000 | 1.876887000  | 1 | -1.802411000 | -1.094085000 | 2.316866000 | 1 | -0.146519000 | -0.790743000 | 2.233516000  | 6 | 0.791280000  | 1.615380000 | 0.694333000 | 8 | 0.652261000  | 1.336785000 | 1.807263000 | 8 | 0.935604000  | 1.949271000  | -0.402783000 | 6                                                                                                                                                                                                                                                                                                                                                                                                                                                                                                                                                                                                                                                                                                                                                                                                                                                                                                                                                                                                                                                                                                                                                                                                                                                                                                                                                                                             | -2.060789000 | 1.050235000 | -0.917120000 | 8            | -2.057943000 | 0.605410000 | -1.983099000 | <p><b><math>G(\text{CO}_2)_4</math></b><br/> <b>SCF E = -959.688469532 a.u.</b></p> <table> <tbody> <tr><td>7</td><td>0.056817000</td><td>-2.631926000</td><td>-0.602352000</td></tr> <tr><td>1</td><td>0.652577000</td><td>-3.409339000</td><td>-0.353164000</td></tr> <tr><td>1</td><td>-0.159304000</td><td>-2.604393000</td><td>-1.588157000</td></tr> <tr><td>6</td><td>0.406067000</td><td>-1.411341000</td><td>-0.045919000</td></tr> <tr><td>7</td><td>0.205096000</td><td>-0.258664000</td><td>-0.572985000</td></tr> <tr><td>1</td><td>-0.123261000</td><td>-0.340609000</td><td>-1.532629000</td></tr> <tr><td>7</td><td>1.008345000</td><td>-1.517012000</td><td>1.189623000</td></tr> <tr><td>1</td><td>0.685965000</td><td>-2.285572000</td><td>1.760903000</td></tr> <tr><td>1</td><td>1.029815000</td><td>-0.635975000</td><td>1.689451000</td></tr> <tr><td>6</td><td>0.697527000</td><td>2.086910000</td><td>0.899841000</td></tr> <tr><td>8</td><td>0.763159000</td><td>1.482580000</td><td>1.884732000</td></tr> <tr><td>8</td><td>0.634169000</td><td>2.742251000</td><td>-0.047799000</td></tr> <tr><td>6</td><td>3.148935000</td><td>-0.201879000</td><td>-0.537550000</td></tr> </tbody> </table> | 7 | 0.056817000 | -2.631926000 | -0.602352000 | 1 | 0.652577000 | -3.409339000 | -0.353164000 | 1 | -0.159304000 | -2.604393000 | -1.588157000 | 6 | 0.406067000 | -1.411341000 | -0.045919000 | 7 | 0.205096000 | -0.258664000 | -0.572985000 | 1 | -0.123261000 | -0.340609000 | -1.532629000 | 7 | 1.008345000 | -1.517012000 | 1.189623000 | 1 | 0.685965000  | -2.285572000 | 1.760903000  | 1 | 1.029815000  | -0.635975000 | 1.689451000 | 6 | 0.697527000  | 2.086910000  | 0.899841000  | 8 | 0.763159000 | 1.482580000 | 1.884732000 | 8 | 0.634169000 | 2.742251000 | -0.047799000 | 6 | 3.148935000  | -0.201879000 | -0.537550000 |
| 7                                                                                                                                                                                                                                                                                                                                                                                                                                                                                                                                                                                                                                                                                                                                                                                                                                                                                                                                                                                                                                                                                                                                                                                                                                                                                                               | -2.142772000 | -1.858719000 | -0.015205000 |              |   |              |              |              |   |              |              |              |   |              |              |              |   |             |              |              |   |              |              |              |   |              |              |              |   |              |              |             |   |              |              |              |   |              |             |             |   |              |             |             |   |              |              |              |                                                                                                                                                                                                                                                                                                                                                                                                                                                                                                                                                                                                                                                                                                                                                                                                                                                                                                                                                                                                                                                                                                                                                                                                                                                                                                                                                                                               |              |             |              |              |              |             |              |                                                                                                                                                                                                                                                                                                                                                                                                                                                                                                                                                                                                                                                                                                                                                                                                                                                                                                                                                                                                                                                                                                                                                                                                                           |   |             |              |              |   |             |              |              |   |              |              |              |   |             |              |              |   |             |              |              |   |              |              |              |   |             |              |             |   |              |              |              |   |              |              |             |   |              |              |              |   |             |             |             |   |             |             |              |   |              |              |              |
| 1                                                                                                                                                                                                                                                                                                                                                                                                                                                                                                                                                                                                                                                                                                                                                                                                                                                                                                                                                                                                                                                                                                                                                                                                                                                                                                               | -2.613080000 | -2.549410000 | 0.552435000  |              |   |              |              |              |   |              |              |              |   |              |              |              |   |             |              |              |   |              |              |              |   |              |              |              |   |              |              |             |   |              |              |              |   |              |             |             |   |              |             |             |   |              |              |              |                                                                                                                                                                                                                                                                                                                                                                                                                                                                                                                                                                                                                                                                                                                                                                                                                                                                                                                                                                                                                                                                                                                                                                                                                                                                                                                                                                                               |              |             |              |              |              |             |              |                                                                                                                                                                                                                                                                                                                                                                                                                                                                                                                                                                                                                                                                                                                                                                                                                                                                                                                                                                                                                                                                                                                                                                                                                           |   |             |              |              |   |             |              |              |   |              |              |              |   |             |              |              |   |             |              |              |   |              |              |              |   |             |              |             |   |              |              |              |   |              |              |             |   |              |              |              |   |             |             |             |   |             |             |              |   |              |              |              |
| 1                                                                                                                                                                                                                                                                                                                                                                                                                                                                                                                                                                                                                                                                                                                                                                                                                                                                                                                                                                                                                                                                                                                                                                                                                                                                                                               | -2.124841000 | -2.094626000 | -0.996600000 |              |   |              |              |              |   |              |              |              |   |              |              |              |   |             |              |              |   |              |              |              |   |              |              |              |   |              |              |             |   |              |              |              |   |              |             |             |   |              |             |             |   |              |              |              |                                                                                                                                                                                                                                                                                                                                                                                                                                                                                                                                                                                                                                                                                                                                                                                                                                                                                                                                                                                                                                                                                                                                                                                                                                                                                                                                                                                               |              |             |              |              |              |             |              |                                                                                                                                                                                                                                                                                                                                                                                                                                                                                                                                                                                                                                                                                                                                                                                                                                                                                                                                                                                                                                                                                                                                                                                                                           |   |             |              |              |   |             |              |              |   |              |              |              |   |             |              |              |   |             |              |              |   |              |              |              |   |             |              |             |   |              |              |              |   |              |              |             |   |              |              |              |   |             |             |             |   |             |             |              |   |              |              |              |
| 6                                                                                                                                                                                                                                                                                                                                                                                                                                                                                                                                                                                                                                                                                                                                                                                                                                                                                                                                                                                                                                                                                                                                                                                                                                                                                                               | -0.948000000 | -1.371660000 | 0.500136000  |              |   |              |              |              |   |              |              |              |   |              |              |              |   |             |              |              |   |              |              |              |   |              |              |              |   |              |              |             |   |              |              |              |   |              |             |             |   |              |             |             |   |              |              |              |                                                                                                                                                                                                                                                                                                                                                                                                                                                                                                                                                                                                                                                                                                                                                                                                                                                                                                                                                                                                                                                                                                                                                                                                                                                                                                                                                                                               |              |             |              |              |              |             |              |                                                                                                                                                                                                                                                                                                                                                                                                                                                                                                                                                                                                                                                                                                                                                                                                                                                                                                                                                                                                                                                                                                                                                                                                                           |   |             |              |              |   |             |              |              |   |              |              |              |   |             |              |              |   |             |              |              |   |              |              |              |   |             |              |             |   |              |              |              |   |              |              |             |   |              |              |              |   |             |             |             |   |             |             |              |   |              |              |              |
| 7                                                                                                                                                                                                                                                                                                                                                                                                                                                                                                                                                                                                                                                                                                                                                                                                                                                                                                                                                                                                                                                                                                                                                                                                                                                                                                               | 0.049828000  | -0.952893000 | -0.186383000 |              |   |              |              |              |   |              |              |              |   |              |              |              |   |             |              |              |   |              |              |              |   |              |              |              |   |              |              |             |   |              |              |              |   |              |             |             |   |              |             |             |   |              |              |              |                                                                                                                                                                                                                                                                                                                                                                                                                                                                                                                                                                                                                                                                                                                                                                                                                                                                                                                                                                                                                                                                                                                                                                                                                                                                                                                                                                                               |              |             |              |              |              |             |              |                                                                                                                                                                                                                                                                                                                                                                                                                                                                                                                                                                                                                                                                                                                                                                                                                                                                                                                                                                                                                                                                                                                                                                                                                           |   |             |              |              |   |             |              |              |   |              |              |              |   |             |              |              |   |             |              |              |   |              |              |              |   |             |              |             |   |              |              |              |   |              |              |             |   |              |              |              |   |             |             |             |   |             |             |              |   |              |              |              |
| 1                                                                                                                                                                                                                                                                                                                                                                                                                                                                                                                                                                                                                                                                                                                                                                                                                                                                                                                                                                                                                                                                                                                                                                                                                                                                                                               | -0.066419000 | -1.149097000 | -1.177883000 |              |   |              |              |              |   |              |              |              |   |              |              |              |   |             |              |              |   |              |              |              |   |              |              |              |   |              |              |             |   |              |              |              |   |              |             |             |   |              |             |             |   |              |              |              |                                                                                                                                                                                                                                                                                                                                                                                                                                                                                                                                                                                                                                                                                                                                                                                                                                                                                                                                                                                                                                                                                                                                                                                                                                                                                                                                                                                               |              |             |              |              |              |             |              |                                                                                                                                                                                                                                                                                                                                                                                                                                                                                                                                                                                                                                                                                                                                                                                                                                                                                                                                                                                                                                                                                                                                                                                                                           |   |             |              |              |   |             |              |              |   |              |              |              |   |             |              |              |   |             |              |              |   |              |              |              |   |             |              |             |   |              |              |              |   |              |              |             |   |              |              |              |   |             |             |             |   |             |             |              |   |              |              |              |
| 7                                                                                                                                                                                                                                                                                                                                                                                                                                                                                                                                                                                                                                                                                                                                                                                                                                                                                                                                                                                                                                                                                                                                                                                                                                                                                                               | -0.924191000 | -1.330127000 | 1.876887000  |              |   |              |              |              |   |              |              |              |   |              |              |              |   |             |              |              |   |              |              |              |   |              |              |              |   |              |              |             |   |              |              |              |   |              |             |             |   |              |             |             |   |              |              |              |                                                                                                                                                                                                                                                                                                                                                                                                                                                                                                                                                                                                                                                                                                                                                                                                                                                                                                                                                                                                                                                                                                                                                                                                                                                                                                                                                                                               |              |             |              |              |              |             |              |                                                                                                                                                                                                                                                                                                                                                                                                                                                                                                                                                                                                                                                                                                                                                                                                                                                                                                                                                                                                                                                                                                                                                                                                                           |   |             |              |              |   |             |              |              |   |              |              |              |   |             |              |              |   |             |              |              |   |              |              |              |   |             |              |             |   |              |              |              |   |              |              |             |   |              |              |              |   |             |             |             |   |             |             |              |   |              |              |              |
| 1                                                                                                                                                                                                                                                                                                                                                                                                                                                                                                                                                                                                                                                                                                                                                                                                                                                                                                                                                                                                                                                                                                                                                                                                                                                                                                               | -1.802411000 | -1.094085000 | 2.316866000  |              |   |              |              |              |   |              |              |              |   |              |              |              |   |             |              |              |   |              |              |              |   |              |              |              |   |              |              |             |   |              |              |              |   |              |             |             |   |              |             |             |   |              |              |              |                                                                                                                                                                                                                                                                                                                                                                                                                                                                                                                                                                                                                                                                                                                                                                                                                                                                                                                                                                                                                                                                                                                                                                                                                                                                                                                                                                                               |              |             |              |              |              |             |              |                                                                                                                                                                                                                                                                                                                                                                                                                                                                                                                                                                                                                                                                                                                                                                                                                                                                                                                                                                                                                                                                                                                                                                                                                           |   |             |              |              |   |             |              |              |   |              |              |              |   |             |              |              |   |             |              |              |   |              |              |              |   |             |              |             |   |              |              |              |   |              |              |             |   |              |              |              |   |             |             |             |   |             |             |              |   |              |              |              |
| 1                                                                                                                                                                                                                                                                                                                                                                                                                                                                                                                                                                                                                                                                                                                                                                                                                                                                                                                                                                                                                                                                                                                                                                                                                                                                                                               | -0.146519000 | -0.790743000 | 2.233516000  |              |   |              |              |              |   |              |              |              |   |              |              |              |   |             |              |              |   |              |              |              |   |              |              |              |   |              |              |             |   |              |              |              |   |              |             |             |   |              |             |             |   |              |              |              |                                                                                                                                                                                                                                                                                                                                                                                                                                                                                                                                                                                                                                                                                                                                                                                                                                                                                                                                                                                                                                                                                                                                                                                                                                                                                                                                                                                               |              |             |              |              |              |             |              |                                                                                                                                                                                                                                                                                                                                                                                                                                                                                                                                                                                                                                                                                                                                                                                                                                                                                                                                                                                                                                                                                                                                                                                                                           |   |             |              |              |   |             |              |              |   |              |              |              |   |             |              |              |   |             |              |              |   |              |              |              |   |             |              |             |   |              |              |              |   |              |              |             |   |              |              |              |   |             |             |             |   |             |             |              |   |              |              |              |
| 6                                                                                                                                                                                                                                                                                                                                                                                                                                                                                                                                                                                                                                                                                                                                                                                                                                                                                                                                                                                                                                                                                                                                                                                                                                                                                                               | 0.791280000  | 1.615380000  | 0.694333000  |              |   |              |              |              |   |              |              |              |   |              |              |              |   |             |              |              |   |              |              |              |   |              |              |              |   |              |              |             |   |              |              |              |   |              |             |             |   |              |             |             |   |              |              |              |                                                                                                                                                                                                                                                                                                                                                                                                                                                                                                                                                                                                                                                                                                                                                                                                                                                                                                                                                                                                                                                                                                                                                                                                                                                                                                                                                                                               |              |             |              |              |              |             |              |                                                                                                                                                                                                                                                                                                                                                                                                                                                                                                                                                                                                                                                                                                                                                                                                                                                                                                                                                                                                                                                                                                                                                                                                                           |   |             |              |              |   |             |              |              |   |              |              |              |   |             |              |              |   |             |              |              |   |              |              |              |   |             |              |             |   |              |              |              |   |              |              |             |   |              |              |              |   |             |             |             |   |             |             |              |   |              |              |              |
| 8                                                                                                                                                                                                                                                                                                                                                                                                                                                                                                                                                                                                                                                                                                                                                                                                                                                                                                                                                                                                                                                                                                                                                                                                                                                                                                               | 0.652261000  | 1.336785000  | 1.807263000  |              |   |              |              |              |   |              |              |              |   |              |              |              |   |             |              |              |   |              |              |              |   |              |              |              |   |              |              |             |   |              |              |              |   |              |             |             |   |              |             |             |   |              |              |              |                                                                                                                                                                                                                                                                                                                                                                                                                                                                                                                                                                                                                                                                                                                                                                                                                                                                                                                                                                                                                                                                                                                                                                                                                                                                                                                                                                                               |              |             |              |              |              |             |              |                                                                                                                                                                                                                                                                                                                                                                                                                                                                                                                                                                                                                                                                                                                                                                                                                                                                                                                                                                                                                                                                                                                                                                                                                           |   |             |              |              |   |             |              |              |   |              |              |              |   |             |              |              |   |             |              |              |   |              |              |              |   |             |              |             |   |              |              |              |   |              |              |             |   |              |              |              |   |             |             |             |   |             |             |              |   |              |              |              |
| 8                                                                                                                                                                                                                                                                                                                                                                                                                                                                                                                                                                                                                                                                                                                                                                                                                                                                                                                                                                                                                                                                                                                                                                                                                                                                                                               | 0.935604000  | 1.949271000  | -0.402783000 |              |   |              |              |              |   |              |              |              |   |              |              |              |   |             |              |              |   |              |              |              |   |              |              |              |   |              |              |             |   |              |              |              |   |              |             |             |   |              |             |             |   |              |              |              |                                                                                                                                                                                                                                                                                                                                                                                                                                                                                                                                                                                                                                                                                                                                                                                                                                                                                                                                                                                                                                                                                                                                                                                                                                                                                                                                                                                               |              |             |              |              |              |             |              |                                                                                                                                                                                                                                                                                                                                                                                                                                                                                                                                                                                                                                                                                                                                                                                                                                                                                                                                                                                                                                                                                                                                                                                                                           |   |             |              |              |   |             |              |              |   |              |              |              |   |             |              |              |   |             |              |              |   |              |              |              |   |             |              |             |   |              |              |              |   |              |              |             |   |              |              |              |   |             |             |             |   |             |             |              |   |              |              |              |
| 6                                                                                                                                                                                                                                                                                                                                                                                                                                                                                                                                                                                                                                                                                                                                                                                                                                                                                                                                                                                                                                                                                                                                                                                                                                                                                                               | -2.060789000 | 1.050235000  | -0.917120000 |              |   |              |              |              |   |              |              |              |   |              |              |              |   |             |              |              |   |              |              |              |   |              |              |              |   |              |              |             |   |              |              |              |   |              |             |             |   |              |             |             |   |              |              |              |                                                                                                                                                                                                                                                                                                                                                                                                                                                                                                                                                                                                                                                                                                                                                                                                                                                                                                                                                                                                                                                                                                                                                                                                                                                                                                                                                                                               |              |             |              |              |              |             |              |                                                                                                                                                                                                                                                                                                                                                                                                                                                                                                                                                                                                                                                                                                                                                                                                                                                                                                                                                                                                                                                                                                                                                                                                                           |   |             |              |              |   |             |              |              |   |              |              |              |   |             |              |              |   |             |              |              |   |              |              |              |   |             |              |             |   |              |              |              |   |              |              |             |   |              |              |              |   |             |             |             |   |             |             |              |   |              |              |              |
| 8                                                                                                                                                                                                                                                                                                                                                                                                                                                                                                                                                                                                                                                                                                                                                                                                                                                                                                                                                                                                                                                                                                                                                                                                                                                                                                               | -2.057943000 | 0.605410000  | -1.983099000 |              |   |              |              |              |   |              |              |              |   |              |              |              |   |             |              |              |   |              |              |              |   |              |              |              |   |              |              |             |   |              |              |              |   |              |             |             |   |              |             |             |   |              |              |              |                                                                                                                                                                                                                                                                                                                                                                                                                                                                                                                                                                                                                                                                                                                                                                                                                                                                                                                                                                                                                                                                                                                                                                                                                                                                                                                                                                                               |              |             |              |              |              |             |              |                                                                                                                                                                                                                                                                                                                                                                                                                                                                                                                                                                                                                                                                                                                                                                                                                                                                                                                                                                                                                                                                                                                                                                                                                           |   |             |              |              |   |             |              |              |   |              |              |              |   |             |              |              |   |             |              |              |   |              |              |              |   |             |              |             |   |              |              |              |   |              |              |             |   |              |              |              |   |             |             |             |   |             |             |              |   |              |              |              |
| 7                                                                                                                                                                                                                                                                                                                                                                                                                                                                                                                                                                                                                                                                                                                                                                                                                                                                                                                                                                                                                                                                                                                                                                                                                                                                                                               | 0.056817000  | -2.631926000 | -0.602352000 |              |   |              |              |              |   |              |              |              |   |              |              |              |   |             |              |              |   |              |              |              |   |              |              |              |   |              |              |             |   |              |              |              |   |              |             |             |   |              |             |             |   |              |              |              |                                                                                                                                                                                                                                                                                                                                                                                                                                                                                                                                                                                                                                                                                                                                                                                                                                                                                                                                                                                                                                                                                                                                                                                                                                                                                                                                                                                               |              |             |              |              |              |             |              |                                                                                                                                                                                                                                                                                                                                                                                                                                                                                                                                                                                                                                                                                                                                                                                                                                                                                                                                                                                                                                                                                                                                                                                                                           |   |             |              |              |   |             |              |              |   |              |              |              |   |             |              |              |   |             |              |              |   |              |              |              |   |             |              |             |   |              |              |              |   |              |              |             |   |              |              |              |   |             |             |             |   |             |             |              |   |              |              |              |
| 1                                                                                                                                                                                                                                                                                                                                                                                                                                                                                                                                                                                                                                                                                                                                                                                                                                                                                                                                                                                                                                                                                                                                                                                                                                                                                                               | 0.652577000  | -3.409339000 | -0.353164000 |              |   |              |              |              |   |              |              |              |   |              |              |              |   |             |              |              |   |              |              |              |   |              |              |              |   |              |              |             |   |              |              |              |   |              |             |             |   |              |             |             |   |              |              |              |                                                                                                                                                                                                                                                                                                                                                                                                                                                                                                                                                                                                                                                                                                                                                                                                                                                                                                                                                                                                                                                                                                                                                                                                                                                                                                                                                                                               |              |             |              |              |              |             |              |                                                                                                                                                                                                                                                                                                                                                                                                                                                                                                                                                                                                                                                                                                                                                                                                                                                                                                                                                                                                                                                                                                                                                                                                                           |   |             |              |              |   |             |              |              |   |              |              |              |   |             |              |              |   |             |              |              |   |              |              |              |   |             |              |             |   |              |              |              |   |              |              |             |   |              |              |              |   |             |             |             |   |             |             |              |   |              |              |              |
| 1                                                                                                                                                                                                                                                                                                                                                                                                                                                                                                                                                                                                                                                                                                                                                                                                                                                                                                                                                                                                                                                                                                                                                                                                                                                                                                               | -0.159304000 | -2.604393000 | -1.588157000 |              |   |              |              |              |   |              |              |              |   |              |              |              |   |             |              |              |   |              |              |              |   |              |              |              |   |              |              |             |   |              |              |              |   |              |             |             |   |              |             |             |   |              |              |              |                                                                                                                                                                                                                                                                                                                                                                                                                                                                                                                                                                                                                                                                                                                                                                                                                                                                                                                                                                                                                                                                                                                                                                                                                                                                                                                                                                                               |              |             |              |              |              |             |              |                                                                                                                                                                                                                                                                                                                                                                                                                                                                                                                                                                                                                                                                                                                                                                                                                                                                                                                                                                                                                                                                                                                                                                                                                           |   |             |              |              |   |             |              |              |   |              |              |              |   |             |              |              |   |             |              |              |   |              |              |              |   |             |              |             |   |              |              |              |   |              |              |             |   |              |              |              |   |             |             |             |   |             |             |              |   |              |              |              |
| 6                                                                                                                                                                                                                                                                                                                                                                                                                                                                                                                                                                                                                                                                                                                                                                                                                                                                                                                                                                                                                                                                                                                                                                                                                                                                                                               | 0.406067000  | -1.411341000 | -0.045919000 |              |   |              |              |              |   |              |              |              |   |              |              |              |   |             |              |              |   |              |              |              |   |              |              |              |   |              |              |             |   |              |              |              |   |              |             |             |   |              |             |             |   |              |              |              |                                                                                                                                                                                                                                                                                                                                                                                                                                                                                                                                                                                                                                                                                                                                                                                                                                                                                                                                                                                                                                                                                                                                                                                                                                                                                                                                                                                               |              |             |              |              |              |             |              |                                                                                                                                                                                                                                                                                                                                                                                                                                                                                                                                                                                                                                                                                                                                                                                                                                                                                                                                                                                                                                                                                                                                                                                                                           |   |             |              |              |   |             |              |              |   |              |              |              |   |             |              |              |   |             |              |              |   |              |              |              |   |             |              |             |   |              |              |              |   |              |              |             |   |              |              |              |   |             |             |             |   |             |             |              |   |              |              |              |
| 7                                                                                                                                                                                                                                                                                                                                                                                                                                                                                                                                                                                                                                                                                                                                                                                                                                                                                                                                                                                                                                                                                                                                                                                                                                                                                                               | 0.205096000  | -0.258664000 | -0.572985000 |              |   |              |              |              |   |              |              |              |   |              |              |              |   |             |              |              |   |              |              |              |   |              |              |              |   |              |              |             |   |              |              |              |   |              |             |             |   |              |             |             |   |              |              |              |                                                                                                                                                                                                                                                                                                                                                                                                                                                                                                                                                                                                                                                                                                                                                                                                                                                                                                                                                                                                                                                                                                                                                                                                                                                                                                                                                                                               |              |             |              |              |              |             |              |                                                                                                                                                                                                                                                                                                                                                                                                                                                                                                                                                                                                                                                                                                                                                                                                                                                                                                                                                                                                                                                                                                                                                                                                                           |   |             |              |              |   |             |              |              |   |              |              |              |   |             |              |              |   |             |              |              |   |              |              |              |   |             |              |             |   |              |              |              |   |              |              |             |   |              |              |              |   |             |             |             |   |             |             |              |   |              |              |              |
| 1                                                                                                                                                                                                                                                                                                                                                                                                                                                                                                                                                                                                                                                                                                                                                                                                                                                                                                                                                                                                                                                                                                                                                                                                                                                                                                               | -0.123261000 | -0.340609000 | -1.532629000 |              |   |              |              |              |   |              |              |              |   |              |              |              |   |             |              |              |   |              |              |              |   |              |              |              |   |              |              |             |   |              |              |              |   |              |             |             |   |              |             |             |   |              |              |              |                                                                                                                                                                                                                                                                                                                                                                                                                                                                                                                                                                                                                                                                                                                                                                                                                                                                                                                                                                                                                                                                                                                                                                                                                                                                                                                                                                                               |              |             |              |              |              |             |              |                                                                                                                                                                                                                                                                                                                                                                                                                                                                                                                                                                                                                                                                                                                                                                                                                                                                                                                                                                                                                                                                                                                                                                                                                           |   |             |              |              |   |             |              |              |   |              |              |              |   |             |              |              |   |             |              |              |   |              |              |              |   |             |              |             |   |              |              |              |   |              |              |             |   |              |              |              |   |             |             |             |   |             |             |              |   |              |              |              |
| 7                                                                                                                                                                                                                                                                                                                                                                                                                                                                                                                                                                                                                                                                                                                                                                                                                                                                                                                                                                                                                                                                                                                                                                                                                                                                                                               | 1.008345000  | -1.517012000 | 1.189623000  |              |   |              |              |              |   |              |              |              |   |              |              |              |   |             |              |              |   |              |              |              |   |              |              |              |   |              |              |             |   |              |              |              |   |              |             |             |   |              |             |             |   |              |              |              |                                                                                                                                                                                                                                                                                                                                                                                                                                                                                                                                                                                                                                                                                                                                                                                                                                                                                                                                                                                                                                                                                                                                                                                                                                                                                                                                                                                               |              |             |              |              |              |             |              |                                                                                                                                                                                                                                                                                                                                                                                                                                                                                                                                                                                                                                                                                                                                                                                                                                                                                                                                                                                                                                                                                                                                                                                                                           |   |             |              |              |   |             |              |              |   |              |              |              |   |             |              |              |   |             |              |              |   |              |              |              |   |             |              |             |   |              |              |              |   |              |              |             |   |              |              |              |   |             |             |             |   |             |             |              |   |              |              |              |
| 1                                                                                                                                                                                                                                                                                                                                                                                                                                                                                                                                                                                                                                                                                                                                                                                                                                                                                                                                                                                                                                                                                                                                                                                                                                                                                                               | 0.685965000  | -2.285572000 | 1.760903000  |              |   |              |              |              |   |              |              |              |   |              |              |              |   |             |              |              |   |              |              |              |   |              |              |              |   |              |              |             |   |              |              |              |   |              |             |             |   |              |             |             |   |              |              |              |                                                                                                                                                                                                                                                                                                                                                                                                                                                                                                                                                                                                                                                                                                                                                                                                                                                                                                                                                                                                                                                                                                                                                                                                                                                                                                                                                                                               |              |             |              |              |              |             |              |                                                                                                                                                                                                                                                                                                                                                                                                                                                                                                                                                                                                                                                                                                                                                                                                                                                                                                                                                                                                                                                                                                                                                                                                                           |   |             |              |              |   |             |              |              |   |              |              |              |   |             |              |              |   |             |              |              |   |              |              |              |   |             |              |             |   |              |              |              |   |              |              |             |   |              |              |              |   |             |             |             |   |             |             |              |   |              |              |              |
| 1                                                                                                                                                                                                                                                                                                                                                                                                                                                                                                                                                                                                                                                                                                                                                                                                                                                                                                                                                                                                                                                                                                                                                                                                                                                                                                               | 1.029815000  | -0.635975000 | 1.689451000  |              |   |              |              |              |   |              |              |              |   |              |              |              |   |             |              |              |   |              |              |              |   |              |              |              |   |              |              |             |   |              |              |              |   |              |             |             |   |              |             |             |   |              |              |              |                                                                                                                                                                                                                                                                                                                                                                                                                                                                                                                                                                                                                                                                                                                                                                                                                                                                                                                                                                                                                                                                                                                                                                                                                                                                                                                                                                                               |              |             |              |              |              |             |              |                                                                                                                                                                                                                                                                                                                                                                                                                                                                                                                                                                                                                                                                                                                                                                                                                                                                                                                                                                                                                                                                                                                                                                                                                           |   |             |              |              |   |             |              |              |   |              |              |              |   |             |              |              |   |             |              |              |   |              |              |              |   |             |              |             |   |              |              |              |   |              |              |             |   |              |              |              |   |             |             |             |   |             |             |              |   |              |              |              |
| 6                                                                                                                                                                                                                                                                                                                                                                                                                                                                                                                                                                                                                                                                                                                                                                                                                                                                                                                                                                                                                                                                                                                                                                                                                                                                                                               | 0.697527000  | 2.086910000  | 0.899841000  |              |   |              |              |              |   |              |              |              |   |              |              |              |   |             |              |              |   |              |              |              |   |              |              |              |   |              |              |             |   |              |              |              |   |              |             |             |   |              |             |             |   |              |              |              |                                                                                                                                                                                                                                                                                                                                                                                                                                                                                                                                                                                                                                                                                                                                                                                                                                                                                                                                                                                                                                                                                                                                                                                                                                                                                                                                                                                               |              |             |              |              |              |             |              |                                                                                                                                                                                                                                                                                                                                                                                                                                                                                                                                                                                                                                                                                                                                                                                                                                                                                                                                                                                                                                                                                                                                                                                                                           |   |             |              |              |   |             |              |              |   |              |              |              |   |             |              |              |   |             |              |              |   |              |              |              |   |             |              |             |   |              |              |              |   |              |              |             |   |              |              |              |   |             |             |             |   |             |             |              |   |              |              |              |
| 8                                                                                                                                                                                                                                                                                                                                                                                                                                                                                                                                                                                                                                                                                                                                                                                                                                                                                                                                                                                                                                                                                                                                                                                                                                                                                                               | 0.763159000  | 1.482580000  | 1.884732000  |              |   |              |              |              |   |              |              |              |   |              |              |              |   |             |              |              |   |              |              |              |   |              |              |              |   |              |              |             |   |              |              |              |   |              |             |             |   |              |             |             |   |              |              |              |                                                                                                                                                                                                                                                                                                                                                                                                                                                                                                                                                                                                                                                                                                                                                                                                                                                                                                                                                                                                                                                                                                                                                                                                                                                                                                                                                                                               |              |             |              |              |              |             |              |                                                                                                                                                                                                                                                                                                                                                                                                                                                                                                                                                                                                                                                                                                                                                                                                                                                                                                                                                                                                                                                                                                                                                                                                                           |   |             |              |              |   |             |              |              |   |              |              |              |   |             |              |              |   |             |              |              |   |              |              |              |   |             |              |             |   |              |              |              |   |              |              |             |   |              |              |              |   |             |             |             |   |             |             |              |   |              |              |              |
| 8                                                                                                                                                                                                                                                                                                                                                                                                                                                                                                                                                                                                                                                                                                                                                                                                                                                                                                                                                                                                                                                                                                                                                                                                                                                                                                               | 0.634169000  | 2.742251000  | -0.047799000 |              |   |              |              |              |   |              |              |              |   |              |              |              |   |             |              |              |   |              |              |              |   |              |              |              |   |              |              |             |   |              |              |              |   |              |             |             |   |              |             |             |   |              |              |              |                                                                                                                                                                                                                                                                                                                                                                                                                                                                                                                                                                                                                                                                                                                                                                                                                                                                                                                                                                                                                                                                                                                                                                                                                                                                                                                                                                                               |              |             |              |              |              |             |              |                                                                                                                                                                                                                                                                                                                                                                                                                                                                                                                                                                                                                                                                                                                                                                                                                                                                                                                                                                                                                                                                                                                                                                                                                           |   |             |              |              |   |             |              |              |   |              |              |              |   |             |              |              |   |             |              |              |   |              |              |              |   |             |              |             |   |              |              |              |   |              |              |             |   |              |              |              |   |             |             |             |   |             |             |              |   |              |              |              |
| 6                                                                                                                                                                                                                                                                                                                                                                                                                                                                                                                                                                                                                                                                                                                                                                                                                                                                                                                                                                                                                                                                                                                                                                                                                                                                                                               | 3.148935000  | -0.201879000 | -0.537550000 |              |   |              |              |              |   |              |              |              |   |              |              |              |   |             |              |              |   |              |              |              |   |              |              |              |   |              |              |             |   |              |              |              |   |              |             |             |   |              |             |             |   |              |              |              |                                                                                                                                                                                                                                                                                                                                                                                                                                                                                                                                                                                                                                                                                                                                                                                                                                                                                                                                                                                                                                                                                                                                                                                                                                                                                                                                                                                               |              |             |              |              |              |             |              |                                                                                                                                                                                                                                                                                                                                                                                                                                                                                                                                                                                                                                                                                                                                                                                                                                                                                                                                                                                                                                                                                                                                                                                                                           |   |             |              |              |   |             |              |              |   |              |              |              |   |             |              |              |   |             |              |              |   |              |              |              |   |             |              |             |   |              |              |              |   |              |              |             |   |              |              |              |   |             |             |             |   |             |             |              |   |              |              |              |

|                                                                            |              |              |              |                                                                            |              |              |              |
|----------------------------------------------------------------------------|--------------|--------------|--------------|----------------------------------------------------------------------------|--------------|--------------|--------------|
| 8                                                                          | -2.081241000 | 1.506026000  | 0.144835000  | 8                                                                          | 3.190761000  | -1.097355000 | -1.266880000 |
| 6                                                                          | 2.778739000  | -0.650840000 | -0.579690000 | 8                                                                          | 3.141022000  | 0.695053000  | 0.190328000  |
| 8                                                                          | 2.609871000  | -1.129521000 | -1.617035000 | 6                                                                          | -2.510806000 | -1.318525000 | 0.463099000  |
| 8                                                                          | 3.004678000  | -0.166540000 | 0.445648000  | 8                                                                          | -2.867169000 | -1.136034000 | -0.622394000 |
|                                                                            |              |              |              | 8                                                                          | -2.171386000 | -1.513032000 | 1.548612000  |
|                                                                            |              |              |              | 6                                                                          | -1.941491000 | 1.623460000  | -0.828805000 |
|                                                                            |              |              |              | 8                                                                          | -2.161065000 | 1.650997000  | 0.307346000  |
|                                                                            |              |              |              | 8                                                                          | -1.751864000 | 1.607710000  | -1.966495000 |
| <b>G(CO<sub>2</sub>)<sub>5</sub></b><br><b>SCF E = -1148.27053303 a.u.</b> |              |              |              | <b>G(CO<sub>2</sub>)<sub>6</sub></b><br><b>SCF E = -1336.85622939 a.u.</b> |              |              |              |
| 7                                                                          | -0.505846000 | -2.188229000 | -0.138576000 | 7                                                                          | 0.152957000  | -1.789420000 | 0.213915000  |
| 1                                                                          | -0.027863000 | -2.775495000 | 0.532888000  | 1                                                                          | -0.493238000 | -2.553929000 | 0.060388000  |
| 1                                                                          | -0.165499000 | -2.334612000 | -1.078582000 | 1                                                                          | 0.623799000  | -1.834843000 | 1.107405000  |
| 6                                                                          | -0.610321000 | -0.853984000 | 0.225744000  | 6                                                                          | -0.344255000 | -0.538724000 | -0.112110000 |
| 7                                                                          | -0.655857000 | 0.148445000  | -0.570529000 | 7                                                                          | -0.086827000 | 0.566072000  | 0.486169000  |
| 1                                                                          | -0.485034000 | -0.130160000 | -1.533408000 | 1                                                                          | 0.464651000  | 0.405312000  | 1.325647000  |
| 7                                                                          | -0.685466000 | -0.658278000 | 1.595276000  | 7                                                                          | -1.194572000 | -0.554626000 | -1.206379000 |
| 1                                                                          | -1.211323000 | -1.368862000 | 2.087742000  | 1                                                                          | -0.900525000 | -1.179112000 | -1.946704000 |
| 1                                                                          | -0.998924000 | 0.277909000  | 1.824284000  | 1                                                                          | -1.407476000 | 0.379150000  | -1.539093000 |
| 6                                                                          | -2.143245000 | 2.390112000  | 0.096690000  | 6                                                                          | -1.193067000 | 3.011726000  | -0.290828000 |
| 8                                                                          | -2.540168000 | 1.851479000  | 1.041128000  | 8                                                                          | -1.762648000 | 2.498299000  | -1.159199000 |
| 8                                                                          | -1.787342000 | 2.975842000  | -0.831868000 | 8                                                                          | -0.648208000 | 3.578739000  | 0.552189000  |
| 6                                                                          | 2.153269000  | -1.118415000 | 1.771477000  | 6                                                                          | -3.464157000 | -2.187430000 | -0.466070000 |
| 8                                                                          | 1.936177000  | -2.251286000 | 1.854741000  | 8                                                                          | -4.251813000 | -1.357910000 | -0.609622000 |
| 8                                                                          | 2.411073000  | 0.003985000  | 1.692010000  | 8                                                                          | -2.702781000 | -3.048922000 | -0.327016000 |
| 6                                                                          | 1.143047000  | 2.094135000  | 0.236130000  | 6                                                                          | -2.797626000 | 0.422648000  | 1.620103000  |
| 8                                                                          | 1.828062000  | 1.868589000  | -0.666888000 | 8                                                                          | -2.630910000 | -0.707460000 | 1.812786000  |
| 8                                                                          | 0.494987000  | 2.364506000  | 1.154292000  | 8                                                                          | -2.992041000 | 1.545795000  | 1.448404000  |
| 6                                                                          | -3.289184000 | -1.580918000 | -0.858058000 | 6                                                                          | 2.475734000  | -1.535424000 | -1.422300000 |
| 8                                                                          | -3.596146000 | -1.511742000 | 0.253163000  | 8                                                                          | 1.815627000  | -1.100360000 | -2.266731000 |
| 8                                                                          | -3.002546000 | -1.654671000 | -1.975227000 | 8                                                                          | 3.162301000  | -1.968822000 | -0.601588000 |
| 6                                                                          | 3.012782000  | -0.422023000 | -1.680289000 | 6                                                                          | 3.546778000  | -0.519777000 | 1.812064000  |
| 8                                                                          | 3.789347000  | 0.223598000  | -2.232329000 | 8                                                                          | 4.652942000  | -0.311784000 | 1.573696000  |
| 8                                                                          | 2.244147000  | -1.099774000 | -1.137306000 | 8                                                                          | 2.437883000  | -0.730418000 | 2.078113000  |
|                                                                            |              |              |              | 6                                                                          | 1.965369000  | 1.728396000  | -1.003243000 |
|                                                                            |              |              |              | 8                                                                          | 2.725817000  | 1.101461000  | -0.392742000 |
|                                                                            |              |              |              | 8                                                                          | 1.253734000  | 2.368975000  | -1.644449000 |
| <b>G(CO<sub>2</sub>)<sub>7</sub></b><br><b>SCF E = -1525.44219885 a.u.</b> |              |              |              | <b>G(CO<sub>2</sub>)<sub>8</sub></b><br><b>SCF E = -1714.02532964 a.u.</b> |              |              |              |
| 7                                                                          | -1.259570000 | 1.479062000  | -1.069859000 | 7                                                                          | -0.903868000 | -2.059340000 | -0.658058000 |
| 1                                                                          | -2.254633000 | 1.652146000  | -1.141489000 | 1                                                                          | -1.800362000 | -2.528170000 | -0.688827000 |
| 1                                                                          | -0.765874000 | 1.534208000  | -1.949699000 | 1                                                                          | -0.282326000 | -2.442852000 | 0.042614000  |
| 6                                                                          | -0.901958000 | 0.417640000  | -0.260878000 | 6                                                                          | -0.962970000 | -0.680909000 | -0.676274000 |
| 7                                                                          | 0.091340000  | -0.378155000 | -0.425789000 | 7                                                                          | -0.089077000 | 0.119264000  | -0.180271000 |
| 1                                                                          | 0.536190000  | -0.255308000 | -1.331531000 | 1                                                                          | 0.636921000  | -0.405083000 | 0.302419000  |
| 7                                                                          | -1.743997000 | 0.248521000  | 0.828541000  | 7                                                                          | -2.095128000 | -0.172039000 | -1.300301000 |
| 1                                                                          | -2.046520000 | 1.115932000  | 1.256357000  | 1                                                                          | -2.366824000 | -0.694211000 | -2.124800000 |

|                                      |              |              |              |                                       |              |              |              |
|--------------------------------------|--------------|--------------|--------------|---------------------------------------|--------------|--------------|--------------|
| 1                                    | -1.363545000 | -0.405980000 | 1.503182000  | 1                                     | -1.991826000 | 0.815362000  | -1.509296000 |
| 6                                    | 0.713170000  | -2.512006000 | 1.175738000  | 6                                     | -0.294660000 | 2.867123000  | -0.068471000 |
| 8                                    | 0.144725000  | -2.035319000 | 2.066193000  | 8                                     | -0.891846000 | 2.885643000  | -1.060263000 |
| 8                                    | 1.302686000  | -3.029523000 | 0.330750000  | 8                                     | 0.305566000  | 2.912187000  | 0.915803000  |
| 6                                    | -4.477075000 | -0.101495000 | -0.130617000 | 6                                     | -4.565732000 | -1.331813000 | -0.232249000 |
| 8                                    | -4.339855000 | 0.921317000  | -0.655146000 | 8                                     | -4.066957000 | -2.349007000 | -0.471881000 |
| 8                                    | -4.645852000 | -1.116099000 | 0.390707000  | 8                                     | -5.091409000 | -0.332098000 | -0.001962000 |
| 6                                    | -2.188623000 | -2.268752000 | -0.887847000 | 6                                     | -2.642688000 | 0.636696000  | 1.491807000  |
| 8                                    | -2.589714000 | -1.585637000 | -1.731970000 | 8                                     | -2.712698000 | -0.477624000 | 1.795301000  |
| 8                                    | -1.807862000 | -2.966192000 | -0.051938000 | 8                                     | -2.594852000 | 1.749686000  | 1.190611000  |
| 6                                    | 2.296671000  | 1.860327000  | -1.350246000 | 6                                     | 1.883388000  | -2.041085000 | -1.855400000 |
| 8                                    | 3.007218000  | 1.880916000  | -0.441483000 | 8                                     | 1.672076000  | -1.304011000 | -2.717281000 |
| 8                                    | 1.592728000  | 1.842429000  | -2.268013000 | 8                                     | 2.102508000  | -2.792801000 | -1.004234000 |
| 6                                    | -0.254868000 | 3.487876000  | 0.731801000  | 6                                     | 3.192919000  | 1.006174000  | -0.002637000 |
| 8                                    | -1.176721000 | 3.322027000  | 1.409384000  | 8                                     | 2.981713000  | -0.122894000 | -0.171286000 |
| 8                                    | 0.668602000  | 3.684821000  | 0.067305000  | 8                                     | 3.429797000  | 2.117536000  | 0.172228000  |
| 6                                    | 3.522092000  | -1.618389000 | -0.906181000 | 6                                     | 0.780634000  | 1.330998000  | -2.751441000 |
| 8                                    | 2.861339000  | -0.916289000 | -1.549254000 | 8                                     | -0.157725000 | 0.961332000  | -3.312831000 |
| 8                                    | 4.203443000  | -2.313683000 | -0.291265000 | 8                                     | 1.730322000  | 1.727465000  | -2.223683000 |
| 6                                    | 1.822059000  | 0.442138000  | 1.709229000  | 6                                     | 0.690451000  | 0.855972000  | 2.704243000  |
| 8                                    | 1.073152000  | 1.285246000  | 1.964662000  | 8                                     | -0.397243000 | 0.950958000  | 3.074932000  |
| 8                                    | 2.592506000  | -0.390392000 | 1.490935000  | 8                                     | 1.790321000  | 0.740172000  | 2.363864000  |
|                                      |              |              |              | 6                                     | 2.465493000  | -2.230249000 | 1.759736000  |
|                                      |              |              |              | 8                                     | 1.312039000  | -2.108404000 | 1.716300000  |
|                                      |              |              |              | 8                                     | 3.605877000  | -2.362853000 | 1.825934000  |
| <b>G(CO<sub>2</sub>)<sub>9</sub></b> |              |              |              | <b>G(CO<sub>2</sub>)<sub>10</sub></b> |              |              |              |
| <b>SCF E = -1902.60866667 a.u.</b>   |              |              |              | <b>SCF E = -2091.19468783 a.u.</b>    |              |              |              |
| 7                                    | 0.927049000  | 1.531542000  | 0.926435000  | 7                                     | -0.478944000 | 1.576769000  | -1.100177000 |
| 1                                    | 1.894742000  | 1.825425000  | 0.972592000  | 1                                     | -1.307899000 | 1.994127000  | -1.510574000 |
| 1                                    | 0.461229000  | 1.393700000  | 1.811762000  | 1                                     | 0.065602000  | 1.073721000  | -1.790672000 |
| 6                                    | 0.593578000  | 0.656061000  | -0.088549000 | 6                                     | -0.742215000 | 0.845679000  | 0.046658000  |
| 7                                    | -0.291746000 | -0.273747000 | -0.039521000 | 7                                     | -0.171464000 | -0.252130000 | 0.398224000  |
| 1                                    | -0.661240000 | -0.385785000 | 0.903181000  | 1                                     | 0.455184000  | -0.582370000 | -0.332233000 |
| 7                                    | 1.325458000  | 0.868475000  | -1.248460000 | 7                                     | -1.710861000 | 1.415375000  | 0.855186000  |
| 1                                    | 1.485062000  | 1.848799000  | -1.450194000 | 1                                     | -1.704175000 | 2.428846000  | 0.845757000  |
| 1                                    | 0.927784000  | 0.380510000  | -2.043384000 | 1                                     | -1.693443000 | 1.042058000  | 1.797665000  |
| 6                                    | -0.911467000 | -1.794128000 | -2.294420000 | 6                                     | -0.149566000 | -1.101400000 | 3.046307000  |
| 8                                    | -0.629299000 | -0.904038000 | -2.981280000 | 8                                     | -0.524374000 | -0.062770000 | 3.398416000  |
| 8                                    | -1.209461000 | -2.707104000 | -1.657502000 | 8                                     | 0.236746000  | -2.147313000 | 2.753654000  |
| 6                                    | 4.215317000  | 0.899540000  | -0.713594000 | 6                                     | -4.215104000 | 1.524700000  | -0.559814000 |
| 8                                    | 3.946404000  | 1.590624000  | 0.175264000  | 8                                     | -3.608853000 | 1.939676000  | -1.453695000 |
| 8                                    | 4.507701000  | 0.227296000  | -1.603606000 | 8                                     | -4.848095000 | 1.130542000  | 0.320704000  |
| 6                                    | 2.367102000  | -1.796215000 | -0.807031000 | 6                                     | -3.001308000 | -1.268406000 | 0.825116000  |
| 8                                    | 2.856361000  | -1.478911000 | 0.193573000  | 8                                     | -3.184457000 | -1.249271000 | -0.317251000 |
| 8                                    | 1.901170000  | -2.109671000 | -1.813777000 | 8                                     | -2.843863000 | -1.281361000 | 1.967894000  |
| 6                                    | -2.519863000 | 1.948378000  | 1.592544000  | 6                                     | 3.118649000  | 1.672703000  | -0.897260000 |
| 8                                    | -3.314923000 | 2.218758000  | 0.801834000  | 8                                     | 3.569158000  | 1.952104000  | 0.127898000  |
| 8                                    | -1.724238000 | 1.683993000  | 2.389915000  | 8                                     | 2.676708000  | 1.388054000  | -1.927093000 |
| 6                                    | 2.099519000  | -0.782896000 | 2.731636000  | 6                                     | -1.666898000 | -1.529766000 | -2.570087000 |
| 8                                    | 3.110944000  | -0.244997000 | 2.863932000  | 8                                     | -1.943067000 | -0.453754000 | -2.885114000 |



|   |              |              |              |   |              |              |              |
|---|--------------|--------------|--------------|---|--------------|--------------|--------------|
| 8 | 1.072084000  | -1.304850000 | 2.623623000  | 8 | -1.387298000 | -2.611452000 | -2.274361000 |
| 6 | -3.538280000 | -1.494777000 | 0.571564000  | 6 | 3.035103000  | -1.660756000 | 0.785414000  |
| 8 | -3.149003000 | -0.666217000 | 1.281762000  | 8 | 2.854609000  | -0.946679000 | -0.112502000 |
| 8 | -3.947556000 | -2.318063000 | -0.121532000 | 8 | 3.237280000  | -2.370974000 | 1.665928000  |
| 6 | -2.273442000 | 1.117572000  | -1.661260000 | 6 | 1.665295000  | 1.377483000  | 2.162269000  |
| 8 | -1.545881000 | 2.013479000  | -1.739877000 | 8 | 1.085313000  | 2.332232000  | 1.866035000  |
| 8 | -3.022016000 | 0.240334000  | -1.604353000 | 8 | 2.258320000  | 0.436781000  | 2.475856000  |
| 6 | -0.117716000 | 3.991203000  | -0.227656000 | 6 | 0.490277000  | 4.135392000  | -0.224059000 |
| 8 | 0.742719000  | 3.959186000  | -0.999917000 | 8 | -0.558936000 | 4.311082000  | 0.230490000  |
| 8 | -0.975384000 | 4.055729000  | 0.541689000  | 8 | 1.541373000  | 4.001568000  | -0.680901000 |
| 6 | -0.286439000 | -3.193938000 | 0.942932000  | 6 | -0.218540000 | -3.243829000 | 0.200540000  |
| 8 | 0.742215000  | -3.506086000 | 0.519847000  | 8 | -1.286773000 | -3.446105000 | 0.584175000  |
| 8 | -1.312180000 | -2.905877000 | 1.387889000  | 8 | 0.854639000  | -3.065741000 | -0.195678000 |
|   |              |              |              | 6 | 2.087121000  | -1.294710000 | -2.780497000 |
|   |              |              |              | 8 | 1.014332000  | -0.908366000 | -2.567267000 |
|   |              |              |              | 8 | 3.144330000  | -1.683128000 | -3.013448000 |

## References

1. R. Ditchfield, *Mol. Phys.*, 1974, **27**, 789-807.
2. L. B. Casabianca, *Magn. Reson. Chem*, 2020.
3. Q. Yang, M. Bown, A. Ali, D. Winkler, G. Puxty and M. Attalla, *Energy Procedia*, 2009, **1**, 955-962.
4. J. Seravalli and S. W. Ragsdale, *Biochemistry*, 2008, **47**, 6770-6781.
5. T. M. Abbott, G. W. Buchanan, P. Kruus and K. C. Lee, *Canadian Journal of Chemistry*, 1982, **60**, 1000-1006.
6. C. Perinu, B. Arstad and K.-J. Jens, *Energy Procedia*, 2013, **37**, 7310-7317.
